# Supplementary material for: The circular economy of water across the six continents
Source: Royal Society of Chemistry journal article supplement (doi:10.1039/d3cs00812f), 2024-01-01
Supplement: d3cs00812f1.pdf [file d3cs00812f1.pdf]

Supporting Information

**The circular economy of water across the six continents**

Mohammad Peydayesh<sup>1\*</sup>, and Raffaele Mezzenga<sup>1,2\*</sup>

<sup>1</sup> *ETH Zurich, Department of Health Sciences and Technology, 8092 Zurich, Switzerland*

<sup>2</sup> *ETH Zurich, Department of Materials, 8093 Zurich, Switzerland*

E-mails: [mohammad.peydayesh@hest.ethz.ch](mailto:mohammad.peydayesh@hest.ethz.ch)

[raffaele.mezzenga@hest.ethz.ch](mailto:raffaele.mezzenga@hest.ethz.ch)

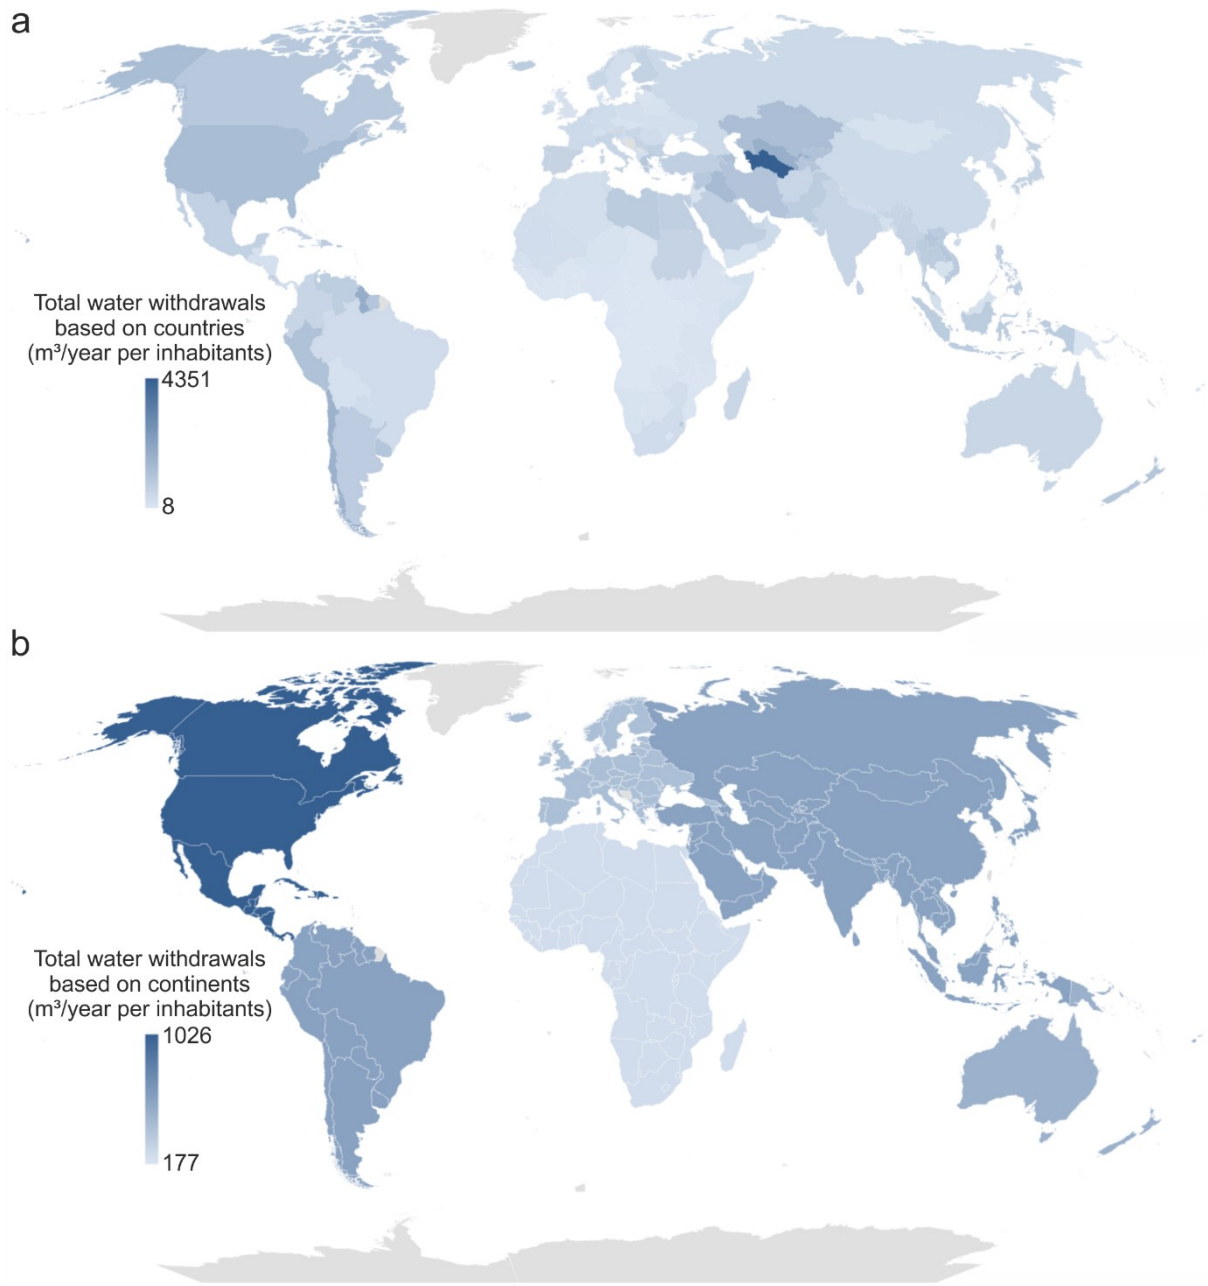

**Figure S1.** The worldwide water consumption, **a**, for each country and **b**, averaged by continent<sup>1</sup>.

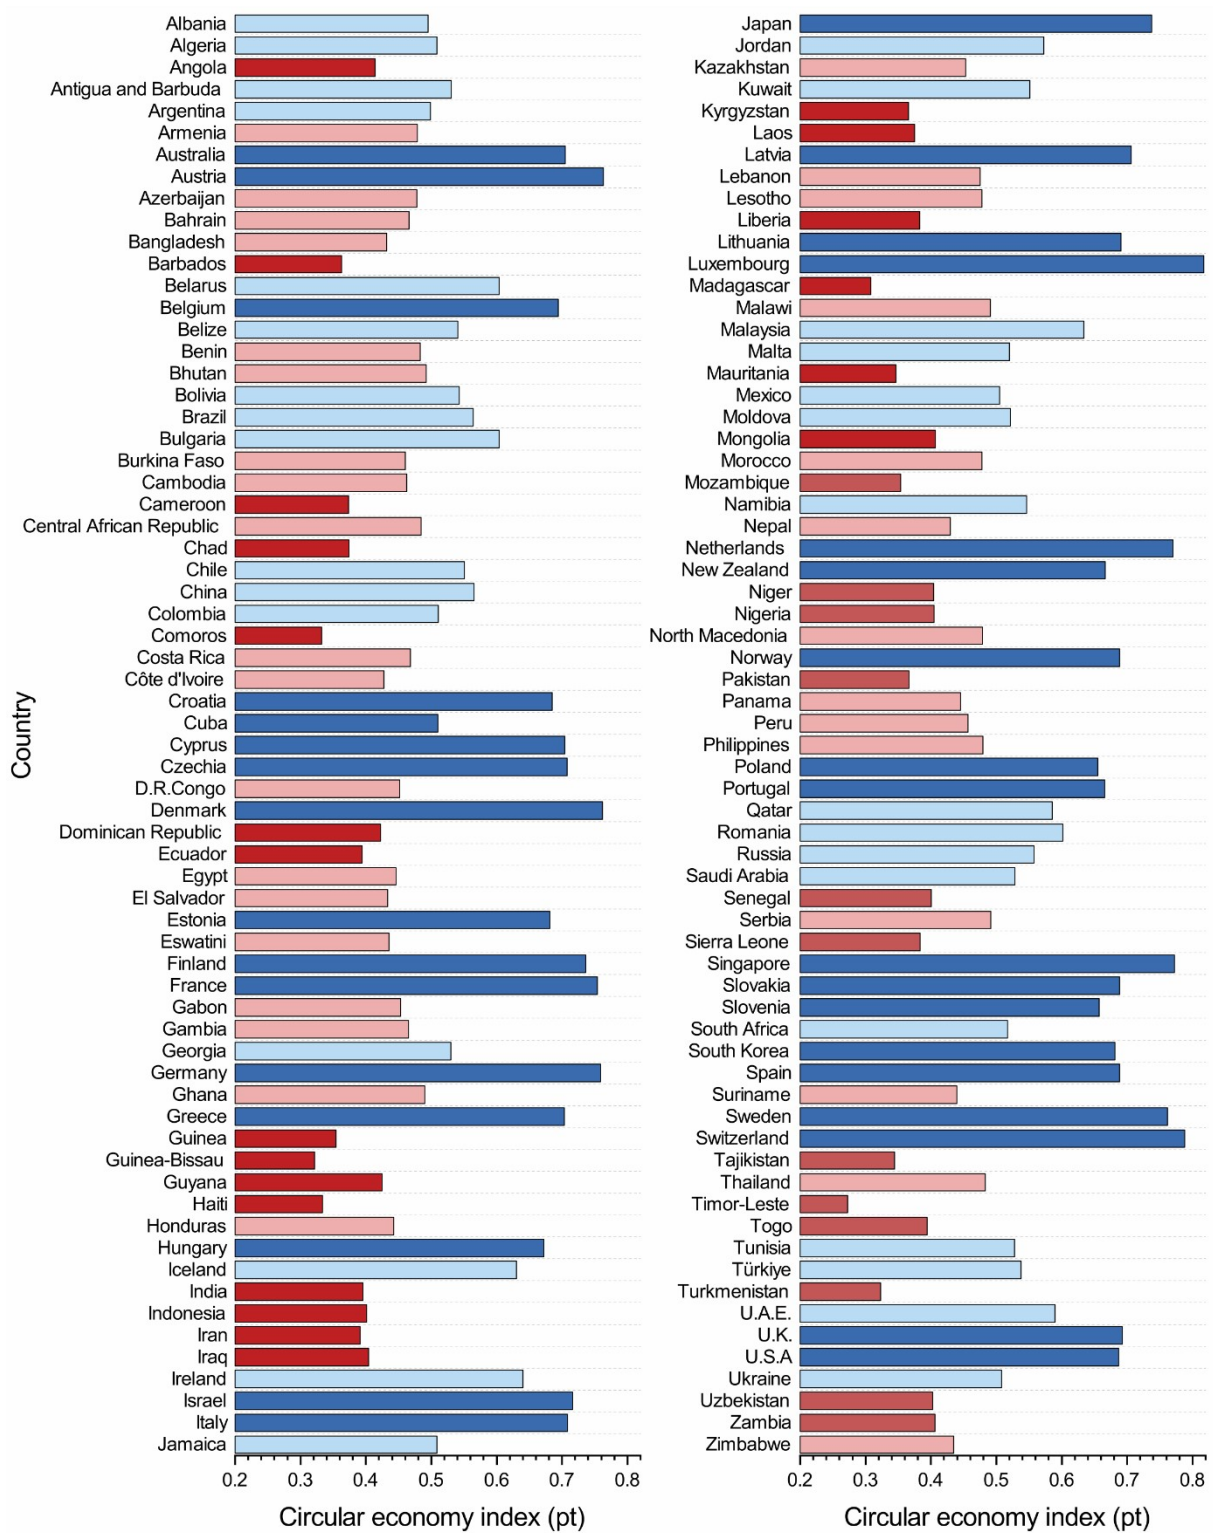

Figure S2. WCEI for 132 studied countries in alphabetical order.

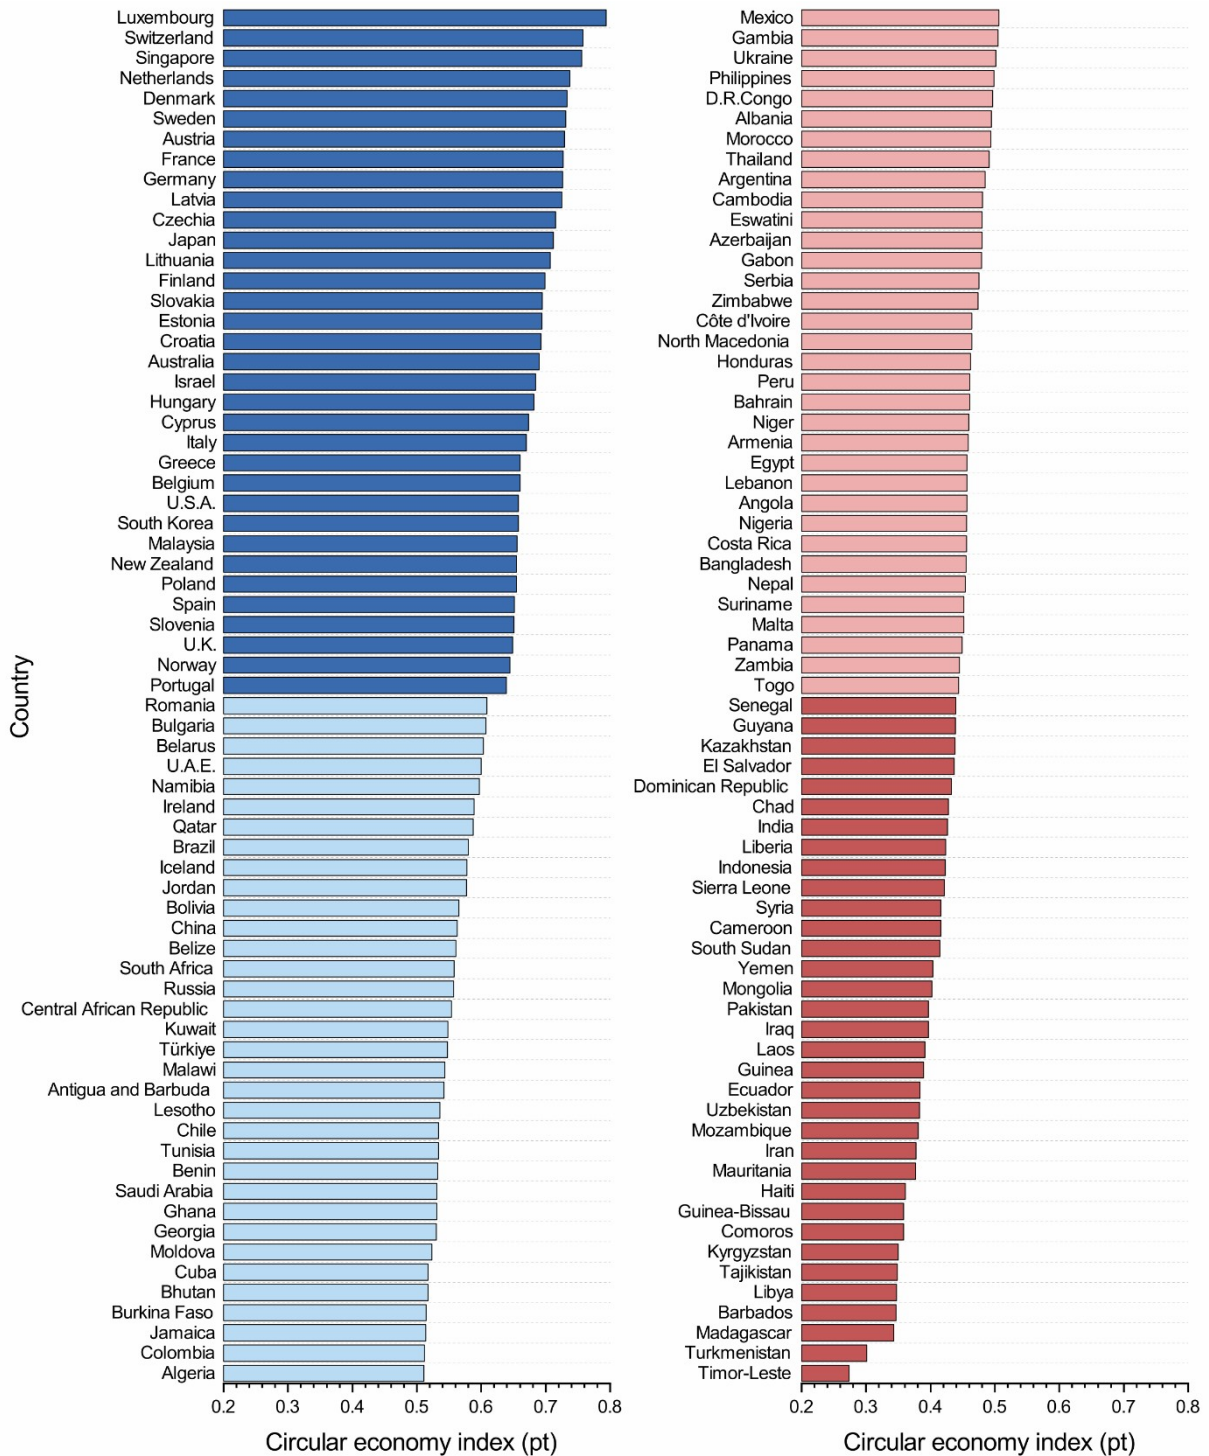

**Figure S3.** WCEI ranking for 136 studied countries divided into 4 categories. The analysis is performed with 7 indicators, including water use efficiency, water stress, total population with access to safe drinking water, proportion of safely treated domestic wastewater flows, degree of integrated water resources management implementation, proportion of hydrological basins showing high surface water extent changes and tap water price per GDP per capita.

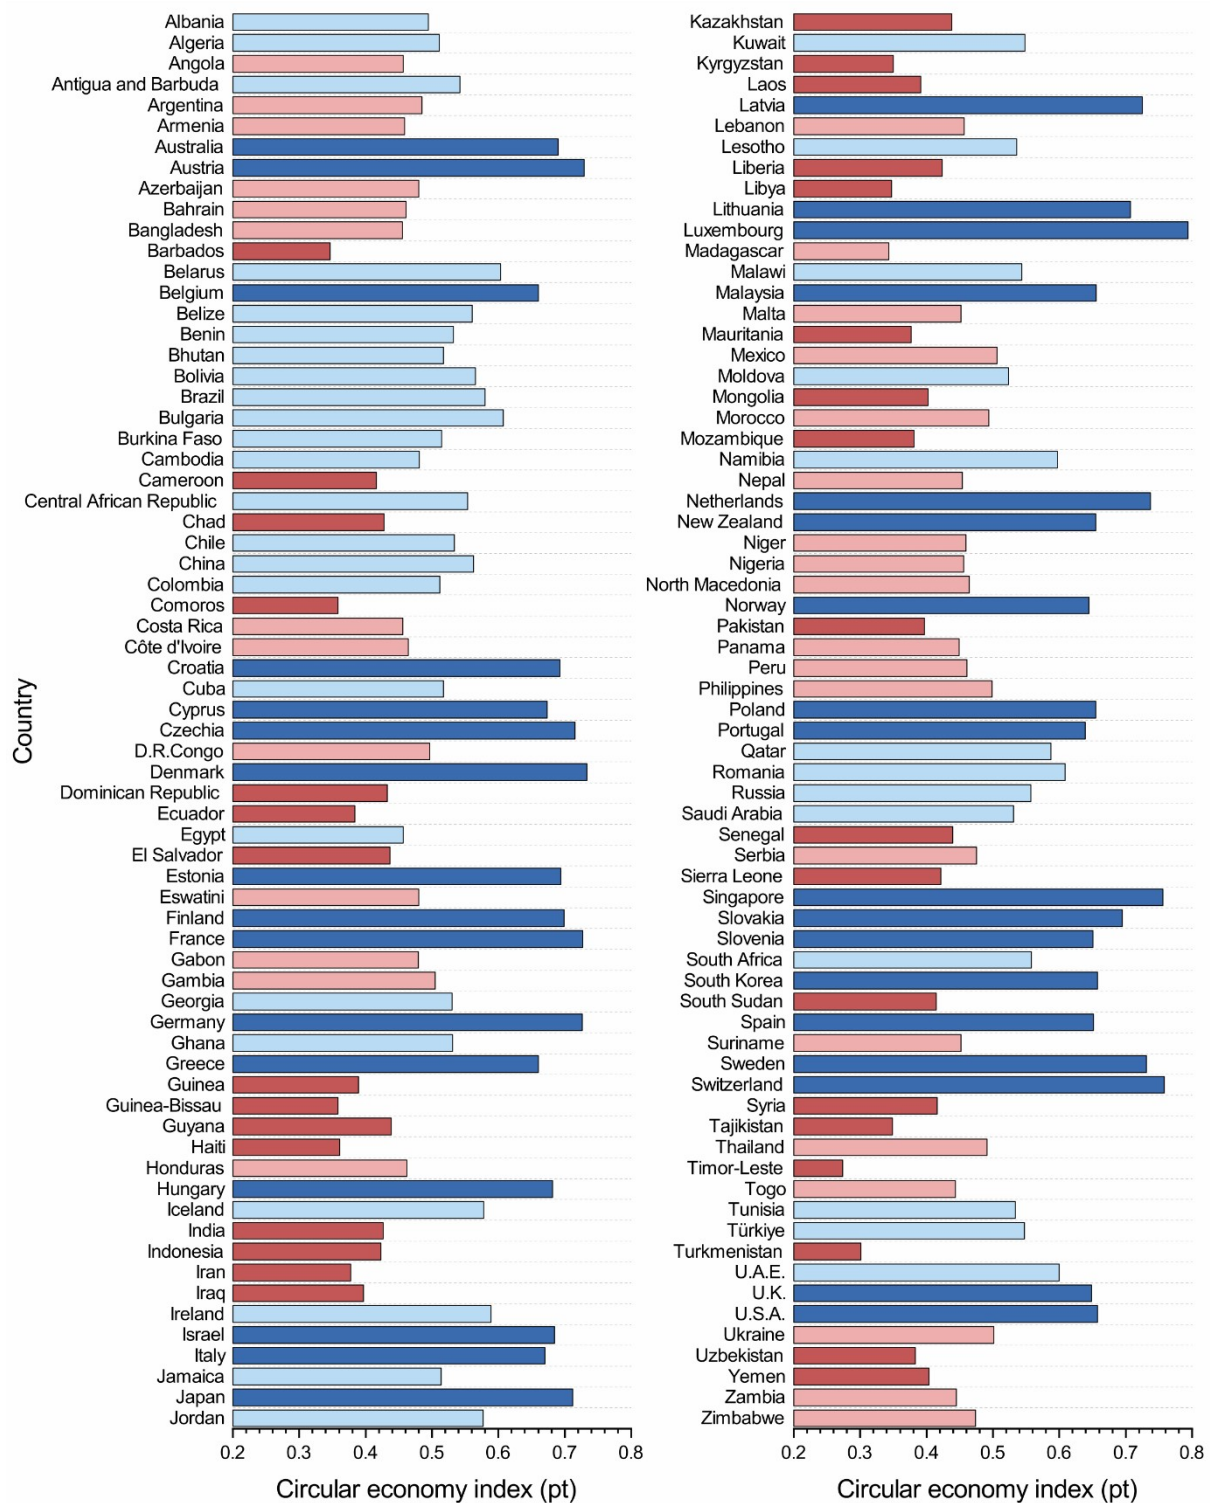

Figure S4. WCEI for 136 studied countries in alphabetical order.

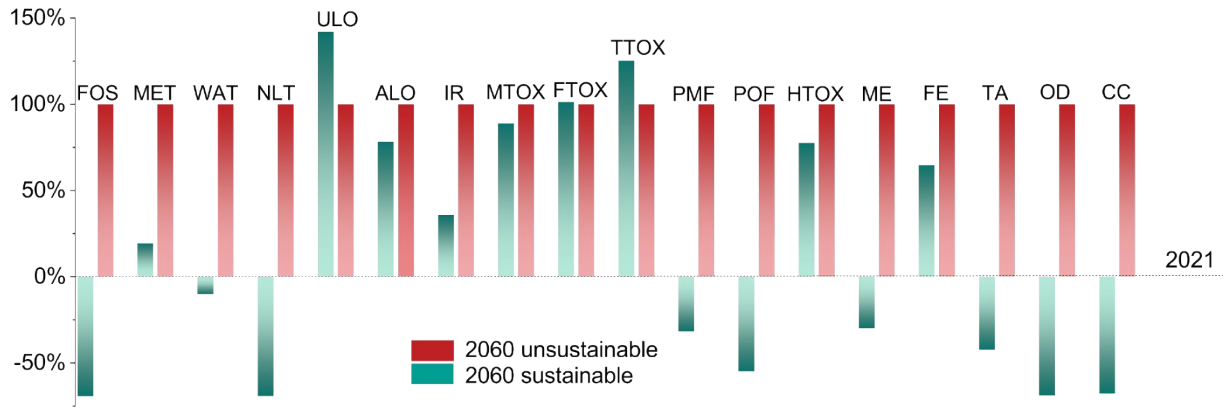

**Figure S5.** Full-spectrum life cycle impacts of water treatment in Singapore based on energy consumption for three cases: 2021, 2060 unsustainable with current energy sources (90% Natural gas and 10 % photovoltaic), 2060 sustainable (50% Natural gas and 50 % photovoltaic).

Table S1. Water stress, population density and GDP of different countries<sup>1</sup>.

| Country                                  | Population density<br>(Inhab./km <sup>2</sup> ) | GDP<br>(\$/Inhab.) | Water Stress<br>(%) |
|------------------------------------------|-------------------------------------------------|--------------------|---------------------|
| <b>Asia</b>                              |                                                 |                    |                     |
| Afghanistan                              | 56.94                                           | 563.98             | 54.76               |
| Armenia                                  | 99.25                                           | 4237.39            | 54.75               |
| Australia                                | 3.22                                            | 58689.49           | 4.66                |
| Azerbaijan                               | 114.89                                          | 4729.90            | 53.73               |
| Bahrain                                  | 2012.11                                         | 24171.33           | 133.71              |
| Bangladesh                               | 1093.56                                         | 1620.67            | 5.72                |
| Bhutan                                   | 19.65                                           | 3253.53            | 1.41                |
| Brunei Darussalam                        | 74.34                                           | 31254.69           | 3.47                |
| Cambodia                                 | 89.76                                           | 1512.51            | 1.04                |
| China                                    | 152.02                                          | 9855.46            | 43.22               |
| Cyprus                                   | 128.57                                          | 28956.96           | 28.29               |
| Democratic People's<br>Republic of Korea | 211.96                                          | 686.21             | 27.74               |
| Equatorial Guinea                        | 46.67                                           | 10141.12           | 0.18                |
| Fiji                                     | 48.36                                           | 6069.46            | 0.30                |
| India                                    | 411.48                                          | 2052.62            | 66.49               |
| Indonesia                                | 139.64                                          | 3906.27            | 29.70               |
| Iran                                     | 46.87                                           | 5768.58            | 81.29               |
| Iraq                                     | 88.34                                           | 5395.86            | 47.14               |
| Israel                                   | 379.77                                          | 43841.83           | 95.94               |
| Japan                                    | 336.60                                          | 39087.24           | 36.46               |
| Jordan                                   | 111.57                                          | 4264.12            | 100.08              |
| Kazakhstan                               | 6.72                                            | 9744.69            | 32.65               |
| Kuwait                                   | 232.17                                          | 33760.74           | 3850.50             |
| Kyrgyzstan                               | 31.53                                           | 1319.57            | 50.04               |
| Lao People's Democratic<br>Republic      | 29.82                                           | 2579.12            | 4.77                |
| Lebanon                                  | 656.40                                          | 9257.30            | 58.79               |
| Luxembourg                               | 233.30                                          | 120137.96          | 4.33                |
| Malaysia                                 | 95.31                                           | 11190.75           | 3.44                |
| Maldives                                 | 1718.99                                         | 11991.75           | 15.67               |
| Mongolia                                 | 2.03                                            | 4167.37            | 3.40                |
| Myanmar                                  | 79.38                                           | 1350.74            | 5.80                |
| Nepal                                    | 190.89                                          | 939.45             | 8.31                |
| New Zealand                              | 17.72                                           | 43776.47           | 8.05                |
| Oman                                     | 15.60                                           | 19070.91           | 116.71              |
| Pakistan                                 | 266.58                                          | 1406.01            | 118.24              |
| Palestine                                | 807.80                                          | 3221.32            | 42.75               |
| Papua New Guinea                         | 18.59                                           | 2741.30            | 0.13                |
| Philippines                              | 355.50                                          | 3106.79            | 28.66               |

|                      |         |          |         |
|----------------------|---------|----------|---------|
| Qatar                | 242.10  | 71010.32 | 431.03  |
| Republic of Korea    | 510.08  | 33626.66 | 85.22   |
| Saudi Arabia         | 15.68   | 23319.89 | 1000.00 |
| Singapore            | 7952.35 | 62348.34 | 81.85   |
| Sri Lanka            | 323.56  | 4245.43  | 90.79   |
| Syrian Arab Republic | 91.51   | 909.42   | 124.36  |
| Tajikistan           | 64.37   | 826.04   | 64.48   |
| Thailand             | 135.31  | 7299.35  | 23.01   |
| Timor-Leste          | 85.27   | 1949.26  | 28.27   |
| Turkey               | 104.85  | 9416.32  | 45.38   |
| Turkmenistan         | 11.99   | 6963.94  | 143.56  |
| United Arab Emirates | 135.26  | 43407.64 | 1667.33 |
| Uzbekistan           | 72.34   | 1560.33  | 168.92  |
| Vietnam              | 288.46  | 2538.07  | 18.13   |
| Yemen                | 53.98   | 922.40   | 169.76  |

### **Africa**

---

|                                  |        |         |        |
|----------------------------------|--------|---------|--------|
| Algeria                          | 17.73  | 4136.29 | 137.92 |
| Angola                           | 24.71  | 3441.27 | 1.87   |
| Benin                            | 100.08 | 906.49  | 0.98   |
| Botswana                         | 3.87   | 7978.14 | 2.02   |
| Burkina Faso                     | 72.03  | 820.17  | 7.82   |
| Burundi                          | 401.56 | 292.89  | 10.19  |
| Cabo Verde                       | 134.93 | 3572.55 | 8.43   |
| Cameroon                         | 53.04  | 1567.95 | 1.56   |
| Central African Republic         | 7.49   | 473.50  | 0.34   |
| Chad                             | 12.05  | 741.70  | 4.29   |
| Comoros                          | 447.24 | 1400.49 | 0.83   |
| Congo                            | 15.33  | 2624.72 | 0.03   |
| Cote d'Ivoire                    | 77.74  | 1727.63 | 5.09   |
| Democratic Republic of the Congo | 35.85  | 561.23  | 0.23   |
| Djibouti                         | 41.33  | 3009.41 | 6.33   |
| Egypt                            | 98.28  | 2513.20 | 141.17 |
| Eritrea                          | 28.36  | 1321.38 | 11.18  |
| Eswatini                         | 65.45  | 3385.57 | 77.56  |
| Ethiopia                         | 96.13  | 746.66  | 32.26  |
| Gabon                            | 7.92   | 8219.38 | 0.50   |
| Gambia                           | 201.78 | 754.62  | 2.21   |
| Ghana                            | 124.79 | 2224.26 | 6.31   |
| Guinea                           | 50.49  | 891.75  | 1.37   |
| Guinea-Bissau                    | 51.88  | 764.90  | 1.50   |
| Kenya                            | 88.55  | 1725.30 | 33.24  |
| Lesotho                          | 69.44  | 1162.72 | 2.57   |
| Liberia                          | 43.27  | 437.12  | 0.26   |
| Libya                            | 3.80   | 5312.47 | 817.14 |
| Madagascar                       | 44.72  | 527.39  | 11.26  |



|                                |        |          |        |
|--------------------------------|--------|----------|--------|
| Malawi                         | 153.13 | 375.49   | 17.50  |
| Mali                           | 15.38  | 898.69   | 8.00   |
| Mauritania                     | 4.27   | 1678.32  | 13.25  |
| Mauritius                      | 621.17 | 11211.98 | 21.48  |
| Morocco                        | 80.68  | 3258.23  | 50.75  |
| Mozambique                     | 36.90  | 482.06   | 1.75   |
| Namibia                        | 2.97   | 5610.40  | 0.86   |
| Niger                          | 17.71  | 574.64   | 7.45   |
| Nigeria                        | 212.04 | 2153.52  | 9.67   |
| Rwanda                         | 467.05 | 760.73   | 6.09   |
| Sao Tome and Principe          | 219.82 | 1968.73  | 1.88   |
| Senegal                        | 80.60  | 1461.17  | 11.81  |
| Sierra Leone                   | 105.81 | 531.28   | 0.50   |
| Somalia                        | 23.54  | 98.44    | 24.53  |
| South Africa                   | 47.41  | 6412.96  | 63.56  |
| South Sudan                    | 17.31  | 635.25   | 4.23   |
| Sudan                          | 22.55  | 1216.88  | 118.66 |
| Togo                           | 138.92 | 646.41   | 3.39   |
| Tunisia                        | 70.69  | 3421.78  | 96.00  |
| Uganda                         | 176.90 | 679.87   | 5.83   |
| United Republic of<br>Tanzania | 59.45  | 994.45   | 12.96  |
| Zambia                         | 23.06  | 1549.35  | 2.84   |
| Zimbabwe                       | 36.95  | 1437.43  | 35.41  |

### **Europe**

---

|                        |        |          |       |
|------------------------|--------|----------|-------|
| Albania                | 103.96 | 5131.91  | 5.76  |
| Austria                | 106.00 | 52047.26 | 9.64  |
| Belarus                | 45.53  | 6312.05  | 4.58  |
| Belgium                | 376.09 | 47225.76 | 49.07 |
| Bosnia and Herzegovina | 64.91  | 5646.25  | 2.66  |
| Bulgaria               | 63.56  | 9407.50  | 40.10 |
| Croatia                | 73.44  | 14644.50 | 1.50  |
| Czechia                | 135.21 | 23079.54 | 24.19 |
| Denmark                | 134.02 | 61809.75 | 29.06 |
| Estonia                | 29.18  | 23528.80 | 17.41 |
| Finland                | 16.32  | 49955.34 | 6.64  |
| France                 | 118.36 | 41168.65 | 23.64 |
| Georgia                | 57.43  | 4504.48  | 4.21  |
| Germany                | 232.68 | 47993.47 | 33.50 |
| Greece                 | 79.74  | 19577.78 | 20.48 |
| Hungary                | 104.35 | 16295.33 | 7.65  |
| Iceland                | 3.27   | 76624.49 | 0.39  |
| Ireland                | 68.56  | 79661.62 | 20.04 |
| Italy                  | 200.71 | 35163.57 | 30.00 |
| Latvia                 | 29.86  | 17837.90 | 1.08  |
| Lithuania              | 42.90  | 18583.57 | 1.83  |

|                     |         |          |       |
|---------------------|---------|----------|-------|
| Malta               | 1372.65 | 33671.59 | 85.15 |
| Netherlands         | 456.26  | 53505.05 | 16.38 |
| North Macedonia     | 81.02   | 6056.86  | 25.27 |
| Norway              | 13.86   | 81101.66 | 2.05  |
| Poland              | 121.28  | 15369.73 | 33.22 |
| Portugal            | 111.21  | 23397.87 | 12.32 |
| Republic of Moldova | 119.70  | 2798.55  | 12.43 |
| Romania             | 81.82   | 12234.10 | 6.01  |
| Russia              | 8.52    | 11534.18 | 4.12  |
| Serbia              | 99.62   | 7215.96  | 6.26  |
| Slovakia            | 111.22  | 19442.19 | 2.39  |
| Slovenia            | 102.50  | 25962.33 | 6.50  |
| Spain               | 92.29   | 30599.42 | 42.56 |
| Sweden              | 22.29   | 55704.97 | 3.43  |
| Switzerland         | 206.48  | 82530.17 | 6.50  |
| Ukraine             | 73.31   | 2972.84  | 13.87 |
| United Kingdom      | 275.61  | 42889.39 | 14.35 |

#### **North America**

---

|                                     |        |          |       |
|-------------------------------------|--------|----------|-------|
| Antigua and Barbuda                 | 218.83 | 15629.05 | 8.46  |
| Barbados                            | 666.61 | 17761.54 | 87.50 |
| Belize                              | 16.68  | 4892.75  | 1.26  |
| Canada                              | 3.75   | 46343.37 | 3.67  |
| Costa Rica                          | 97.84  | 12138.82 | 5.21  |
| Cuba                                | 103.19 | 8705.92  | 23.94 |
| Dominica                            | 95.50  | 7413.64  | 10.00 |
| Dominican Republic                  | 218.35 | 7470.24  | 39.55 |
| El Salvador                         | 305.17 | 4064.06  | 13.21 |
| Grenade                             | 327.81 | 10787.40 | 7.05  |
| Guatemala                           | 158.40 | 4549.68  | 5.74  |
| Haiti                               | 400.84 | 835.72   | 13.38 |
| Honduras                            | 85.23  | 2545.34  | 4.62  |
| Jamaica                             | 267.05 | 5421.06  | 12.47 |
| Mexico                              | 64.24  | 9356.15  | 44.46 |
| Nicaragua                           | 49.59  | 2087.25  | 2.69  |
| Panama                              | 55.45  | 15628.41 | 0.90  |
| Puerto Rico                         | 342.68 | 27638.89 | 19.54 |
| Saint Kitts and Nevis               | 201.70 | 18098.88 | 50.83 |
| Saint Lucia                         | 293.37 | 10696.72 | 14.30 |
| Saint Vincent and the<br>Grenadines | 282.59 | 282.59   | 7.90  |
| Suriname                            | 3.52   | 6084.95  | 3.95  |
| United States of America            | 33.27  | 62981.39 | 28.16 |

#### **South America**

---

|                         |       |          |       |
|-------------------------|-------|----------|-------|
| Argentina               | 15.95 | 11601.89 | 10.46 |
| Bolivia (Plurinational) | 10.33 | 3592.08  | 1.18  |

|                     |        |          |       |
|---------------------|--------|----------|-------|
| State of)           |        |          |       |
| Brazil              | 24.60  | 8861.53  | 1.42  |
| Chile               | 24.77  | 16388.84 | 21.62 |
| Colombia            | 43.50  | 6676.03  | 4.19  |
| Ecuador             | 66.64  | 6428.00  | 6.78  |
| Guyana              | 3.62   | 4880.59  | 3.30  |
| Paraguay            | 17.10  | 5844.28  | 1.84  |
| Peru                | 24.89  | 6827.19  | 6.54  |
| Trinidad and Tobago | 270.92 | 17345.56 | 20.33 |
| Uruguay             | 19.57  | 17177.14 | 9.79  |
| Venezuela           | 31.67  | 6433.93  | 7.54  |

---

Table S2. WCEI for 132 studied countries in alphabetical order (8 indicators).

| Country        | Parameters                                                                               | Unit                                            | Value        | Points       | Ref |
|----------------|------------------------------------------------------------------------------------------|-------------------------------------------------|--------------|--------------|-----|
| <b>Albania</b> | Water use efficiency (SDG 6.4.1.)                                                        | USD/m <sup>3</sup>                              | 12.0974<br>5 | 0.38062      | 1   |
|                | Water stress (SDG 6.4.2.)                                                                | %                                               | 4.72355<br>8 | 0.68828<br>5 | 1   |
|                | Total population with access to safe drinking water (SDG 6.1.1.)                         | %                                               | 95.1         | 0.90392<br>2 | 1   |
|                | Drinking water quality (SDG 6.1.1.)                                                      | %                                               | 50.3         | 0.503        | 2   |
|                | Proportion of safely treated domestic wastewater flows (SDG 6.3.1.)                      | %                                               | 13.3542<br>2 | 0.12855<br>7 | 3   |
|                | Degree of integrated water resources management implementation (SDG 6.5.1.)              | %                                               | 47           | 0.38372<br>1 | 3   |
|                | Proportion of hydrological basins showing high surface water extent changes (SDG 6.6.1.) | %                                               | 11           | 0.89         | 3   |
|                | Tap water price per GDP per capita                                                       | USD/10 <sup>3</sup> m <sup>3</sup> /(USD/inhab) | 0.12353      | 0.08454<br>7 | 4   |
|                | Final point                                                                              | -                                               | -            | 0.49533<br>1 |     |
| <b>Algeria</b> | Water use efficiency (SDG 6.4.1.)                                                        | USD/m <sup>3</sup>                              | 13.8130<br>3 | 0.39852      | 1   |
|                | Water stress (SDG 6.4.2.)                                                                | %                                               | 137.920<br>4 | 0.34184<br>1 | 1   |
|                | Total population with access to safe drinking water (SDG 6.1.1.)                         | %                                               | 83.6         | 0.67843<br>1 | 1   |
|                | Drinking water quality (SDG 6.1.1.)                                                      | %                                               | 49.1         | 0.491        | 2   |
|                | Proportion of safely treated domestic wastewater flows (SDG 6.3.1.)                      | %                                               | 76.1669<br>9 | 0.76029<br>9 | 3   |
|                | Degree of integrated water resources management implementation (SDG 6.5.1.)              | %                                               | 54           | 0.46511<br>6 | 3   |
|                | Proportion of hydrological basins showing high surface water extent changes (SDG 6.6.1.) | %                                               | 11           | 0.89         | 3   |
|                | Tap water price per GDP per capita                                                       | USD/10 <sup>3</sup> m <sup>3</sup> /(USD/inhab) | 0.05938<br>3 | 0.04064<br>3 | 5   |
|                | Final point                                                                              | -                                               | -            | 0.50823<br>1 |     |
| <b>Angola</b>  | Water use efficiency (SDG 6.4.1.)                                                        | USD/m <sup>3</sup>                              | 129          | 0.70009<br>2 | 1   |
|                | Water stress (SDG 6.4.2.)                                                                | %                                               | 1.87188<br>3 | 0.78332<br>4 | 1   |
|                | Total population with access to safe drinking water (SDG 6.1.1.)                         | %                                               | 49           | 0            | 1   |
|                | Drinking water quality (SDG 6.1.1.)                                                      | %                                               | 12           | 0.12         | 2   |
|                | Proportion of safely treated domestic wastewater flows (SDG 6.3.1.)                      | %                                               | 29.2         | 0.28792<br>6 | 6   |
|                | Degree of integrated water resources management implementation (SDG 6.5.1.)              | %                                               | 61           | 0.54651<br>2 | 3   |
|                | Proportion of hydrological basins showing high surface water extent changes (SDG 6.6.1.) | %                                               | 43           | 0.57         | 3   |

|                            |                                                                                          |                                                 |          |          |    |
|----------------------------|------------------------------------------------------------------------------------------|-------------------------------------------------|----------|----------|----|
|                            | Tap water price per GDP per capita                                                       | USD/10 <sup>3</sup> m <sup>3</sup> /(USD/inhab) | 0.448366 | 0.306873 | 7  |
|                            | Final point                                                                              | -                                               | -        | 0.414341 |    |
| <b>Antigua and Barbuda</b> | Water use efficiency (SDG 6.4.1.)                                                        | USD/m <sup>3</sup>                              | 98.08363 | 0.663109 | 1  |
|                            | Water stress (SDG 6.4.2.)                                                                | %                                               | 8.461538 | 0.628427 | 1  |
|                            | Total population with access to safe drinking water (SDG 6.1.1.)                         | %                                               | 97.9     | 0.958824 | 1  |
|                            | Drinking water quality (SDG 6.1.1.)                                                      | %                                               | 45.2     | 0.452    | 2  |
|                            | Proportion of safely treated domestic wastewater flows (SDG 6.3.1.)                      | %                                               | 24.3     | 0.238644 | 8  |
|                            | Degree of integrated water resources management implementation (SDG 6.5.1.)              | %                                               | 35       | 0.244186 | 3  |
|                            | Proportion of hydrological basins showing high surface water extent changes (SDG 6.6.1.) | %                                               | 0        | 1        | 3  |
|                            | Tap water price per GDP per capita                                                       | USD/10 <sup>3</sup> m <sup>3</sup> /(USD/inhab) | 0.085755 | 0.058693 | 9  |
|                            | Final point                                                                              | -                                               | -        | 0.530485 |    |
| <b>Argentina</b>           | Water use efficiency (SDG 6.4.1.)                                                        | USD/m <sup>3</sup>                              | 11.41247 | 0.372752 | 1  |
|                            | Water stress (SDG 6.4.2.)                                                                | %                                               | 10.45666 | 0.60669  | 1  |
|                            | Total population with access to safe drinking water (SDG 6.1.1.)                         | %                                               | 99.1     | 0.982353 | 1  |
|                            | Drinking water quality (SDG 6.1.1.)                                                      | %                                               | 59.5     | 0.595    | 2  |
|                            | Proportion of safely treated domestic wastewater flows (SDG 6.3.1.)                      | %                                               | 36.48388 | 0.361184 | 3  |
|                            | Degree of integrated water resources management implementation (SDG 6.5.1.)              | %                                               | 38       | 0.27907  | 3  |
|                            | Proportion of hydrological basins showing high surface water extent changes (SDG 6.6.1.) | %                                               | 29       | 0.71     | 3  |
|                            | Tap water price per GDP per capita                                                       | USD/10 <sup>3</sup> m <sup>3</sup> /(USD/inhab) | 0.121523 | 0.083174 | 10 |
|                            | Final point                                                                              | -                                               | -        | 0.498778 |    |
| <b>Armenia</b>             | Water use efficiency (SDG 6.4.1.)                                                        | USD/m <sup>3</sup>                              | 3.501538 | 0.213273 | 1  |
|                            | Water stress (SDG 6.4.2.)                                                                | %                                               | 57.09098 | 0.432405 | 1  |
|                            | Total population with access to safe drinking water (SDG 6.1.1.)                         | %                                               | 100      | 1        | 1  |
|                            | Drinking water quality (SDG 6.1.1.)                                                      | %                                               | 61.7     | 0.617    | 2  |
|                            | Proportion of safely treated domestic wastewater flows (SDG 6.3.1.)                      | %                                               | 40.08308 | 0.397383 | 3  |
|                            | Degree of integrated water resources management implementation (SDG 6.5.1.)              | %                                               | 52       | 0.44186  | 3  |
|                            | Proportion of hydrological basins showing high surface water extent                      | %                                               | 33       | 0.67     | 3  |

|                   |                                                                                          |                                                 |          |          |    |
|-------------------|------------------------------------------------------------------------------------------|-------------------------------------------------|----------|----------|----|
|                   | changes (SDG 6.6.1.)                                                                     |                                                 |          |          |    |
|                   | Tap water price per GDP per capita                                                       | USD/10 <sup>3</sup> m <sup>3</sup> /(USD/inhab) | 0.084388 | 0.057757 | 11 |
|                   | Final point                                                                              | USD/m <sup>3</sup>                              | -        | 0.47871  |    |
| <b>Australia</b>  | Water use efficiency (SDG 6.4.1.)                                                        | %                                               | 90.26082 | 0.651889 | 1  |
|                   | Water stress (SDG 6.4.2.)                                                                | %                                               | 3.474065 | 0.719831 | 1  |
|                   | Total population with access to safe drinking water (SDG 6.1.1.)                         | %                                               | 100      | 1        | 1  |
|                   | Drinking water quality (SDG 6.1.1.)                                                      | %                                               | 81.2     | 0.812    | 2  |
|                   | Proportion of safely treated domestic wastewater flows (SDG 6.3.1.)                      | %                                               | 76.1718  | 0.760347 | 3  |
|                   | Degree of integrated water resources management implementation (SDG 6.5.1.)              | USD/10 <sup>3</sup> m <sup>3</sup> /(USD/inhab) | 88       | 0.860465 | 3  |
|                   | Proportion of hydrological basins showing high surface water extent changes (SDG 6.6.1.) | USD/m <sup>3</sup>                              | 21       | 0.79     | 3  |
|                   | Tap water price per GDP per capita                                                       | %                                               | 0.068431 | 0.046836 | 10 |
|                   | Final point                                                                              | -                                               | -        | 0.705171 |    |
| <b>Austria</b>    | Water use efficiency (SDG 6.4.1.)                                                        | USD/m <sup>3</sup>                              | 98.08646 | 0.663112 | 1  |
|                   | Water stress (SDG 6.4.2.)                                                                | %                                               | 9.643548 | 0.615001 | 1  |
|                   | Total population with access to safe drinking water (SDG 6.1.1.)                         | %                                               | 100      | 1        | 1  |
|                   | Drinking water quality (SDG 6.1.1.)                                                      | %                                               | 100      | 1        | 2  |
|                   | Proportion of safely treated domestic wastewater flows (SDG 6.3.1.)                      | %                                               | 98.59576 | 0.985877 | 3  |
|                   | Degree of integrated water resources management implementation (SDG 6.5.1.)              | %                                               | 91       | 0.895349 | 3  |
|                   | Proportion of hydrological basins showing high surface water extent changes (SDG 6.6.1.) | %                                               | 10       | 0.9      | 3  |
|                   | Tap water price per GDP per capita                                                       | USD/10 <sup>3</sup> m <sup>3</sup> /(USD/inhab) | 0.063818 | 0.043679 | 10 |
|                   | Final point                                                                              | -                                               | -        | 0.762877 |    |
| <b>Azerbaijan</b> | Water use efficiency (SDG 6.4.1.)                                                        | USD/m <sup>3</sup>                              | 3.630141 | 0.218141 | 1  |
|                   | Water stress (SDG 6.4.2.)                                                                | %                                               | 55.59726 | 0.435127 | 1  |
|                   | Total population with access to safe drinking water (SDG 6.1.1.)                         | %                                               | 87       | 0.745098 | 1  |
|                   | Drinking water quality (SDG 6.1.1.)                                                      | %                                               | 46.5     | 0.465    | 2  |
|                   | Proportion of safely treated domestic wastewater flows (SDG 6.3.1.)                      | %                                               | 57.39653 | 0.571514 | 3  |
|                   | Degree of integrated water resources management implementation (SDG 6.5.1.)              | %                                               | 57       | 0.5      | 3  |
|                   | Proportion of hydrological basins showing high surface water extent                      | %                                               | 18       | 0.82     | 3  |

|                   |                                                                                          |                                                 |          |          |    |
|-------------------|------------------------------------------------------------------------------------------|-------------------------------------------------|----------|----------|----|
|                   | changes (SDG 6.6.1.)                                                                     |                                                 |          |          |    |
|                   | Tap water price per GDP per capita                                                       | USD/10 <sup>3</sup> m <sup>3</sup> /(USD/inhab) | 0.099947 | 0.068406 | 12 |
|                   | Final point                                                                              | -                                               | -        | 0.477911 |    |
| <b>Bahrain</b>    | Water use efficiency (SDG 6.4.1.)                                                        | USD/m <sup>3</sup>                              | 74.72671 | 0.626396 | 1  |
|                   | Water stress (SDG 6.4.2.)                                                                | %                                               | 133.7069 | 0.345026 | 1  |
|                   | Total population with access to safe drinking water (SDG 6.1.1.)                         | %                                               | 100      | 1        | 1  |
|                   | Drinking water quality (SDG 6.1.1.)                                                      | %                                               | 50.1     | 0.501    | 2  |
|                   | Proportion of safely treated domestic wastewater flows (SDG 6.3.1.)                      | %                                               | 95.62908 | 0.956039 | 3  |
|                   | Degree of integrated water resources management implementation (SDG 6.5.1.)              | %                                               | 39       | 0.290698 | 3  |
|                   | Proportion of hydrological basins showing high surface water extent changes (SDG 6.6.1.) | %                                               | 100      | 0        | 3  |
|                   | Tap water price per GDP per capita                                                       | USD/10 <sup>3</sup> m <sup>3</sup> /(USD/inhab) | 0.011543 | 0.007901 | 13 |
|                   | Final point                                                                              | -                                               | -        | 0.465883 |    |
| <b>Bangladesh</b> | Water use efficiency (SDG 6.4.1.)                                                        | USD/m <sup>3</sup>                              | 7.093474 | 0.308565 | 1  |
|                   | Water stress (SDG 6.4.2.)                                                                | %                                               | 5.723339 | 0.668572 | 1  |
|                   | Total population with access to safe drinking water (SDG 6.1.1.)                         | %                                               | 86.9     | 0.743137 | 1  |
|                   | Drinking water quality (SDG 6.1.1.)                                                      | %                                               | 26.9     | 0.269    | 2  |
|                   | Proportion of safely treated domestic wastewater flows (SDG 6.3.1.)                      | %                                               | 16.01109 | 0.155278 | 3  |
|                   | Degree of integrated water resources management implementation (SDG 6.5.1.)              | %                                               | 58       | 0.511628 | 3  |
|                   | Proportion of hydrological basins showing high surface water extent changes (SDG 6.6.1.) | %                                               | 25       | 0.75     | 3  |
|                   | Tap water price per GDP per capita                                                       | USD/10 <sup>3</sup> m <sup>3</sup> /(USD/inhab) | 0.069978 | 0.047894 | 14 |
|                   | Final point                                                                              | -                                               | -        | 0.431759 |    |
| <b>Barbados</b>   | Water use efficiency (SDG 6.4.1.)                                                        | USD/m <sup>3</sup>                              | 41.59415 | 0.547315 | 1  |
|                   | Water stress (SDG 6.4.2.)                                                                | %                                               | 87.5     | 0.388563 | 1  |
|                   | Total population with access to safe drinking water (SDG 6.1.1.)                         | %                                               | 99.7     | 0.994118 | 1  |
|                   | Drinking water quality (SDG 6.1.1.)                                                      | %                                               | 47.8     | 0.478    | 2  |
|                   | Proportion of safely treated domestic wastewater flows (SDG 6.3.1.)                      | %                                               | 2.8      | 0.022407 | 15 |
|                   | Degree of integrated water resources management implementation (SDG 6.5.1.)              | %                                               | 46       | 0.372093 | 3  |
|                   | Proportion of hydrological basins                                                        | %                                               | 100      | 0        | 3  |

|                |                                                                                          |                                                 |          |          |    |
|----------------|------------------------------------------------------------------------------------------|-------------------------------------------------|----------|----------|----|
|                | showing high surface water extent changes (SDG 6.6.1.)                                   |                                                 |          |          |    |
|                | Tap water price per GDP per capita                                                       | USD/10 <sup>3</sup> m <sup>3</sup> /(USD/inhab) | 0.150169 | 0.10278  | 16 |
|                | Final point                                                                              | -                                               | -        | 0.363159 |    |
| <b>Belarus</b> | Water use efficiency (SDG 6.4.1.)                                                        | USD/m <sup>3</sup>                              | 35.42654 | 0.525651 | 1  |
|                | Water stress (SDG 6.4.2.)                                                                | %                                               | 4.37706  | 0.696107 | 1  |
|                | Total population with access to safe drinking water (SDG 6.1.1.)                         | %                                               | 99.7     | 0.994118 | 1  |
|                | Drinking water quality (SDG 6.1.1.)                                                      | %                                               | 60.7     | 0.607    | 2  |
|                | Proportion of safely treated domestic wastewater flows (SDG 6.3.1.)                      | %                                               | 56.47111 | 0.562207 | 3  |
|                | Degree of integrated water resources management implementation (SDG 6.5.1.)              | %                                               | 54       | 0.465116 | 3  |
|                | Proportion of hydrological basins showing high surface water extent changes (SDG 6.6.1.) | %                                               | 6        | 0.94     | 3  |
|                | Tap water price per GDP per capita                                                       | USD/10 <sup>3</sup> m <sup>3</sup> /(USD/inhab) | 0.056452 | 0.038637 | 17 |
|                | Final point                                                                              | -                                               | -        | 0.603604 |    |
| <b>Belgium</b> | Water use efficiency (SDG 6.4.1.)                                                        | USD/m <sup>3</sup>                              | 97.49158 | 0.662291 | 1  |
|                | Water stress (SDG 6.4.2.)                                                                | %                                               | 51.58477 | 0.442818 | 1  |
|                | Total population with access to safe drinking water (SDG 6.1.1.)                         | %                                               | 100      | 1        | 1  |
|                | Drinking water quality (SDG 6.1.1.)                                                      | %                                               | 93       | 0.93     | 2  |
|                | Proportion of safely treated domestic wastewater flows (SDG 6.3.1.)                      | %                                               | 91.7866  | 0.917393 | 3  |
|                | Degree of integrated water resources management implementation (SDG 6.5.1.)              | %                                               | 82       | 0.790698 | 3  |
|                | Proportion of hydrological basins showing high surface water extent changes (SDG 6.6.1.) | %                                               | 25       | 0.75     | 3  |
|                | Tap water price per GDP per capita                                                       | USD/10 <sup>3</sup> m <sup>3</sup> /(USD/inhab) | 0.08528  | 0.058368 | 10 |
|                | Final point                                                                              | -                                               | -        | 0.693946 |    |
| <b>Belize</b>  | Water use efficiency (SDG 6.4.1.)                                                        | USD/m <sup>3</sup>                              | 11.52776 | 0.374109 | 1  |
|                | Water stress (SDG 6.4.2.)                                                                | %                                               | 1.260294 | 0.823943 | 1  |
|                | Total population with access to safe drinking water (SDG 6.1.1.)                         | %                                               | 99.5     | 0.990196 | 1  |
|                | Drinking water quality (SDG 6.1.1.)                                                      | %                                               | 39.6     | 0.396    | 2  |
|                | Proportion of safely treated domestic wastewater flows (SDG 6.3.1.)                      | %                                               | 17.2     | 0.167236 | 18 |
|                | Degree of integrated water resources management implementation (SDG 6.5.1.)              | %                                               | 21       | 0.081395 | 3  |



|                |                                                                                          |                                                 |          |          |    |
|----------------|------------------------------------------------------------------------------------------|-------------------------------------------------|----------|----------|----|
|                | Proportion of hydrological basins showing high surface water extent changes (SDG 6.6.1.) | %                                               | 0        | 1        | 3  |
|                | Tap water price per GDP per capita                                                       | USD/10 <sup>3</sup> m <sup>3</sup> /(USD/inhab) | 0.714693 | 0.489154 | 19 |
|                | Final point                                                                              | -                                               | -        | 0.540254 |    |
| <b>Benin</b>   | Water use efficiency (SDG 6.4.1.)                                                        | USD/m <sup>3</sup>                              | 39.55393 | 0.540526 | 1  |
|                | Water stress (SDG 6.4.2.)                                                                | %                                               | 0.975244 | 0.850271 | 1  |
|                | Total population with access to safe drinking water (SDG 6.1.1.)                         | %                                               | 77.9     | 0.566667 | 1  |
|                | Drinking water quality (SDG 6.1.1.)                                                      | %                                               | 13.6     | 0.136    | 2  |
|                | Proportion of safely treated domestic wastewater flows (SDG 6.3.1.)                      | %                                               | 4.3      | 0.037494 | 20 |
|                | Degree of integrated water resources management implementation (SDG 6.5.1.)              | %                                               | 68       | 0.627907 | 3  |
|                | Proportion of hydrological basins showing high surface water extent changes (SDG 6.6.1.) | %                                               | 41       | 0.59     | 3  |
|                | Tap water price per GDP per capita                                                       | USD/10 <sup>3</sup> m <sup>3</sup> /(USD/inhab) | 0.749474 | 0.512959 | 21 |
|                | Final point                                                                              | -                                               | -        | 0.482728 |    |
| <b>Bhutan</b>  | Water use efficiency (SDG 6.4.1.)                                                        | USD/m <sup>3</sup>                              | 6.069276 | 0.287517 | 1  |
|                | Water stress (SDG 6.4.2.)                                                                | %                                               | 1.413808 | 0.812142 | 1  |
|                | Total population with access to safe drinking water (SDG 6.1.1.)                         | %                                               | 100      | 1        | 1  |
|                | Drinking water quality (SDG 6.1.1.)                                                      | %                                               | 31.5     | 0.315    | 2  |
|                | Proportion of safely treated domestic wastewater flows (SDG 6.3.1.)                      | %                                               | 40.99144 | 0.406519 | 3  |
|                | Degree of integrated water resources management implementation (SDG 6.5.1.)              | %                                               | 33       | 0.22093  | 3  |
|                | Proportion of hydrological basins showing high surface water extent changes (SDG 6.6.1.) | %                                               | 12       | 0.88     | 3  |
|                | Tap water price per GDP per capita                                                       | USD/10 <sup>3</sup> m <sup>3</sup> /(USD/inhab) | 0.021753 | 0.014888 | 22 |
|                | Final point                                                                              | -                                               | -        | 0.492124 |    |
| <b>Bolivia</b> | Water use efficiency (SDG 6.4.1.)                                                        | USD/m <sup>3</sup>                              | 12.96865 | 0.390006 | 1  |
|                | Water stress (SDG 6.4.2.)                                                                | %                                               | 1.177001 | 0.830964 | 1  |
|                | Total population with access to safe drinking water (SDG 6.1.1.)                         | %                                               | 90       | 0.803922 | 1  |
|                | Drinking water quality (SDG 6.1.1.)                                                      | %                                               | 38.5     | 0.385    | 2  |
|                | Proportion of safely treated domestic wastewater flows (SDG 6.3.1.)                      | %                                               | 58.29204 | 0.580521 | 3  |
|                | Degree of integrated water resources management implementation (SDG 6.5.1.)              | %                                               | 52       | 0.44186  | 3  |

|                     |                                                                                          |                                                 |          |          |    |
|---------------------|------------------------------------------------------------------------------------------|-------------------------------------------------|----------|----------|----|
|                     | 6.5.1.)                                                                                  |                                                 |          |          |    |
|                     | Proportion of hydrological basins showing high surface water extent changes (SDG 6.6.1.) | %                                               | 16       | 0.84     | 3  |
|                     | Tap water price per GDP per capita                                                       | USD/10 <sup>3</sup> m <sup>3</sup> /(USD/inhab) | 0.102135 | 0.069904 | 23 |
|                     | Final point                                                                              | -                                               | -        | 0.542772 |    |
| <b>Brazil</b>       | Water use efficiency (SDG 6.4.1.)                                                        | USD/m <sup>3</sup>                              | 21.2887  | 0.456908 | 1  |
|                     | Water stress (SDG 6.4.2.)                                                                | %                                               | 1.479304 | 0.807492 | 1  |
|                     | Total population with access to safe drinking water (SDG 6.1.1.)                         | %                                               | 98.1     | 0.962745 | 1  |
|                     | Drinking water quality (SDG 6.1.1.)                                                      | %                                               | 45.2     | 0.452    | 2  |
|                     | Proportion of safely treated domestic wastewater flows (SDG 6.3.1.)                      | %                                               | 33.02745 | 0.326421 | 3  |
|                     | Degree of integrated water resources management implementation (SDG 6.5.1.)              | %                                               | 63       | 0.569767 | 3  |
|                     | Proportion of hydrological basins showing high surface water extent changes (SDG 6.6.1.) | %                                               | 21       | 0.79     | 3  |
|                     | Tap water price per GDP per capita                                                       | USD/10 <sup>3</sup> m <sup>3</sup> /(USD/inhab) | 0.213334 | 0.146011 | 10 |
|                     | Final point                                                                              | -                                               | -        | 0.563918 |    |
| <b>Bulgaria</b>     | Water use efficiency (SDG 6.4.1.)                                                        | USD/m <sup>3</sup>                              | 9.015027 | 0.340922 | 1  |
|                     | Water stress (SDG 6.4.2.)                                                                | %                                               | 37.5194  | 0.475508 | 1  |
|                     | Total population with access to safe drinking water (SDG 6.1.1.)                         | %                                               | 99.4     | 0.988235 | 1  |
|                     | Drinking water quality (SDG 6.1.1.)                                                      | %                                               | 58       | 0.58     | 2  |
|                     | Proportion of safely treated domestic wastewater flows (SDG 6.3.1.)                      | %                                               | 79.19239 | 0.790727 | 3  |
|                     | Degree of integrated water resources management implementation (SDG 6.5.1.)              | %                                               | 69       | 0.639535 | 3  |
|                     | Proportion of hydrological basins showing high surface water extent changes (SDG 6.6.1.) | %                                               | 8        | 0.92     | 3  |
|                     | Tap water price per GDP per capita                                                       | USD/10 <sup>3</sup> m <sup>3</sup> /(USD/inhab) | 0.140186 | 0.095947 | 24 |
|                     | Final point                                                                              | -                                               | -        | 0.603859 |    |
| <b>Burkina Faso</b> | Water use efficiency (SDG 6.4.1.)                                                        | USD/m <sup>3</sup>                              | 13.35886 | 0.394008 | 1  |
|                     | Water stress (SDG 6.4.2.)                                                                | %                                               | 7.820268 | 0.636519 | 1  |
|                     | Total population with access to safe drinking water (SDG 6.1.1.)                         | %                                               | 82.3     | 0.652941 | 1  |
|                     | Drinking water quality (SDG 6.1.1.)                                                      | %                                               | 7.9      | 0.079    | 2  |
|                     | Proportion of safely treated domestic wastewater flows (SDG 6.3.1.)                      | %                                               | 2.3      | 0.017379 | 25 |
|                     | Degree of integrated water resources                                                     | %                                               | 66       | 0.60465  | 3  |

|                                 |                                                                                          |                                                 |          |          |    |
|---------------------------------|------------------------------------------------------------------------------------------|-------------------------------------------------|----------|----------|----|
|                                 | management implementation (SDG 6.5.1.)                                                   |                                                 |          | 1        |    |
|                                 | Proportion of hydrological basins showing high surface water extent changes (SDG 6.6.1.) | %                                               | 42       | 0.58     | 3  |
|                                 | Tap water price per GDP per capita                                                       | USD/10 <sup>3</sup> m <sup>3</sup> /(USD/inhab) | 1.047025 | 0.716611 | 26 |
|                                 | Final point                                                                              | -                                               | -        | 0.460139 |    |
| <b>Cambodia</b>                 | Water use efficiency (SDG 6.4.1.)                                                        | USD/m <sup>3</sup>                              | 7.829129 | 0.321884 | 1  |
|                                 | Water stress (SDG 6.4.2.)                                                                | %                                               | 1.036545 | 0.844012 | 1  |
|                                 | Total population with access to safe drinking water (SDG 6.1.1.)                         | %                                               | 75.5     | 0.519608 | 1  |
|                                 | Drinking water quality (SDG 6.1.1.)                                                      | %                                               | 33.3     | 0.333    | 2  |
|                                 | Proportion of safely treated domestic wastewater flows (SDG 6.3.1.)                      | %                                               | 30.6     | 0.302007 | 27 |
|                                 | Degree of integrated water resources management implementation (SDG 6.5.1.)              | %                                               | 59       | 0.523256 | 3  |
|                                 | Proportion of hydrological basins showing high surface water extent changes (SDG 6.6.1.) | %                                               | 27       | 0.73     | 3  |
|                                 | Tap water price per GDP per capita                                                       | USD/10 <sup>3</sup> m <sup>3</sup> /(USD/inhab) | 0.185096 | 0.126684 | 28 |
|                                 | Final point                                                                              | -                                               | -        | 0.462556 |    |
| <b>Cameroon</b>                 | Water use efficiency (SDG 6.4.1.)                                                        | USD/m <sup>3</sup>                              | 25.04759 | 0.478856 | 1  |
|                                 | Water stress (SDG 6.4.2.)                                                                | %                                               | 1.56043  | 0.80201  | 1  |
|                                 | Total population with access to safe drinking water (SDG 6.1.1.)                         | %                                               | 75.6     | 0.521569 | 1  |
|                                 | Drinking water quality (SDG 6.1.1.)                                                      | %                                               | 7.5      | 0.075    | 2  |
|                                 | Proportion of safely treated domestic wastewater flows (SDG 6.3.1.)                      | %                                               | 8.3      | 0.077724 | 29 |
|                                 | Degree of integrated water resources management implementation (SDG 6.5.1.)              | %                                               | 40       | 0.302326 | 3  |
|                                 | Proportion of hydrological basins showing high surface water extent changes (SDG 6.6.1.) | %                                               | 47       | 0.53     | 3  |
|                                 | Tap water price per GDP per capita                                                       | USD/10 <sup>3</sup> m <sup>3</sup> /(USD/inhab) | 0.292879 | 0.200454 | 30 |
|                                 | Final point                                                                              | -                                               | -        | 0.373492 |    |
| <b>Central African Republic</b> | Water use efficiency (SDG 6.4.1.)                                                        | USD/m <sup>3</sup>                              | 17.59435 | 0.431181 | 1  |
|                                 | Water stress (SDG 6.4.2.)                                                                | %                                               | 0.335648 | 0.959789 | 1  |
|                                 | Total population with access to safe drinking water (SDG 6.1.1.)                         | %                                               | 68.5     | 0.382353 | 1  |
|                                 | Drinking water quality (SDG 6.1.1.)                                                      | %                                               | 0        | 0        | 2  |
|                                 | Proportion of safely treated domestic wastewater flows (SDG 6.3.1.)                      | %                                               | 0.57208  | 0        | 3  |
|                                 | Degree of integrated water resources                                                     | %                                               | 37       | 0.26744  | 3  |

|              |                                                                                          |                                                 |          |          |    |
|--------------|------------------------------------------------------------------------------------------|-------------------------------------------------|----------|----------|----|
|              | management implementation (SDG 6.5.1.)                                                   |                                                 |          | 2        |    |
|              | Proportion of hydrological basins showing high surface water extent changes (SDG 6.6.1.) | %                                               | 9        | 0.91     | 3  |
|              | Tap water price per GDP per capita                                                       | USD/10 <sup>3</sup> m <sup>3</sup> /(USD/inhab) | 1.351305 | 0.924867 | 31 |
|              | Final point                                                                              | -                                               | -        | 0.484454 |    |
| <b>Chad</b>  | Water use efficiency (SDG 6.4.1.)                                                        | USD/m <sup>3</sup>                              | 10.47027 | 0.361121 | 1  |
|              | Water stress (SDG 6.4.2.)                                                                | %                                               | 4.294922 | 0.698052 | 1  |
|              | Total population with access to safe drinking water (SDG 6.1.1.)                         | %                                               | 50.8     | 0.035294 | 1  |
|              | Drinking water quality (SDG 6.1.1.)                                                      | %                                               | 0        | 0        | 2  |
|              | Proportion of safely treated domestic wastewater flows (SDG 6.3.1.)                      | %                                               | 2.26226  | 0.016999 | 3  |
|              | Degree of integrated water resources management implementation (SDG 6.5.1.)              | %                                               | 37       | 0.267442 | 3  |
|              | Proportion of hydrological basins showing high surface water extent changes (SDG 6.6.1.) | %                                               | 7        | 0.93     | 3  |
|              | Tap water price per GDP per capita                                                       | USD/10 <sup>3</sup> m <sup>3</sup> /(USD/inhab) | 1.001374 | 0.685365 | 32 |
|              | Final point                                                                              | -                                               | -        | 0.374284 |    |
| <b>Chile</b> | Water use efficiency (SDG 6.4.1.)                                                        | USD/m <sup>3</sup>                              | 6.931974 | 0.305456 | 1  |
|              | Water stress (SDG 6.4.2.)                                                                | %                                               | 8.982121 | 0.622297 | 1  |
|              | Total population with access to safe drinking water (SDG 6.1.1.)                         | %                                               | 99       | 0.980392 | 1  |
|              | Drinking water quality (SDG 6.1.1.)                                                      | %                                               | 66.8     | 0.668    | 2  |
|              | Proportion of safely treated domestic wastewater flows (SDG 6.3.1.)                      | %                                               | 90.53275 | 0.904783 | 3  |
|              | Degree of integrated water resources management implementation (SDG 6.5.1.)              | %                                               | 32       | 0.209302 | 3  |
|              | Proportion of hydrological basins showing high surface water extent changes (SDG 6.6.1.) | %                                               | 34       | 0.66     | 3  |
|              | Tap water price per GDP per capita                                                       | USD/10 <sup>3</sup> m <sup>3</sup> /(USD/inhab) | 0.080866 | 0.055347 | 10 |
|              | Final point                                                                              | -                                               | -        | 0.550697 |    |
| <b>China</b> | Water use efficiency (SDG 6.4.1.)                                                        | USD/m <sup>3</sup>                              | 25.81486 | 0.482928 | 1  |
|              | Water stress (SDG 6.4.2.)                                                                | %                                               | 41.51853 | 0.465108 | 1  |
|              | Total population with access to safe drinking water (SDG 6.1.1.)                         | %                                               | 95.5     | 0.911765 | 1  |
|              | Drinking water quality (SDG 6.1.1.)                                                      | %                                               | 58.4     | 0.584    | 2  |
|              | Proportion of safely treated domestic wastewater flows (SDG 6.3.1.)                      | %                                               | 64.77986 | 0.645772 | 3  |

|                   |                                                                                          |                                                 |              |              |    |
|-------------------|------------------------------------------------------------------------------------------|-------------------------------------------------|--------------|--------------|----|
|                   | Degree of integrated water resources management implementation (SDG 6.5.1.)              | %                                               | 80           | 0.76744<br>2 | 3  |
|                   | Proportion of hydrological basins showing high surface water extent changes (SDG 6.6.1.) | %                                               | 37           | 0.63         | 3  |
|                   | Tap water price per GDP per capita                                                       | USD/10 <sup>3</sup> m <sup>3</sup> /(USD/inhab) | 0.05465<br>2 | 0.03740<br>5 | 10 |
|                   | Final point                                                                              | -                                               | -            | 0.56555<br>3 |    |
| <b>Colombia</b>   | Water use efficiency (SDG 6.4.1.)                                                        | USD/m <sup>3</sup>                              | 8.63093<br>5 | 0.33504<br>5 | 1  |
|                   | Water stress (SDG 6.4.2.)                                                                | %                                               | 4.35863<br>3 | 0.69654      | 1  |
|                   | Total population with access to safe drinking water (SDG 6.1.1.)                         | %                                               | 91.4         | 0.83137<br>3 | 1  |
|                   | Drinking water quality (SDG 6.1.1.)                                                      | %                                               | 50.1         | 0.501        | 2  |
|                   | Proportion of safely treated domestic wastewater flows (SDG 6.3.1.)                      | %                                               | 21.2628<br>1 | 0.20809<br>8 | 3  |
|                   | Degree of integrated water resources management implementation (SDG 6.5.1.)              | %                                               | 57           | 0.5          | 3  |
|                   | Proportion of hydrological basins showing high surface water extent changes (SDG 6.6.1.) | %                                               | 14           | 0.86         | 3  |
|                   | Tap water price per GDP per capita                                                       | USD/10 <sup>3</sup> m <sup>3</sup> /(USD/inhab) | 0.22127<br>3 | 0.15144<br>5 | 10 |
|                   | Final point                                                                              | -                                               | -            | 0.51043<br>8 |    |
| <b>Comoros</b>    | Water use efficiency (SDG 6.4.1.)                                                        | USD/m <sup>3</sup>                              | 70.0410<br>5 | 0.61765<br>6 | 1  |
|                   | Water stress (SDG 6.4.2.)                                                                | %                                               | 0.83333<br>3 | 0.86641<br>7 | 1  |
|                   | Total population with access to safe drinking water (SDG 6.1.1.)                         | %                                               | 90.1         | 0.80588<br>2 | 1  |
|                   | Drinking water quality (SDG 6.1.1.)                                                      | %                                               | 15.4         | 0.154        | 2  |
|                   | Proportion of safely treated domestic wastewater flows (SDG 6.3.1.)                      | %                                               | 5.6          | 0.05056<br>8 | 33 |
|                   | Degree of integrated water resources management implementation (SDG 6.5.1.)              | %                                               | 20           | 0.06976<br>7 | 3  |
|                   | Proportion of hydrological basins showing high surface water extent changes (SDG 6.6.1.) | %                                               | 100          | 0            | 3  |
|                   | Tap water price per GDP per capita                                                       | USD/10 <sup>3</sup> m <sup>3</sup> /(USD/inhab) | 0.14078      | 0.09635<br>4 | 34 |
|                   | Final point                                                                              | -                                               | -            | 0.33258<br>1 |    |
| <b>Costa Rica</b> | Water use efficiency (SDG 6.4.1.)                                                        | USD/m <sup>3</sup>                              | 17.4904<br>5 | 0.43038<br>1 | 1  |
|                   | Water stress (SDG 6.4.2.)                                                                | %                                               | 5.35167<br>2 | 0.67546<br>6 | 1  |
|                   | Total population with access to safe drinking water (SDG 6.1.1.)                         | %                                               | 97.8         | 0.95686<br>3 | 1  |
|                   | Drinking water quality (SDG 6.1.1.)                                                      | %                                               | 55.3         | 0.553        | 2  |
|                   | Proportion of safely treated domestic                                                    | %                                               | 23.2740      | 0.22832      | 3  |

|                      |                                                                                          |                                                 |          |          |    |
|----------------------|------------------------------------------------------------------------------------------|-------------------------------------------------|----------|----------|----|
|                      | wastewater flows (SDG 6.3.1.)                                                            |                                                 | 5        | 6        |    |
|                      | Degree of integrated water resources management implementation (SDG 6.5.1.)              | %                                               | 51       | 0.430233 | 3  |
|                      | Proportion of hydrological basins showing high surface water extent changes (SDG 6.6.1.) | %                                               | 58       | 0.42     | 3  |
|                      | Tap water price per GDP per capita                                                       | USD/10 <sup>3</sup> m <sup>3</sup> /(USD/inhab) | 0.073695 | 0.050439 | 35 |
|                      | Final point                                                                              | -                                               | -        | 0.468088 |    |
| <b>Côte d'Ivoire</b> | Water use efficiency (SDG 6.4.1.)                                                        | USD/m <sup>3</sup>                              | 38.51349 | 0.536928 | 1  |
|                      | Water stress (SDG 6.4.2.)                                                                | %                                               | 5.087566 | 0.680662 | 1  |
|                      | Total population with access to safe drinking water (SDG 6.1.1.)                         | %                                               | 81.9     | 0.645098 | 1  |
|                      | Drinking water quality (SDG 6.1.1.)                                                      | %                                               | 17       | 0.17     | 2  |
|                      | Proportion of safely treated domestic wastewater flows (SDG 6.3.1.)                      | %                                               | 14.2     | 0.137063 | 36 |
|                      | Degree of integrated water resources management implementation (SDG 6.5.1.)              | %                                               | 40       | 0.302326 | 3  |
|                      | Proportion of hydrological basins showing high surface water extent changes (SDG 6.6.1.) | %                                               | 20       | 0.8      | 3  |
|                      | Tap water price per GDP per capita                                                       | USD/10 <sup>3</sup> m <sup>3</sup> /(USD/inhab) | 0.21571  | 0.147637 | 37 |
|                      | Final point                                                                              | -                                               | -        | 0.427464 |    |
| <b>Croatia</b>       | Water use efficiency (SDG 6.4.1.)                                                        | USD/m <sup>3</sup>                              | 34.47009 | 0.521956 | 1  |
|                      | Water stress (SDG 6.4.2.)                                                                | %                                               | 1.478435 | 0.807552 | 1  |
|                      | Total population with access to safe drinking water (SDG 6.1.1.)                         | %                                               | 99.6     | 0.992157 | 1  |
|                      | Drinking water quality (SDG 6.1.1.)                                                      | %                                               | 63.3     | 0.633    | 2  |
|                      | Proportion of safely treated domestic wastewater flows (SDG 6.3.1.)                      | %                                               | 60.32014 | 0.600918 | 3  |
|                      | Degree of integrated water resources management implementation (SDG 6.5.1.)              | %                                               | 90       | 0.883721 | 3  |
|                      | Proportion of hydrological basins showing high surface water extent changes (SDG 6.6.1.) | %                                               | 5        | 0.95     | 3  |
|                      | Tap water price per GDP per capita                                                       | USD/10 <sup>3</sup> m <sup>3</sup> /(USD/inhab) | 0.132766 | 0.090869 | 10 |
|                      | Final point                                                                              | -                                               | -        | 0.685022 |    |
| <b>Cuba</b>          | Water use efficiency (SDG 6.4.1.)                                                        | USD/m <sup>3</sup>                              | 11.18823 | 0.370073 | 1  |
|                      | Water stress (SDG 6.4.2.)                                                                | %                                               | 23.93945 | 0.521644 | 1  |
|                      | Total population with access to safe drinking water (SDG 6.1.1.)                         | %                                               | 94.9     | 0.9      | 1  |
|                      | Drinking water quality (SDG 6.1.1.)                                                      | %                                               | 46       | 0.46     | 2  |

|                    |                                                                                          |                                                 |              |              |    |
|--------------------|------------------------------------------------------------------------------------------|-------------------------------------------------|--------------|--------------|----|
|                    | Proportion of safely treated domestic wastewater flows (SDG 6.3.1.)                      | %                                               | 24.1822<br>5 | 0.23746      | 3  |
|                    | Degree of integrated water resources management implementation (SDG 6.5.1.)              | %                                               | 82           | 0.79069<br>8 | 3  |
|                    | Proportion of hydrological basins showing high surface water extent changes (SDG 6.6.1.) | %                                               | 20           | 0.8          | 3  |
|                    | Tap water price per GDP per capita                                                       | USD/10 <sup>3</sup> m <sup>3</sup> /(USD/inhab) | 0.00422      | 0.00288<br>9 | 38 |
|                    | Final point                                                                              | -                                               | -            | 0.51034<br>5 |    |
| <b>Cyprus</b>      | Water use efficiency (SDG 6.4.1.)                                                        | USD/m <sup>3</sup>                              | 74.9417<br>4 | 0.62678<br>4 | 1  |
|                    | Water stress (SDG 6.4.2.)                                                                | %                                               | 37.5888<br>5 | 0.47531<br>8 | 1  |
|                    | Total population with access to safe drinking water (SDG 6.1.1.)                         | %                                               | 100          | 1            | 1  |
|                    | Drinking water quality (SDG 6.1.1.)                                                      | %                                               | 91.8         | 0.918        | 2  |
|                    | Proportion of safely treated domestic wastewater flows (SDG 6.3.1.)                      | %                                               | 67.1871<br>8 | 0.66998<br>4 | 3  |
|                    | Degree of integrated water resources management implementation (SDG 6.5.1.)              | %                                               | 93           | 0.91860<br>5 | 3  |
|                    | Proportion of hydrological basins showing high surface water extent changes (SDG 6.6.1.) | %                                               | 0            | 1            | 3  |
|                    | Tap water price per GDP per capita                                                       | USD/10 <sup>3</sup> m <sup>3</sup> /(USD/inhab) | 0.03519      | 0.02408<br>5 | 39 |
|                    | Final point                                                                              | -                                               | -            | 0.70409<br>7 |    |
| <b>Czechia</b>     | Water use efficiency (SDG 6.4.1.)                                                        | USD/m <sup>3</sup>                              | 132.473<br>4 | 0.70367<br>8 | 1  |
|                    | Water stress (SDG 6.4.2.)                                                                | %                                               | 20.7725<br>1 | 0.53621<br>3 | 1  |
|                    | Total population with access to safe drinking water (SDG 6.1.1.)                         | %                                               | 100          | 1            | 1  |
|                    | Drinking water quality (SDG 6.1.1.)                                                      | %                                               | 65.2         | 0.652        | 2  |
|                    | Proportion of safely treated domestic wastewater flows (SDG 6.3.1.)                      | %                                               | 90.1254<br>4 | 0.90068<br>6 | 3  |
|                    | Degree of integrated water resources management implementation (SDG 6.5.1.)              | %                                               | 80           | 0.76744<br>2 | 3  |
|                    | Proportion of hydrological basins showing high surface water extent changes (SDG 6.6.1.) | %                                               | 0            | 1            | 3  |
|                    | Tap water price per GDP per capita                                                       | USD/10 <sup>3</sup> m <sup>3</sup> /(USD/inhab) | 0.14840<br>3 | 0.10157<br>1 | 10 |
|                    | Final point                                                                              | -                                               | -            | 0.70769<br>9 |    |
| <b>D. R. Congo</b> | Water use efficiency (SDG 6.4.1.)                                                        | USD/m <sup>3</sup>                              | 50.8269<br>6 | 0.57437<br>4 | 1  |
|                    | Water stress (SDG 6.4.2.)                                                                | %                                               | 0.22688<br>4 | 1            | 1  |
|                    | Total population with access to safe drinking water (SDG 6.1.1.)                         | %                                               | 52.4         | 0.06666<br>7 | 1  |

|                           |                                                                                          |                                                 |              |              |    |
|---------------------------|------------------------------------------------------------------------------------------|-------------------------------------------------|--------------|--------------|----|
|                           | Drinking water quality (SDG 6.1.1.)                                                      | %                                               | 13.4         | 0.134        | 2  |
|                           | Proportion of safely treated domestic wastewater flows (SDG 6.3.1.)                      | %                                               | 12.2604<br>2 | 0.11755<br>6 | 3  |
|                           | Degree of integrated water resources management implementation (SDG 6.5.1.)              | %                                               | 32           | 0.20930<br>2 | 3  |
|                           | Proportion of hydrological basins showing high surface water extent changes (SDG 6.6.1.) | %                                               | 18           | 0.82         | 3  |
|                           | Tap water price per GDP per capita                                                       | USD/10 <sup>3</sup> m <sup>3</sup> /(USD/inhab) | 1.00813<br>6 | 0.68999<br>4 | 40 |
|                           | Final point                                                                              | -                                               | -            | 0.45148<br>7 |    |
| <b>Denmark</b>            | Water use efficiency (SDG 6.4.1.)                                                        | USD/m <sup>3</sup>                              | 288.421<br>5 | 0.80869<br>8 | 1  |
|                           | Water stress (SDG 6.4.2.)                                                                | %                                               | 26.4042<br>7 | 0.51158<br>1 | 1  |
|                           | Total population with access to safe drinking water (SDG 6.1.1.)                         | %                                               | 100          | 1            | 1  |
|                           | Drinking water quality (SDG 6.1.1.)                                                      | %                                               | 95.8         | 0.958        | 2  |
|                           | Proportion of safely treated domestic wastewater flows (SDG 6.3.1.)                      | %                                               | 95.9420<br>1 | 0.95918<br>7 | 3  |
|                           | Degree of integrated water resources management implementation (SDG 6.5.1.)              | %                                               | 95           | 0.94186      | 3  |
|                           | Proportion of hydrological basins showing high surface water extent changes (SDG 6.6.1.) | %                                               | 14           | 0.86         | 3  |
|                           | Tap water price per GDP per capita                                                       | USD/10 <sup>3</sup> m <sup>3</sup> /(USD/inhab) | 0.07824<br>1 | 0.05355      | 10 |
|                           | Final point                                                                              | -                                               | -            | 0.76161      |    |
| <b>Dominican Republic</b> | Water use efficiency (SDG 6.4.1.)                                                        | USD/m <sup>3</sup>                              | 8.20475<br>5 | 0.32821      | 1  |
|                           | Water stress (SDG 6.4.2.)                                                                | %                                               | 39.5533<br>1 | 0.47008<br>7 | 1  |
|                           | Total population with access to safe drinking water (SDG 6.1.1.)                         | %                                               | 84.7         | 0.7          | 1  |
|                           | Drinking water quality (SDG 6.1.1.)                                                      | %                                               | 35.2         | 0.352        | 2  |
|                           | Proportion of safely treated domestic wastewater flows (SDG 6.3.1.)                      | %                                               | 20.4         | 0.19942      | 41 |
|                           | Degree of integrated water resources management implementation (SDG 6.5.1.)              | %                                               | 36           | 0.25581<br>4 | 3  |
|                           | Proportion of hydrological basins showing high surface water extent changes (SDG 6.6.1.) | %                                               | 0            | 1            | 3  |
|                           | Tap water price per GDP per capita                                                       | USD/10 <sup>3</sup> m <sup>3</sup> /(USD/inhab) | 0.10731<br>7 | 0.07345      | 10 |
|                           | Final point                                                                              | -                                               | -            | 0.42237<br>3 |    |
| <b>Ecuador</b>            | Water use efficiency (SDG 6.4.1.)                                                        | USD/m <sup>3</sup>                              | 8.52178<br>6 | 0.33332<br>7 | 1  |
|                           | Water stress (SDG 6.4.2.)                                                                | %                                               | 6.78235<br>3 | 0.65114      | 1  |
|                           | Total population with access to safe drinking water (SDG 6.1.1.)                         | %                                               | 86.9         | 0.74313<br>7 | 1  |



|                    |                                                                                          |                                                 |         |         |    |
|--------------------|------------------------------------------------------------------------------------------|-------------------------------------------------|---------|---------|----|
|                    | Drinking water quality (SDG 6.1.1.)                                                      | %                                               | 46.7    | 0.467   | 2  |
|                    | Proportion of safely treated domestic wastewater flows (SDG 6.3.1.)                      | %                                               | 31.1117 | 0.30715 | 3  |
|                    | Degree of integrated water resources management implementation (SDG 6.5.1.)              | %                                               | 38      | 0.27907 | 3  |
|                    | Proportion of hydrological basins showing high surface water extent changes (SDG 6.6.1.) | %                                               | 63      | 0.37    | 3  |
|                    | Tap water price per GDP per capita                                                       | USD/10 <sup>3</sup> m <sup>3</sup> /(USD/inhab) | 0.00071 | 0.00048 | 42 |
|                    | Final point                                                                              | -                                               | -       | 0.39391 | 5  |
| <b>Egypt</b>       | Water use efficiency (SDG 6.4.1.)                                                        | USD/m <sup>3</sup>                              | 4.87322 | 0.25789 | 1  |
|                    | Water stress (SDG 6.4.2.)                                                                | %                                               | 141.165 | 0.33945 | 1  |
|                    | Total population with access to safe drinking water (SDG 6.1.1.)                         | %                                               | 99.4    | 0.98823 | 1  |
|                    | Drinking water quality (SDG 6.1.1.)                                                      | %                                               | 36.7    | 0.367   | 2  |
|                    | Proportion of safely treated domestic wastewater flows (SDG 6.3.1.)                      | %                                               | 45.5452 | 0.45232 | 3  |
|                    | Degree of integrated water resources management implementation (SDG 6.5.1.)              | %                                               | 42      | 0.32558 | 3  |
|                    | Proportion of hydrological basins showing high surface water extent changes (SDG 6.6.1.) | %                                               | 18      | 0.82    | 3  |
|                    | Tap water price per GDP per capita                                                       | USD/10 <sup>3</sup> m <sup>3</sup> /(USD/inhab) | 0.02216 | 0.01517 | 10 |
|                    | Final point                                                                              | -                                               | -       | 0.44570 | 6  |
| <b>El Salvador</b> | Water use efficiency (SDG 6.4.1.)                                                        | USD/m <sup>3</sup>                              | 9.60232 | 0.34944 | 1  |
|                    | Water stress (SDG 6.4.2.)                                                                | %                                               | 2.42732 | 0.75664 | 1  |
|                    | Total population with access to safe drinking water (SDG 6.1.1.)                         | %                                               | 93.8    | 0.87843 | 1  |
|                    | Drinking water quality (SDG 6.1.1.)                                                      | %                                               | 40.8    | 0.408   | 2  |
|                    | Proportion of safely treated domestic wastewater flows (SDG 6.3.1.)                      | %                                               | 12.9498 | 0.12449 | 3  |
|                    | Degree of integrated water resources management implementation (SDG 6.5.1.)              | %                                               | 23      | 0.10465 | 3  |
|                    | Proportion of hydrological basins showing high surface water extent changes (SDG 6.6.1.) | %                                               | 20      | 0.8     | 3  |
|                    | Tap water price per GDP per capita                                                       | USD/10 <sup>3</sup> m <sup>3</sup> /(USD/inhab) | 0.06581 | 0.04504 | 43 |
|                    | Final point                                                                              | -                                               | -       | 0.43333 | 8  |
| <b>Estonia</b>     | Water use efficiency (SDG 6.4.1.)                                                        | USD/m <sup>3</sup>                              | 26.2878 | 0.48537 | 1  |
|                    | Water stress (SDG 6.4.2.)                                                                | %                                               | 9.23108 | 0.61949 | 1  |
|                    | Total population with access to safe                                                     | %                                               | 99.6    | 0.99215 | 1  |

|                 |                                                                                          |                                                 |         |         |    |
|-----------------|------------------------------------------------------------------------------------------|-------------------------------------------------|---------|---------|----|
|                 | drinking water (SDG 6.1.1.)                                                              |                                                 |         | 7       |    |
|                 | Drinking water quality (SDG 6.1.1.)                                                      | %                                               | 59.2    | 0.592   | 2  |
|                 | Proportion of safely treated domestic wastewater flows (SDG 6.3.1.)                      | %                                               | 91.0638 | 0.91012 | 3  |
|                 | Degree of integrated water resources management implementation (SDG 6.5.1.)              | %                                               | 2       | 4       | 3  |
|                 | Proportion of hydrological basins showing high surface water extent changes (SDG 6.6.1.) | %                                               | 85      | 0.82558 | 3  |
|                 | Tap water price per GDP per capita                                                       | USD/10 <sup>3</sup> m <sup>3</sup> /(USD/inhab) | 0.03895 | 0.02666 | 10 |
|                 | Final point                                                                              | -                                               | -       | 0.68142 | 4  |
| <b>Eswatini</b> | Water use efficiency (SDG 6.4.1.)                                                        | USD/m <sup>3</sup>                              | 3.45323 | 0.21139 | 1  |
|                 | Water stress (SDG 6.4.2.)                                                                | %                                               | 2       | 8       | 1  |
|                 | Total population with access to safe drinking water (SDG 6.1.1.)                         | %                                               | 77.5599 | 0.40094 | 1  |
|                 | Drinking water quality (SDG 6.1.1.)                                                      | %                                               | 1       | 4       | 1  |
|                 | Proportion of safely treated domestic wastewater flows (SDG 6.3.1.)                      | %                                               | 74.1    | 0.49215 | 1  |
|                 | Degree of integrated water resources management implementation (SDG 6.5.1.)              | %                                               | 12.2    | 0.122   | 2  |
|                 | Proportion of hydrological basins showing high surface water extent changes (SDG 6.6.1.) | %                                               | 17.9052 | 0.17432 | 3  |
|                 | Tap water price per GDP per capita                                                       | USD/10 <sup>3</sup> m <sup>3</sup> /(USD/inhab) | 6       | 9       | 3  |
|                 | Final point                                                                              | -                                               | 59      | 0.52325 | 6  |
|                 |                                                                                          |                                                 | 44      | 0.56    | 3  |
|                 |                                                                                          |                                                 | 1.46108 | 1       | 44 |
|                 |                                                                                          |                                                 | -       | 0.43551 |    |
| <b>Finland</b>  | Water use efficiency (SDG 6.4.1.)                                                        | USD/m <sup>3</sup>                              | 59.4263 | 0.59547 | 1  |
|                 | Water stress (SDG 6.4.2.)                                                                | %                                               | 1       | 2       | 1  |
|                 | Total population with access to safe drinking water (SDG 6.1.1.)                         | %                                               | 7.11406 | 0.64623 | 1  |
|                 | Drinking water quality (SDG 6.1.1.)                                                      | %                                               | 2       | 7       | 1  |
|                 | Proportion of safely treated domestic wastewater flows (SDG 6.3.1.)                      | %                                               | 100     | 1       | 2  |
|                 | Degree of integrated water resources management implementation (SDG 6.5.1.)              | %                                               | 100     | 1       | 2  |
|                 | Proportion of hydrological basins showing high surface water extent changes (SDG 6.6.1.) | %                                               | 92.2832 | 0.92238 | 3  |
|                 | Tap water price per GDP per capita                                                       | USD/10 <sup>3</sup> m <sup>3</sup> /(USD/inhab) | 9       | 9       | 3  |
|                 | Final point                                                                              | -                                               | 80      | 0.76744 | 2  |
|                 |                                                                                          |                                                 | 8       | 0.92    | 3  |
|                 |                                                                                          |                                                 | 0.05689 | 0.03894 | 10 |
|                 |                                                                                          |                                                 | 6       | 1       |    |
|                 |                                                                                          |                                                 | -       | 0.73631 |    |
| <b>France</b>   | Water use efficiency (SDG 6.4.1.)                                                        | USD/m <sup>3</sup>                              | 80.6080 | 0.63662 | 1  |
|                 | Water stress (SDG 6.4.2.)                                                                | %                                               | 3       | 3       | 1  |
|                 | Total population with access to safe                                                     | %                                               | 22.9992 | 0.52575 | 1  |
|                 |                                                                                          | %                                               | 8       | 7       | 1  |
|                 |                                                                                          | %                                               | 100     | 1       | 1  |

|                |                                                                                          |                                                 |         |         |    |
|----------------|------------------------------------------------------------------------------------------|-------------------------------------------------|---------|---------|----|
|                | drinking water (SDG 6.1.1.)                                                              |                                                 |         |         |    |
|                | Drinking water quality (SDG 6.1.1.)                                                      | %                                               | 93.8    | 0.938   | 2  |
|                | Proportion of safely treated domestic wastewater flows (SDG 6.3.1.)                      | %                                               | 92.5012 | 0.92458 | 3  |
|                | Degree of integrated water resources management implementation (SDG 6.5.1.)              | %                                               | 1       | 1       | 3  |
|                | Proportion of hydrological basins showing high surface water extent changes (SDG 6.6.1.) | %                                               | 100     | 1       | 3  |
|                | Tap water price per GDP per capita                                                       | USD/10 <sup>3</sup> m <sup>3</sup> /(USD/inhab) | 0.07957 | 0.05446 | 10 |
|                | Final point                                                                              | -                                               | -       | 0.75367 | 8  |
| <b>Gabon</b>   | Water use efficiency (SDG 6.4.1.)                                                        | USD/m <sup>3</sup>                              | 97.0381 | 0.66166 | 1  |
|                | Water stress (SDG 6.4.2.)                                                                | %                                               | 4       | 2       | 1  |
|                | Total population with access to safe drinking water (SDG 6.1.1.)                         | %                                               | 0.50216 | 0.91842 | 1  |
|                | Drinking water quality (SDG 6.1.1.)                                                      | %                                               | 6       | 4       | 1  |
|                | Proportion of safely treated domestic wastewater flows (SDG 6.3.1.)                      | %                                               | 93.2    | 0.86666 | 1  |
|                | Degree of integrated water resources management implementation (SDG 6.5.1.)              | %                                               | 27.2    | 0.272   | 2  |
|                | Proportion of hydrological basins showing high surface water extent changes (SDG 6.6.1.) | %                                               | 22.5    | 0.22054 | 45 |
|                | Tap water price per GDP per capita                                                       | USD/10 <sup>3</sup> m <sup>3</sup> /(USD/inhab) | 29      | 0.17441 | 3  |
|                | Final point                                                                              | -                                               | -       | 9       | 3  |
| <b>Gambia</b>  | Water use efficiency (SDG 6.4.1.)                                                        | USD/m <sup>3</sup>                              | 11.5158 | 0.37396 | 1  |
|                | Water stress (SDG 6.4.2.)                                                                | %                                               | 7       | 9       | 1  |
|                | Total population with access to safe drinking water (SDG 6.1.1.)                         | %                                               | 2.20965 | 0.76629 | 1  |
|                | Drinking water quality (SDG 6.1.1.)                                                      | %                                               | 6       | 1       | 1  |
|                | Proportion of safely treated domestic wastewater flows (SDG 6.3.1.)                      | %                                               | 90.2    | 0.80784 | 1  |
|                | Degree of integrated water resources management implementation (SDG 6.5.1.)              | %                                               | 19      | 0.19    | 2  |
|                | Proportion of hydrological basins showing high surface water extent changes (SDG 6.6.1.) | %                                               | 11.1489 | 0.10637 | 3  |
|                | Tap water price per GDP per capita                                                       | USD/10 <sup>3</sup> m <sup>3</sup> /(USD/inhab) | 8       | 8       | 3  |
|                | Final point                                                                              | -                                               | -       | 0.19767 | 4  |
| <b>Georgia</b> | Water use efficiency (SDG 6.4.1.)                                                        | USD/m <sup>3</sup>                              | 31      | 0.19767 | 3  |
|                | Water stress (SDG 6.4.2.)                                                                | %                                               | 0       | 1       | 3  |
|                | Total population with access to safe drinking water (SDG 6.1.1.)                         | %                                               | 0       | 1       | 3  |
|                | Drinking water quality (SDG 6.1.1.)                                                      | %                                               | 0       | 1       | 3  |
|                | Proportion of safely treated domestic wastewater flows (SDG 6.3.1.)                      | %                                               | 0       | 1       | 3  |
|                | Degree of integrated water resources management implementation (SDG 6.5.1.)              | %                                               | 0       | 1       | 3  |
|                | Proportion of hydrological basins showing high surface water extent changes (SDG 6.6.1.) | %                                               | 0       | 1       | 3  |
|                | Tap water price per GDP per capita                                                       | USD/10 <sup>3</sup> m <sup>3</sup> /(USD/inhab) | 0.40928 | 0.28012 | 47 |
|                | Final point                                                                              | -                                               | -       | 0.46528 | 5  |
| <b>Georgia</b> | Water use efficiency (SDG 6.4.1.)                                                        | USD/m <sup>3</sup>                              | 8.27103 | 0.32929 | 1  |
|                | Water stress (SDG 6.4.2.)                                                                | %                                               | 4       | 6       | 1  |
|                | Total population with access to safe drinking water (SDG 6.1.1.)                         | %                                               | 5.38671 | 0.67479 | 1  |
|                | Drinking water quality (SDG 6.1.1.)                                                      | %                                               | 5.38671 | 0.67479 | 1  |
|                | Proportion of safely treated domestic wastewater flows (SDG 6.3.1.)                      | %                                               | 5.38671 | 0.67479 | 1  |
|                | Degree of integrated water resources management implementation (SDG 6.5.1.)              | %                                               | 5.38671 | 0.67479 | 1  |
|                | Proportion of hydrological basins showing high surface water extent changes (SDG 6.6.1.) | %                                               | 5.38671 | 0.67479 | 1  |
|                | Tap water price per GDP per capita                                                       | USD/10 <sup>3</sup> m <sup>3</sup> /(USD/inhab) | 5.38671 | 0.67479 | 1  |
|                | Final point                                                                              | -                                               | -       | 0.67479 | 6  |

|                |                                                                                          |                                                 |          |          |    |
|----------------|------------------------------------------------------------------------------------------|-------------------------------------------------|----------|----------|----|
|                | Total population with access to safe drinking water (SDG 6.1.1.)                         | %                                               | 100      | 1        | 1  |
|                | Drinking water quality (SDG 6.1.1.)                                                      | %                                               | 52.3     | 0.523    | 2  |
|                | Proportion of safely treated domestic wastewater flows (SDG 6.3.1.)                      | %                                               | 45.9906  | 0.456798 | 3  |
|                | Degree of integrated water resources management implementation (SDG 6.5.1.)              | %                                               | 44       | 0.348837 | 3  |
|                | Proportion of hydrological basins showing high surface water extent changes (SDG 6.6.1.) | %                                               | 13       | 0.87     | 3  |
|                | Tap water price per GDP per capita                                                       | USD/10 <sup>3</sup> m <sup>3</sup> /(USD/inhab) | 0.050205 | 0.034361 | 48 |
|                | Final point                                                                              | -                                               | -        | 0.529636 |    |
| <b>Germany</b> | Water use efficiency (SDG 6.4.1.)                                                        | USD/m <sup>3</sup>                              | 108.4009 | 0.676609 | 1  |
|                | Water stress (SDG 6.4.2.)                                                                | %                                               | 33.50192 | 0.487136 | 1  |
|                | Total population with access to safe drinking water (SDG 6.1.1.)                         | %                                               | 100      | 1        | 1  |
|                | Drinking water quality (SDG 6.1.1.)                                                      | %                                               | 98.6     | 0.986    | 2  |
|                | Proportion of safely treated domestic wastewater flows (SDG 6.3.1.)                      | %                                               | 99.26206 | 0.992578 | 3  |
|                | Degree of integrated water resources management implementation (SDG 6.5.1.)              | %                                               | 89       | 0.872093 | 3  |
|                | Proportion of hydrological basins showing high surface water extent changes (SDG 6.6.1.) | %                                               | 0        | 1        | 3  |
|                | Tap water price per GDP per capita                                                       | USD/10 <sup>3</sup> m <sup>3</sup> /(USD/inhab) | 0.083209 | 0.05695  | 10 |
|                | Final point                                                                              | -                                               | -        | 0.758921 |    |
| <b>Ghana</b>   | Water use efficiency (SDG 6.4.1.)                                                        | USD/m <sup>3</sup>                              | 32.5847  | 0.514364 | 1  |
|                | Water stress (SDG 6.4.2.)                                                                | %                                               | 6.314734 | 0.658475 | 1  |
|                | Total population with access to safe drinking water (SDG 6.1.1.)                         | %                                               | 88.7     | 0.778431 | 1  |
|                | Drinking water quality (SDG 6.1.1.)                                                      | %                                               | 20.4     | 0.204    | 2  |
|                | Proportion of safely treated domestic wastewater flows (SDG 6.3.1.)                      | %                                               | 12.12577 | 0.116202 | 3  |
|                | Degree of integrated water resources management implementation (SDG 6.5.1.)              | %                                               | 57       | 0.5      | 3  |
|                | Proportion of hydrological basins showing high surface water extent changes (SDG 6.6.1.) | %                                               | 30       | 0.7      | 3  |
|                | Tap water price per GDP per capita                                                       | USD/10 <sup>3</sup> m <sup>3</sup> /(USD/inhab) | 0.65744  | 0.449968 | 10 |
|                | Final point                                                                              | -                                               | -        | 0.49018  |    |
| <b>Greece</b>  | Water use efficiency (SDG 6.4.1.)                                                        | USD/m <sup>3</sup>                              | 15.62959 | 0.415198 | 1  |
|                | Water stress (SDG 6.4.2.)                                                                | %                                               | 20.47744 | 0.537682 | 1  |

|                      |                                                                                          |                                                 |         |         |    |
|----------------------|------------------------------------------------------------------------------------------|-------------------------------------------------|---------|---------|----|
|                      | Total population with access to safe drinking water (SDG 6.1.1.)                         | %                                               | 100     | 1       | 1  |
|                      | Drinking water quality (SDG 6.1.1.)                                                      | %                                               | 100     | 1       | 2  |
|                      | Proportion of safely treated domestic wastewater flows (SDG 6.3.1.)                      | %                                               | 92.6510 | 0.92608 | 3  |
|                      | Degree of integrated water resources management implementation (SDG 6.5.1.)              | %                                               | 86      | 0.83720 | 3  |
|                      | Proportion of hydrological basins showing high surface water extent changes (SDG 6.6.1.) | %                                               | 14      | 0.86    | 3  |
|                      | Tap water price per GDP per capita                                                       | USD/10 <sup>3</sup> m <sup>3</sup> /(USD/inhab) | 0.07065 | 0.04835 | 10 |
|                      | Final point                                                                              | -                                               | -       | 0.70306 | 6  |
| <b>Guinea</b>        | Water use efficiency (SDG 6.4.1.)                                                        | USD/m <sup>3</sup>                              | 10.4684 | 0.36109 | 1  |
|                      | Water stress (SDG 6.4.2.)                                                                | %                                               | 1.36923 | 0.81543 | 1  |
|                      | Total population with access to safe drinking water (SDG 6.1.1.)                         | %                                               | 76.8    | 0.54509 | 1  |
|                      | Drinking water quality (SDG 6.1.1.)                                                      | %                                               | 11      | 0.11    | 2  |
|                      | Proportion of safely treated domestic wastewater flows (SDG 6.3.1.)                      | %                                               | 8       | 0.07470 | 49 |
|                      | Degree of integrated water resources management implementation (SDG 6.5.1.)              | %                                               | 25      | 0.12790 | 3  |
|                      | Proportion of hydrological basins showing high surface water extent changes (SDG 6.6.1.) | %                                               | 21      | 0.79    | 3  |
|                      | Tap water price per GDP per capita                                                       | USD/10 <sup>3</sup> m <sup>3</sup> /(USD/inhab) | 0.01695 | 0.01160 | 50 |
|                      | Final point                                                                              | -                                               | -       | 0.35448 | 1  |
| <b>Guinea-Bissau</b> | Water use efficiency (SDG 6.4.1.)                                                        | USD/m <sup>3</sup>                              | 4.67414 | 0.25226 | 1  |
|                      | Water stress (SDG 6.4.2.)                                                                | %                                               | 1.49572 | 0.80635 | 1  |
|                      | Total population with access to safe drinking water (SDG 6.1.1.)                         | %                                               | 79.3    | 0.59411 | 1  |
|                      | Drinking water quality (SDG 6.1.1.)                                                      | %                                               | 6.6     | 0.066   | 2  |
|                      | Proportion of safely treated domestic wastewater flows (SDG 6.3.1.)                      | %                                               | 21.4001 | 0.20947 | 3  |
|                      | Degree of integrated water resources management implementation (SDG 6.5.1.)              | %                                               | 19      | 0.05814 | 3  |
|                      | Proportion of hydrological basins showing high surface water extent changes (SDG 6.6.1.) | %                                               | 73      | 0.27    | 3  |
|                      | Tap water price per GDP per capita                                                       | USD/10 <sup>3</sup> m <sup>3</sup> /(USD/inhab) | 0.46394 | 0.31753 | 51 |
|                      | Final point                                                                              | -                                               | -       | 0.32173 | 6  |
| <b>Guyana</b>        | Water use efficiency (SDG 6.4.1.)                                                        | USD/m <sup>3</sup>                              | 3.92499 | 0.22868 | 1  |
|                      | Water stress (SDG 6.4.2.)                                                                | %                                               | 3.29840 | 0.72515 | 1  |

|                 |                                                                                          |                                                 |          |          |    |
|-----------------|------------------------------------------------------------------------------------------|-------------------------------------------------|----------|----------|----|
|                 |                                                                                          |                                                 | 2        | 9        |    |
|                 | Total population with access to safe drinking water (SDG 6.1.1.)                         | %                                               | 98.3     | 0.966667 | 1  |
|                 | Drinking water quality (SDG 6.1.1.)                                                      | %                                               | 32.6     | 0.326    | 2  |
|                 | Proportion of safely treated domestic wastewater flows (SDG 6.3.1.)                      | %                                               | 18.5     | 0.180311 | 52 |
|                 | Degree of integrated water resources management implementation (SDG 6.5.1.)              | %                                               | 19       | 0.05814  | 3  |
|                 | Proportion of hydrological basins showing high surface water extent changes (SDG 6.6.1.) | %                                               | 14       | 0.86     | 3  |
|                 | Tap water price per GDP per capita                                                       | USD/10 <sup>3</sup> m <sup>3</sup> /(USD/inhab) | 0.073318 | 0.050181 | 53 |
|                 | Final point                                                                              | -                                               | -        | 0.424392 |    |
| <b>Haiti</b>    | Water use efficiency (SDG 6.4.1.)                                                        | USD/m <sup>3</sup>                              | 7.918479 | 0.323416 | 1  |
|                 | Water stress (SDG 6.4.2.)                                                                | %                                               | 13.38379 | 0.581348 | 1  |
|                 | Total population with access to safe drinking water (SDG 6.1.1.)                         | %                                               | 57.7     | 0.170588 | 1  |
|                 | Drinking water quality (SDG 6.1.1.)                                                      | %                                               | 13.9     | 0.139    | 2  |
|                 | Proportion of safely treated domestic wastewater flows (SDG 6.3.1.)                      | %                                               | 10.7     | 0.101862 | 54 |
|                 | Degree of integrated water resources management implementation (SDG 6.5.1.)              | %                                               | 30       | 0.186047 | 3  |
|                 | Proportion of hydrological basins showing high surface water extent changes (SDG 6.6.1.) | %                                               | 0        | 1        | 3  |
|                 | Tap water price per GDP per capita                                                       | USD/10 <sup>3</sup> m <sup>3</sup> /(USD/inhab) | 0.242682 | 0.166098 | 55 |
|                 | Final point                                                                              | -                                               | -        | 0.333545 |    |
| <b>Honduras</b> | Water use efficiency (SDG 6.4.1.)                                                        | USD/m <sup>3</sup>                              | 11.7972  | 0.377227 | 1  |
|                 | Water stress (SDG 6.4.2.)                                                                | %                                               | 4.621269 | 0.690533 | 1  |
|                 | Total population with access to safe drinking water (SDG 6.1.1.)                         | %                                               | 91.2     | 0.827451 | 1  |
|                 | Drinking water quality (SDG 6.1.1.)                                                      | %                                               | 30.9     | 0.309    | 2  |
|                 | Proportion of safely treated domestic wastewater flows (SDG 6.3.1.)                      | %                                               | 30.2     | 0.297984 | 56 |
|                 | Degree of integrated water resources management implementation (SDG 6.5.1.)              | %                                               | 25       | 0.127907 | 3  |
|                 | Proportion of hydrological basins showing high surface water extent changes (SDG 6.6.1.) | %                                               | 25       | 0.75     | 3  |
|                 | Tap water price per GDP per capita                                                       | USD/10 <sup>3</sup> m <sup>3</sup> /(USD/inhab) | 0.236934 | 0.162164 | 57 |
|                 | Final point                                                                              | -                                               | -        | 0.442783 |    |
| <b>Hungary</b>  | Water use efficiency (SDG 6.4.1.)                                                        | USD/m <sup>3</sup>                              | 24.46197 | 0.475662 | 1  |

|                  |                                                                                          |                                                 |              |              |    |
|------------------|------------------------------------------------------------------------------------------|-------------------------------------------------|--------------|--------------|----|
|                  | Water stress (SDG 6.4.2.)                                                                | %                                               | 8.07012<br>1 | 0.63329      | 1  |
|                  | Total population with access to safe drinking water (SDG 6.1.1.)                         | %                                               | 100          | 1            | 1  |
|                  | Drinking water quality (SDG 6.1.1.)                                                      | %                                               | 60.6         | 0.606        | 2  |
|                  | Proportion of safely treated domestic wastewater flows (SDG 6.3.1.)                      | %                                               | 89.5642<br>2 | 0.89504<br>2 | 3  |
|                  | Degree of integrated water resources management implementation (SDG 6.5.1.)              | %                                               | 75           | 0.70930<br>2 | 3  |
|                  | Proportion of hydrological basins showing high surface water extent changes (SDG 6.6.1.) | %                                               | 0            | 1            | 3  |
|                  | Tap water price per GDP per capita                                                       | USD/10 <sup>3</sup> m <sup>3</sup> /(USD/inhab) | 0.08370<br>2 | 0.05728<br>8 | 10 |
|                  | Final point                                                                              | -                                               | -            | 0.67207<br>3 |    |
| <b>Iceland</b>   | Water use efficiency (SDG 6.4.1.)                                                        | USD/m <sup>3</sup>                              | 60.1698<br>9 | 0.59715<br>1 | 1  |
|                  | Water stress (SDG 6.4.2.)                                                                | %                                               | 0.39407<br>5 | 0.94331<br>1 | 1  |
|                  | Total population with access to safe drinking water (SDG 6.1.1.)                         | %                                               | 100          | 1            | 1  |
|                  | Drinking water quality (SDG 6.1.1.)                                                      | %                                               | 100          | 1            | 2  |
|                  | Proportion of safely treated domestic wastewater flows (SDG 6.3.1.)                      | %                                               | 73.4689<br>1 | 0.73316<br>3 | 3  |
|                  | Degree of integrated water resources management implementation (SDG 6.5.1.)              | %                                               | 69           | 0.63953<br>5 | 3  |
|                  | Proportion of hydrological basins showing high surface water extent changes (SDG 6.6.1.) | %                                               | 88           | 0.12         | 3  |
|                  | Tap water price per GDP per capita                                                       | USD/10 <sup>3</sup> m <sup>3</sup> /(USD/inhab) | 0.01319<br>8 | 0.00903<br>3 | 58 |
|                  | Final point                                                                              | -                                               | -            | 0.63027<br>4 |    |
| <b>India</b>     | Water use efficiency (SDG 6.4.1.)                                                        | USD/m <sup>3</sup>                              | 2.89131<br>9 | 0.18742<br>6 | 1  |
|                  | Water stress (SDG 6.4.2.)                                                                | %                                               | 66.4920<br>9 | 0.41675<br>3 | 1  |
|                  | Total population with access to safe drinking water (SDG 6.1.1.)                         | %                                               | 94.1         | 0.88431<br>4 | 1  |
|                  | Drinking water quality (SDG 6.1.1.)                                                      | %                                               | 18.2         | 0.182        | 2  |
|                  | Proportion of safely treated domestic wastewater flows (SDG 6.3.1.)                      | %                                               | 26.5577<br>2 | 0.26135<br>2 | 3  |
|                  | Degree of integrated water resources management implementation (SDG 6.5.1.)              | %                                               | 45           | 0.36046<br>5 | 3  |
|                  | Proportion of hydrological basins showing high surface water extent changes (SDG 6.6.1.) | %                                               | 22           | 0.78         | 3  |
|                  | Tap water price per GDP per capita                                                       | USD/10 <sup>3</sup> m <sup>3</sup> /(USD/inhab) | 0.13464<br>7 | 0.09215<br>6 | 10 |
|                  | Final point                                                                              | -                                               | -            | 0.39555<br>8 |    |
| <b>Indonesia</b> | Water use efficiency (SDG 6.4.1.)                                                        | USD/m <sup>3</sup>                              | 4.09385      | 0.23436      | 1  |

|             |                                                                                          |                                                 |              |              |    |
|-------------|------------------------------------------------------------------------------------------|-------------------------------------------------|--------------|--------------|----|
|             |                                                                                          |                                                 | 9            | 8            |    |
|             | Water stress (SDG 6.4.2.)                                                                | %                                               | 29.6965<br>5 | 0.49951<br>6 | 1  |
|             | Total population with access to safe drinking water (SDG 6.1.1.)                         | %                                               | 87.4         | 0.75294<br>1 | 1  |
|             | Drinking water quality (SDG 6.1.1.)                                                      | %                                               | 24.9         | 0.249        | 2  |
|             | Proportion of safely treated domestic wastewater flows (SDG 6.3.1.)                      | %                                               | 1            | 0.00430<br>4 | 59 |
|             | Degree of integrated water resources management implementation (SDG 6.5.1.)              | %                                               | 66           | 0.60465<br>1 | 3  |
|             | Proportion of hydrological basins showing high surface water extent changes (SDG 6.6.1.) | %                                               | 27           | 0.73         | 3  |
|             | Tap water price per GDP per capita                                                       | USD/10 <sup>3</sup> m <sup>3</sup> /(USD/inhab) | 0.19381<br>9 | 0.13265<br>5 | 10 |
|             | Final point                                                                              | -                                               | -            | 0.40092<br>9 |    |
| <b>Iran</b> |                                                                                          |                                                 |              |              |    |
|             | Water use efficiency (SDG 6.4.1.)                                                        | USD/m <sup>3</sup>                              | 4.02279<br>2 | 0.23200<br>5 | 1  |
|             | Water stress (SDG 6.4.2.)                                                                | %                                               | 81.2890<br>8 | 0.39612<br>2 | 1  |
|             | Total population with access to safe drinking water (SDG 6.1.1.)                         | %                                               | 96.2         | 0.92549      | 1  |
|             | Drinking water quality (SDG 6.1.1.)                                                      | %                                               | 48.8         | 0.488        | 2  |
|             | Proportion of safely treated domestic wastewater flows (SDG 6.3.1.)                      | %                                               | 22.0718<br>1 | 0.21623<br>4 | 3  |
|             | Degree of integrated water resources management implementation (SDG 6.5.1.)              | %                                               | 40           | 0.30232<br>6 | 3  |
|             | Proportion of hydrological basins showing high surface water extent changes (SDG 6.6.1.) | %                                               | 43           | 0.57         | 3  |
|             | Tap water price per GDP per capita                                                       | USD/10 <sup>3</sup> m <sup>3</sup> /(USD/inhab) | 0.00295<br>1 | 0.00202      | 60 |
|             | Final point                                                                              | -                                               | -            | 0.39152<br>5 |    |
| <b>Iraq</b> |                                                                                          |                                                 |              |              |    |
|             | Water use efficiency (SDG 6.4.1.)                                                        | USD/m <sup>3</sup>                              | 2.98457      | 0.19171      | 1  |
|             | Water stress (SDG 6.4.2.)                                                                | %                                               | 79.5140<br>4 | 0.39838<br>9 | 1  |
|             | Total population with access to safe drinking water (SDG 6.1.1.)                         | %                                               | 86.6         | 0.73725<br>5 | 1  |
|             | Drinking water quality (SDG 6.1.1.)                                                      | %                                               | 45.9         | 0.459        | 2  |
|             | Proportion of safely treated domestic wastewater flows (SDG 6.3.1.)                      | %                                               | 37.0878<br>3 | 0.36725<br>9 | 3  |
|             | Degree of integrated water resources management implementation (SDG 6.5.1.)              | %                                               | 38           | 0.27907      | 3  |
|             | Proportion of hydrological basins showing high surface water extent changes (SDG 6.6.1.) | %                                               | 20           | 0.8          | 3  |
|             | Tap water price per GDP per capita                                                       | USD/10 <sup>3</sup> m <sup>3</sup> /(USD/inhab) | 0.00217<br>1 | 0.00148<br>6 | 61 |
|             | Final point                                                                              | -                                               | -            | 0.40427<br>1 |    |



|                |                                                                                          |                                                 |              |              |    |
|----------------|------------------------------------------------------------------------------------------|-------------------------------------------------|--------------|--------------|----|
| <b>Ireland</b> | Water use efficiency (SDG 6.4.1.)                                                        | USD/m <sup>3</sup>                              | 236.169<br>7 | 0.78171<br>9 | 1  |
|                | Water stress (SDG 6.4.2.)                                                                | %                                               | 21.6404<br>5 | 0.53201      | 1  |
|                | Total population with access to safe drinking water (SDG 6.1.1.)                         | %                                               | 97.9         | 0.95882<br>4 | 1  |
|                | Drinking water quality (SDG 6.1.1.)                                                      | %                                               | 100          | 1            | 2  |
|                | Proportion of safely treated domestic wastewater flows (SDG 6.3.1.)                      | %                                               | 83.4170<br>5 | 0.83321<br>6 | 3  |
|                | Degree of integrated water resources management implementation (SDG 6.5.1.)              | %                                               | 81           | 0.77907      | 3  |
|                | Proportion of hydrological basins showing high surface water extent changes (SDG 6.6.1.) | %                                               | 78           | 0.22         | 3  |
|                | Tap water price per GDP per capita                                                       | USD/10 <sup>3</sup> m <sup>3</sup> /(USD/inhab) | 0.02365<br>2 | 0.01618<br>8 | 10 |
|                | Final point                                                                              | -                                               | -            | 0.64012<br>8 |    |
| <b>Israel</b>  | Water use efficiency (SDG 6.4.1.)                                                        | USD/m <sup>3</sup>                              | 134.145<br>9 | 0.70537<br>2 | 1  |
|                | Water stress (SDG 6.4.2.)                                                                | %                                               | 110.085<br>4 | 0.36498<br>6 | 1  |
|                | Total population with access to safe drinking water (SDG 6.1.1.)                         | %                                               | 100          | 1            | 1  |
|                | Drinking water quality (SDG 6.1.1.)                                                      | %                                               | 93.8         | 0.938        | 2  |
|                | Proportion of safely treated domestic wastewater flows (SDG 6.3.1.)                      | %                                               | 93.0949<br>7 | 0.93055<br>2 | 3  |
|                | Degree of integrated water resources management implementation (SDG 6.5.1.)              | %                                               | 85           | 0.82558<br>1 | 3  |
|                | Proportion of hydrological basins showing high surface water extent changes (SDG 6.6.1.) | %                                               | 8            | 0.92         | 3  |
|                | Tap water price per GDP per capita                                                       | USD/10 <sup>3</sup> m <sup>3</sup> /(USD/inhab) | 0.06357<br>2 | 0.04351      | 10 |
|                | Final point                                                                              | -                                               | -            | 0.716        |    |
| <b>Italy</b>   | Water use efficiency (SDG 6.4.1.)                                                        | USD/m <sup>3</sup>                              | 45.8802<br>4 | 0.56055<br>3 | 1  |
|                | Water stress (SDG 6.4.2.)                                                                | %                                               | 29.6457<br>8 | 0.49969<br>2 | 1  |
|                | Total population with access to safe drinking water (SDG 6.1.1.)                         | %                                               | 100          | 1            | 1  |
|                | Drinking water quality (SDG 6.1.1.)                                                      | %                                               | 97.8         | 0.978        | 2  |
|                | Proportion of safely treated domestic wastewater flows (SDG 6.3.1.)                      | %                                               | 94.7405<br>6 | 0.94710<br>3 | 3  |
|                | Degree of integrated water resources management implementation (SDG 6.5.1.)              | %                                               | 77           | 0.73255<br>8 | 3  |
|                | Proportion of hydrological basins showing high surface water extent changes (SDG 6.6.1.) | %                                               | 8            | 0.92         | 3  |
|                | Tap water price per GDP per capita                                                       | USD/10 <sup>3</sup> m <sup>3</sup> /(USD/inhab) | 0.04097<br>6 | 0.02804<br>5 | 10 |
|                | Final point                                                                              | -                                               | -            | 0.70824<br>4 |    |

|                |                                                                                          |                                                 |              |              |    |
|----------------|------------------------------------------------------------------------------------------|-------------------------------------------------|--------------|--------------|----|
| <b>Jamaica</b> | Water use efficiency (SDG 6.4.1.)                                                        | USD/m <sup>3</sup>                              | 8.11532      | 0.32673      | 1  |
|                | Water stress (SDG 6.4.2.)                                                                | %                                               | 12.4734<br>4 | 0.58858<br>1 | 1  |
|                | Total population with access to safe drinking water (SDG 6.1.1.)                         | %                                               | 93.8         | 0.87843<br>1 | 1  |
|                | Drinking water quality (SDG 6.1.1.)                                                      | %                                               | 47.3         | 0.473        | 2  |
|                | Proportion of safely treated domestic wastewater flows (SDG 6.3.1.)                      | %                                               | 13.7         | 0.13203<br>5 | 62 |
|                | Degree of integrated water resources management implementation (SDG 6.5.1.)              | %                                               | 50           | 0.41860<br>5 | 3  |
|                | Proportion of hydrological basins showing high surface water extent changes (SDG 6.6.1.) | %                                               | 0            | 1            | 3  |
|                | Tap water price per GDP per capita                                                       | USD/10 <sup>3</sup> m <sup>3</sup> /(USD/inhab) | 0.36874<br>1 | 0.25237<br>6 | 63 |
|                | Final point                                                                              | -                                               | -            | 0.50872      |    |
| <b>Japan</b>   | Water use efficiency (SDG 6.4.1.)                                                        | USD/m <sup>3</sup>                              | 55.4168<br>5 | 0.58604<br>4 | 1  |
|                | Water stress (SDG 6.4.2.)                                                                | %                                               | 36.0459<br>8 | 0.47962<br>1 | 1  |
|                | Total population with access to safe drinking water (SDG 6.1.1.)                         | %                                               | 100          | 1            | 1  |
|                | Drinking water quality (SDG 6.1.1.)                                                      | %                                               | 91.7         | 0.917        | 2  |
|                | Proportion of safely treated domestic wastewater flows (SDG 6.3.1.)                      | %                                               | 97.8172<br>2 | 0.97804<br>7 | 3  |
|                | Degree of integrated water resources management implementation (SDG 6.5.1.)              | %                                               | 95           | 0.94186      | 3  |
|                | Proportion of hydrological basins showing high surface water extent changes (SDG 6.6.1.) | %                                               | 3            | 0.97         | 3  |
|                | Tap water price per GDP per capita                                                       | USD/10 <sup>3</sup> m <sup>3</sup> /(USD/inhab) | 0.04351<br>1 | 0.02978      | 10 |
|                | Final point                                                                              | -                                               | -            | 0.73779<br>4 |    |
| <b>Jordan</b>  | Water use efficiency (SDG 6.4.1.)                                                        | USD/m <sup>3</sup>                              | 32.5849<br>9 | 0.51436<br>5 | 1  |
|                | Water stress (SDG 6.4.2.)                                                                | %                                               | 104.312<br>8 | 0.37051<br>7 | 1  |
|                | Total population with access to safe drinking water (SDG 6.1.1.)                         | %                                               | 96.9         | 0.93921<br>6 | 1  |
|                | Drinking water quality (SDG 6.1.1.)                                                      | %                                               | 54.4         | 0.544        | 2  |
|                | Proportion of safely treated domestic wastewater flows (SDG 6.3.1.)                      | %                                               | 81.9964<br>1 | 0.81892<br>8 | 3  |
|                | Degree of integrated water resources management implementation (SDG 6.5.1.)              | %                                               | 64           | 0.58139<br>5 | 3  |
|                | Proportion of hydrological basins showing high surface water extent changes (SDG 6.6.1.) | %                                               | 35           | 0.65         | 3  |
|                | Tap water price per GDP per capita                                                       | USD/10 <sup>3</sup> m <sup>3</sup> /(USD/inhab) | 0.24050<br>1 | 0.16460<br>5 | 10 |
|                | Final point                                                                              | -                                               | -            | 0.57287<br>8 |    |

|                   |                                                                                          |                                                 |              |              |    |
|-------------------|------------------------------------------------------------------------------------------|-------------------------------------------------|--------------|--------------|----|
| <b>Kazakhstan</b> | Water use efficiency (SDG 6.4.1.)                                                        | USD/m <sup>3</sup>                              | 7.42306<br>2 | 0.31469<br>5 | 1  |
|                   | Water stress (SDG 6.4.2.)                                                                | %                                               | 34.0984<br>7 | 0.48532<br>4 | 1  |
|                   | Total population with access to safe drinking water (SDG 6.1.1.)                         | %                                               | 92.9         | 0.86078<br>4 | 1  |
|                   | Drinking water quality (SDG 6.1.1.)                                                      | %                                               | 56           | 0.56         | 2  |
|                   | Proportion of safely treated domestic wastewater flows (SDG 6.3.1.)                      | %                                               | 35.6698<br>2 | 0.35299<br>7 | 3  |
|                   | Degree of integrated water resources management implementation (SDG 6.5.1.)              | %                                               | 46           | 0.37209<br>3 | 3  |
|                   | Proportion of hydrological basins showing high surface water extent changes (SDG 6.6.1.) | %                                               | 33           | 0.67         | 3  |
|                   | Tap water price per GDP per capita                                                       | USD/10 <sup>3</sup> m <sup>3</sup> /(USD/inhab) | 0.01426<br>8 | 0.00976<br>5 | 64 |
|                   | Final point                                                                              | -                                               | -            | 0.45320<br>7 |    |
| <b>Kuwait</b>     | Water use efficiency (SDG 6.4.1.)                                                        | USD/m <sup>3</sup>                              | 95.9473<br>7 | 0.66013<br>6 | 1  |
|                   | Water stress (SDG 6.4.2.)                                                                | %                                               | 3850.5       | 0            | 1  |
|                   | Total population with access to safe drinking water (SDG 6.1.1.)                         | %                                               | 99           | 0.98039<br>2 | 1  |
|                   | Drinking water quality (SDG 6.1.1.)                                                      | %                                               | 57.2         | 0.572        | 2  |
|                   | Proportion of safely treated domestic wastewater flows (SDG 6.3.1.)                      | %                                               | 84.7         | 0.84612      | 3  |
|                   | Degree of integrated water resources management implementation (SDG 6.5.1.)              | %                                               | 94           | 0.93023<br>3 | 3  |
|                   | Proportion of hydrological basins showing high surface water extent changes (SDG 6.6.1.) | %                                               | 60           | 0.4          | 3  |
|                   | Tap water price per GDP per capita                                                       | USD/10 <sup>3</sup> m <sup>3</sup> /(USD/inhab) | 0.03103<br>7 | 0.02124<br>3 | 10 |
|                   | Final point                                                                              | -                                               | -            | 0.55126<br>5 |    |
| <b>Kyrgyzstan</b> | Water use efficiency (SDG 6.4.1.)                                                        | USD/m <sup>3</sup>                              | 0.85529<br>2 | 0.02301<br>7 | 1  |
|                   | Water stress (SDG 6.4.2.)                                                                | %                                               | 50.0389<br>6 | 0.44594<br>2 | 1  |
|                   | Total population with access to safe drinking water (SDG 6.1.1.)                         | %                                               | 90           | 0.80392<br>2 | 1  |
|                   | Drinking water quality (SDG 6.1.1.)                                                      | %                                               | 47.3         | 0.473        | 2  |
|                   | Proportion of safely treated domestic wastewater flows (SDG 6.3.1.)                      | %                                               | 18.8934<br>1 | 0.18426<br>7 | 3  |
|                   | Degree of integrated water resources management implementation (SDG 6.5.1.)              | %                                               | 31           | 0.19767<br>4 | 3  |
|                   | Proportion of hydrological basins showing high surface water extent changes (SDG 6.6.1.) | %                                               | 24           | 0.76         | 3  |
|                   | Tap water price per GDP per capita                                                       | USD/10 <sup>3</sup> m <sup>3</sup> /(USD/inhab) | 0.05228<br>8 | 0.03578<br>8 | 65 |
|                   | Final point                                                                              | -                                               | -            | 0.36545<br>1 |    |

|                |                                                                                          |                                                 |              |              |    |
|----------------|------------------------------------------------------------------------------------------|-------------------------------------------------|--------------|--------------|----|
| <b>Laos</b>    | Water use efficiency (SDG 6.4.1.)                                                        | USD/m <sup>3</sup>                              | 2.05091<br>8 | 0.14107      | 1  |
|                | Water stress (SDG 6.4.2.)                                                                | %                                               | 4.79139<br>5 | 0.68682<br>1 | 1  |
|                | Total population with access to safe drinking water (SDG 6.1.1.)                         | %                                               | 75.7         | 0.52352<br>9 | 1  |
|                | Drinking water quality (SDG 6.1.1.)                                                      | %                                               | 26.1         | 0.261        | 2  |
|                | Proportion of safely treated domestic wastewater flows (SDG 6.3.1.)                      | %                                               | 10.0960<br>6 | 0.09578<br>8 | 3  |
|                | Degree of integrated water resources management implementation (SDG 6.5.1.)              | %                                               | 62           | 0.55814      | 3  |
|                | Proportion of hydrological basins showing high surface water extent changes (SDG 6.6.1.) | %                                               | 30           | 0.7          | 3  |
|                | Tap water price per GDP per capita                                                       | USD/10 <sup>3</sup> m <sup>3</sup> /(USD/inhab) | 0.04956<br>6 | 0.03392<br>4 | 66 |
|                | Final point                                                                              | -                                               | -            | 0.37503<br>4 |    |
| <b>Latvia</b>  | Water use efficiency (SDG 6.4.1.)                                                        | USD/m <sup>3</sup>                              | 135.593<br>5 | 0.70682      | 1  |
|                | Water stress (SDG 6.4.2.)                                                                | %                                               | 1.06783<br>1 | 0.84095<br>9 | 1  |
|                | Total population with access to safe drinking water (SDG 6.1.1.)                         | %                                               | 99.3         | 0.98627<br>5 | 1  |
|                | Drinking water quality (SDG 6.1.1.)                                                      | %                                               | 57.4         | 0.574        | 2  |
|                | Proportion of safely treated domestic wastewater flows (SDG 6.3.1.)                      | %                                               | 93.1452<br>3 | 0.93105<br>8 | 3  |
|                | Degree of integrated water resources management implementation (SDG 6.5.1.)              | %                                               | 62           | 0.55814      | 3  |
|                | Proportion of hydrological basins showing high surface water extent changes (SDG 6.6.1.) | %                                               | 0            | 1            | 3  |
|                | Tap water price per GDP per capita                                                       | USD/10 <sup>3</sup> m <sup>3</sup> /(USD/inhab) | 0.07386<br>5 | 0.05055<br>5 | 67 |
|                | Final point                                                                              | -                                               | -            | 0.70597<br>6 |    |
| <b>Lebanon</b> | Water use efficiency (SDG 6.4.1.)                                                        | USD/m <sup>3</sup>                              | 18.3096<br>5 | 0.43656      | 1  |
|                | Water stress (SDG 6.4.2.)                                                                | %                                               | 58.7929<br>9 | 0.42938<br>9 | 1  |
|                | Total population with access to safe drinking water (SDG 6.1.1.)                         | %                                               | 99           | 0.98039<br>2 | 1  |
|                | Drinking water quality (SDG 6.1.1.)                                                      | %                                               | 59.7         | 0.597        | 2  |
|                | Proportion of safely treated domestic wastewater flows (SDG 6.3.1.)                      | %                                               | 46.8         | 0.46493<br>9 | 68 |
|                | Degree of integrated water resources management implementation (SDG 6.5.1.)              | %                                               | 25           | 0.12790<br>7 | 3  |
|                | Proportion of hydrological basins showing high surface water extent changes (SDG 6.6.1.) | %                                               | 25           | 0.75         | 3  |
|                | Tap water price per GDP per capita                                                       | USD/10 <sup>3</sup> m <sup>3</sup> /(USD/inhab) | 0.02577<br>8 | 0.01764<br>3 | 10 |
|                | Final point                                                                              | -                                               | -            | 0.47547<br>9 |    |

|                  |                                                                                          |                                                 |              |              |    |
|------------------|------------------------------------------------------------------------------------------|-------------------------------------------------|--------------|--------------|----|
| <b>Lesotho</b>   | Water use efficiency (SDG 6.4.1.)                                                        | USD/m <sup>3</sup>                              | 43.3994<br>6 | 0.55305      | 1  |
|                  | Water stress (SDG 6.4.2.)                                                                | %                                               | 2.56590<br>5 | 0.75094<br>4 | 1  |
|                  | Total population with access to safe drinking water (SDG 6.1.1.)                         | %                                               | 81.8         | 0.64313<br>7 | 1  |
|                  | Drinking water quality (SDG 6.1.1.)                                                      | %                                               | 7.2          | 0.072        | 2  |
|                  | Proportion of safely treated domestic wastewater flows (SDG 6.3.1.)                      | %                                               | 2.3          | 0.01737<br>9 | 69 |
|                  | Degree of integrated water resources management implementation (SDG 6.5.1.)              | %                                               | 45           | 0.36046<br>5 | 3  |
|                  | Proportion of hydrological basins showing high surface water extent changes (SDG 6.6.1.) | %                                               | 20           | 0.8          | 3  |
|                  | Tap water price per GDP per capita                                                       | USD/10 <sup>3</sup> m <sup>3</sup> /(USD/inhab) | 0.91400<br>3 | 0.62556<br>7 | 70 |
|                  | Final point                                                                              | -                                               | -            | 0.47781<br>8 |    |
| <b>Liberia</b>   | Water use efficiency (SDG 6.4.1.)                                                        | USD/m <sup>3</sup>                              | 4.26510<br>1 | 0.23989<br>9 | 1  |
|                  | Water stress (SDG 6.4.2.)                                                                | %                                               | 0.26431<br>2 | 0.98432<br>2 | 1  |
|                  | Total population with access to safe drinking water (SDG 6.1.1.)                         | %                                               | 75.6         | 0.52156<br>9 | 1  |
|                  | Drinking water quality (SDG 6.1.1.)                                                      | %                                               | 9.5          | 0.095        | 2  |
|                  | Proportion of safely treated domestic wastewater flows (SDG 6.3.1.)                      | %                                               | 14.3         | 0.13806<br>9 | 71 |
|                  | Degree of integrated water resources management implementation (SDG 6.5.1.)              | %                                               | 15           | 0.01162<br>8 | 3  |
|                  | Proportion of hydrological basins showing high surface water extent changes (SDG 6.6.1.) | %                                               | 50           | 0.5          | 3  |
|                  | Tap water price per GDP per capita                                                       | USD/10 <sup>3</sup> m <sup>3</sup> /(USD/inhab) | 0.83584<br>9 | 0.57207<br>6 | 72 |
|                  | Final point                                                                              | -                                               | -            | 0.38282      |    |
| <b>Lithuania</b> | Water use efficiency (SDG 6.4.1.)                                                        | USD/m <sup>3</sup>                              | 163.693<br>5 | 0.73224<br>2 | 1  |
|                  | Water stress (SDG 6.4.2.)                                                                | %                                               | 1.83410<br>2 | 0.78541<br>8 | 1  |
|                  | Total population with access to safe drinking water (SDG 6.1.1.)                         | %                                               | 96.6         | 0.93333<br>3 | 1  |
|                  | Drinking water quality (SDG 6.1.1.)                                                      | %                                               | 57.4         | 0.574        | 2  |
|                  | Proportion of safely treated domestic wastewater flows (SDG 6.3.1.)                      | %                                               | 93.3528<br>1 | 0.93314<br>6 | 3  |
|                  | Degree of integrated water resources management implementation (SDG 6.5.1.)              | %                                               | 61           | 0.54651<br>2 | 3  |
|                  | Proportion of hydrological basins showing high surface water extent changes (SDG 6.6.1.) | %                                               | 0            | 1            | 3  |
|                  | Tap water price per GDP per capita                                                       | USD/10 <sup>3</sup> m <sup>3</sup> /(USD/inhab) | 0.03129<br>2 | 0.02141<br>7 | 73 |

|                   |                                                                                          |                                                 |              |              |    |
|-------------------|------------------------------------------------------------------------------------------|-------------------------------------------------|--------------|--------------|----|
|                   | Final point                                                                              | -                                               | -            | 0.69075<br>8 |    |
| <b>Luxembourg</b> | Water use efficiency (SDG 6.4.1.)                                                        | USD/m <sup>3</sup>                              | 1189.97<br>7 | 1            | 1  |
|                   | Water stress (SDG 6.4.2.)                                                                | %                                               | 3.96351<br>6 | 0.70629<br>7 | 1  |
|                   | Total population with access to safe drinking water (SDG 6.1.1.)                         | %                                               | 100          | 1            | 1  |
|                   | Drinking water quality (SDG 6.1.1.)                                                      | %                                               | 97.9         | 0.979        | 2  |
|                   | Proportion of safely treated domestic wastewater flows (SDG 6.3.1.)                      | %                                               | 96.3482<br>5 | 0.96327<br>2 | 3  |
|                   | Degree of integrated water resources management implementation (SDG 6.5.1.)              | %                                               | 89           | 0.87209<br>3 | 3  |
|                   | Proportion of hydrological basins showing high surface water extent changes (SDG 6.6.1.) | %                                               | 0            | 1            | 3  |
|                   | Tap water price per GDP per capita                                                       | USD/10 <sup>3</sup> m <sup>3</sup> /(USD/inhab) | 0.02116<br>4 | 0.01448<br>5 | 74 |
|                   | Final point                                                                              | -                                               | -            | 0.81689<br>3 |    |
| <b>Madagascar</b> | Water use efficiency (SDG 6.4.1.)                                                        | USD/m <sup>3</sup>                              | 0.72120<br>3 | 1.04E-<br>16 | 1  |
|                   | Water stress (SDG 6.4.2.)                                                                | %                                               | 11.2615<br>1 | 0.59907<br>6 | 1  |
|                   | Total population with access to safe drinking water (SDG 6.1.1.)                         | %                                               | 51.5         | 0.04902      | 1  |
|                   | Drinking water quality (SDG 6.1.1.)                                                      | %                                               | 6.2          | 0.062        | 2  |
|                   | Proportion of safely treated domestic wastewater flows (SDG 6.3.1.)                      | %                                               | 9.30359      | 0.08781<br>7 | 3  |
|                   | Degree of integrated water resources management implementation (SDG 6.5.1.)              | %                                               | 38           | 0.27907      | 3  |
|                   | Proportion of hydrological basins showing high surface water extent changes (SDG 6.6.1.) | %                                               | 8            | 0.92         | 3  |
|                   | Tap water price per GDP per capita                                                       | USD/10 <sup>3</sup> m <sup>3</sup> /(USD/inhab) | 0.68119      | 0.46622<br>4 | 75 |
|                   | Final point                                                                              | -                                               | -            | 0.30790<br>1 |    |
| <b>Malawi</b>     | Water use efficiency (SDG 6.4.1.)                                                        | USD/m <sup>3</sup>                              | 5.60028<br>8 | 0.27666<br>1 | 1  |
|                   | Water stress (SDG 6.4.2.)                                                                | %                                               | 17.5048<br>4 | 0.55378<br>7 | 1  |
|                   | Total population with access to safe drinking water (SDG 6.1.1.)                         | %                                               | 90.2         | 0.80784<br>3 | 1  |
|                   | Drinking water quality (SDG 6.1.1.)                                                      | %                                               | 12.1         | 0.121        | 2  |
|                   | Proportion of safely treated domestic wastewater flows (SDG 6.3.1.)                      | %                                               | 6.47575      | 0.05937<br>6 | 3  |
|                   | Degree of integrated water resources management implementation (SDG 6.5.1.)              | %                                               | 55           | 0.47674<br>4 | 3  |
|                   | Proportion of hydrological basins showing high surface water extent changes (SDG 6.6.1.) | %                                               | 15           | 0.85         | 3  |
|                   | Tap water price per GDP per capita                                                       | USD/10 <sup>3</sup> m <sup>3</sup> /(USD/inhab) | 1.13845      | 0.77918      | 44 |

|                                                                                          |                                                 |          |          |    |
|------------------------------------------------------------------------------------------|-------------------------------------------------|----------|----------|----|
|                                                                                          | b)                                              | 6        | 8        |    |
| Final point                                                                              | -                                               | -        | 0.490575 |    |
| <b>Malaysia</b>                                                                          |                                                 |          |          |    |
| Water use efficiency (SDG 6.4.1.)                                                        | USD/m <sup>3</sup>                              | 57.33906 | 0.590646 | 1  |
| Water stress (SDG 6.4.2.)                                                                | %                                               | 3.439487 | 0.720858 | 1  |
| Total population with access to safe drinking water (SDG 6.1.1.)                         | %                                               | 98.2     | 0.964706 | 1  |
| Drinking water quality (SDG 6.1.1.)                                                      | %                                               | 48.2     | 0.482    | 2  |
| Proportion of safely treated domestic wastewater flows (SDG 6.3.1.)                      | %                                               | 87.8246  | 0.877545 | 3  |
| Degree of integrated water resources management implementation (SDG 6.5.1.)              | %                                               | 63       | 0.569767 | 3  |
| Proportion of hydrological basins showing high surface water extent changes (SDG 6.6.1.) | %                                               | 15       | 0.85     | 3  |
| Tap water price per GDP per capita                                                       | USD/10 <sup>3</sup> m <sup>3</sup> /(USD/inhab) | 0.02115  | 0.014476 | 10 |
| Final point                                                                              | -                                               | -        | 0.63375  |    |
| <b>Malta</b>                                                                             |                                                 |          |          |    |
| Water use efficiency (SDG 6.4.1.)                                                        | USD/m <sup>3</sup>                              | 185.854  | 0.74938  | 1  |
| Water stress (SDG 6.4.2.)                                                                | %                                               | 81.85994 | 0.395404 | 1  |
| Total population with access to safe drinking water (SDG 6.1.1.)                         | %                                               | 100      | 1        | 1  |
| Drinking water quality (SDG 6.1.1.)                                                      | %                                               | 100      | 1        | 2  |
| Proportion of safely treated domestic wastewater flows (SDG 6.3.1.)                      | %                                               | 15.35631 | 0.148693 | 3  |
| Degree of integrated water resources management implementation (SDG 6.5.1.)              | %                                               | 86       | 0.837209 | 3  |
| Proportion of hydrological basins showing high surface water extent changes (SDG 6.6.1.) | %                                               | 100      | 0        | 3  |
| Tap water price per GDP per capita                                                       | USD/10 <sup>3</sup> m <sup>3</sup> /(USD/inhab) | 0.045602 | 0.031211 | 76 |
| Final point                                                                              | -                                               | -        | 0.520237 |    |
| <b>Mauritania</b>                                                                        |                                                 |          |          |    |
| Water use efficiency (SDG 6.4.1.)                                                        | USD/m <sup>3</sup>                              | 3.905759 | 0.228019 | 1  |
| Water stress (SDG 6.4.2.)                                                                | %                                               | 13.24622 | 0.582409 | 1  |
| Total population with access to safe drinking water (SDG 6.1.1.)                         | %                                               | 57.9     | 0.17451  | 1  |
| Drinking water quality (SDG 6.1.1.)                                                      | %                                               | 13.6     | 0.136    | 2  |
| Proportion of safely treated domestic wastewater flows (SDG 6.3.1.)                      | %                                               | 12.3     | 0.117954 | 77 |
| Degree of integrated water resources management implementation (SDG 6.5.1.)              | %                                               | 47       | 0.383721 | 3  |
| Proportion of hydrological basins showing high surface water extent changes (SDG 6.6.1.) | %                                               | 10       | 0.9      | 3  |
| Tap water price per GDP per capita                                                       | USD/10 <sup>3</sup> m <sup>3</sup> /(USD/inhab) | 0.36417  | 0.24924  | 78 |

|                 |                                                                                          |                                                 |         |         |    |
|-----------------|------------------------------------------------------------------------------------------|-------------------------------------------------|---------|---------|----|
|                 |                                                                                          | b)                                              | 3       | 9       |    |
|                 | Final point                                                                              | -                                               | -       | 0.34648 | 3  |
| <b>Mexico</b>   | Water use efficiency (SDG 6.4.1.)                                                        | USD/m <sup>3</sup>                              | 11.8985 | 0.37838 | 1  |
|                 |                                                                                          |                                                 | 2       | 2       |    |
|                 | Water stress (SDG 6.4.2.)                                                                | %                                               | 44.8170 | 0.45725 | 1  |
|                 |                                                                                          |                                                 | 2       | 9       |    |
|                 | Total population with access to safe drinking water (SDG 6.1.1.)                         | %                                               | 96.1    | 0.92352 | 1  |
|                 |                                                                                          |                                                 |         | 9       |    |
|                 | Drinking water quality (SDG 6.1.1.)                                                      | %                                               | 50      | 0.5     | 2  |
|                 | Proportion of safely treated domestic wastewater flows (SDG 6.3.1.)                      | %                                               | 60.0931 | 0.59863 | 3  |
|                 |                                                                                          |                                                 | 3       | 5       |    |
|                 | Degree of integrated water resources management implementation (SDG 6.5.1.)              | %                                               | 42      | 0.32558 | 3  |
|                 |                                                                                          |                                                 |         | 1       |    |
|                 | Proportion of hydrological basins showing high surface water extent changes (SDG 6.6.1.) | %                                               | 24      | 0.76    | 3  |
|                 | Tap water price per GDP per capita                                                       | USD/10 <sup>3</sup> m <sup>3</sup> /(USD/inhab) | 0.14533 | 0.09947 | 10 |
|                 |                                                                                          |                                                 | 5       | 1       |    |
|                 | Final point                                                                              | -                                               | -       | 0.50535 | 7  |
| <b>Moldova</b>  | Water use efficiency (SDG 6.4.1.)                                                        | USD/m <sup>3</sup>                              | 8.44651 | 0.33212 | 1  |
|                 |                                                                                          |                                                 | 1       | 9       |    |
|                 | Water stress (SDG 6.4.2.)                                                                | %                                               | 12.5631 | 0.58784 | 1  |
|                 |                                                                                          |                                                 | 1       | 6       |    |
|                 | Total population with access to safe drinking water (SDG 6.1.1.)                         | %                                               | 88.4    | 0.77254 | 1  |
|                 |                                                                                          |                                                 |         | 9       |    |
|                 | Drinking water quality (SDG 6.1.1.)                                                      | %                                               | 50.8    | 0.508   | 2  |
|                 | Proportion of safely treated domestic wastewater flows (SDG 6.3.1.)                      | %                                               | 38.4944 | 0.38140 | 3  |
|                 |                                                                                          |                                                 | 2       | 5       |    |
|                 | Degree of integrated water resources management implementation (SDG 6.5.1.)              | %                                               | 46      | 0.37209 | 3  |
|                 |                                                                                          |                                                 |         | 3       |    |
|                 | Proportion of hydrological basins showing high surface water extent changes (SDG 6.6.1.) | %                                               | 0       | 1       | 3  |
|                 | Tap water price per GDP per capita                                                       | USD/10 <sup>3</sup> m <sup>3</sup> /(USD/inhab) | 0.31657 | 0.21667 | 79 |
|                 |                                                                                          |                                                 | 2       |         |    |
|                 | Final point                                                                              | -                                               | -       | 0.52133 | 7  |
| <b>Mongolia</b> | Water use efficiency (SDG 6.4.1.)                                                        | USD/m <sup>3</sup>                              | 22.8546 | 0.46648 | 1  |
|                 |                                                                                          |                                                 | 7       | 8       |    |
|                 | Water stress (SDG 6.4.2.)                                                                | %                                               | 3.39500 | 0.72219 | 1  |
|                 |                                                                                          |                                                 | 7       | 5       |    |
|                 | Total population with access to safe drinking water (SDG 6.1.1.)                         | %                                               | 64.4    | 0.30196 | 1  |
|                 |                                                                                          |                                                 |         | 1       |    |
|                 | Drinking water quality (SDG 6.1.1.)                                                      | %                                               | 43.8    | 0.438   | 2  |
|                 | Proportion of safely treated domestic wastewater flows (SDG 6.3.1.)                      | %                                               | 10.4300 | 0.09914 | 3  |
|                 |                                                                                          |                                                 | 6       | 7       |    |
|                 | Degree of integrated water resources management implementation (SDG 6.5.1.)              | %                                               | 45      | 0.36046 | 3  |
|                 |                                                                                          |                                                 |         | 5       |    |
|                 | Proportion of hydrological basins showing high surface water extent changes (SDG 6.6.1.) | %                                               | 20      | 0.8     | 3  |



|                   |                                                                                          |                                                 |              |              |    |
|-------------------|------------------------------------------------------------------------------------------|-------------------------------------------------|--------------|--------------|----|
|                   | Tap water price per GDP per capita                                                       | USD/10 <sup>3</sup> m <sup>3</sup> /(USD/inhab) | 0.09732<br>2 | 0.06661      | 80 |
|                   | Final point                                                                              | -                                               | -            | 0.40685<br>8 |    |
| <b>Morocco</b>    | Water use efficiency (SDG 6.4.1.)                                                        | USD/m <sup>3</sup>                              | 8.70718<br>2 | 0.33623<br>2 | 1  |
|                   | Water stress (SDG 6.4.2.)                                                                | %                                               | 50.7512<br>1 | 0.44449<br>1 | 1  |
|                   | Total population with access to safe drinking water (SDG 6.1.1.)                         | %                                               | 85.4         | 0.71372<br>5 | 1  |
|                   | Drinking water quality (SDG 6.1.1.)                                                      | %                                               | 36.7         | 0.367        | 2  |
|                   | Proportion of safely treated domestic wastewater flows (SDG 6.3.1.)                      | %                                               | 36.1430<br>9 | 0.35775<br>7 | 3  |
|                   | Degree of integrated water resources management implementation (SDG 6.5.1.)              | %                                               | 71           | 0.66279<br>1 | 3  |
|                   | Proportion of hydrological basins showing high surface water extent changes (SDG 6.6.1.) | %                                               | 30           | 0.7          | 3  |
|                   | Tap water price per GDP per capita                                                       | USD/10 <sup>3</sup> m <sup>3</sup> /(USD/inhab) | 0.35390<br>5 | 0.24222<br>2 | 10 |
|                   | Final point                                                                              | -                                               | -            | 0.47802<br>7 |    |
| <b>Mozambique</b> | Water use efficiency (SDG 6.4.1.)                                                        | USD/m <sup>3</sup>                              | 7.75905<br>2 | 0.32067      | 1  |
|                   | Water stress (SDG 6.4.2.)                                                                | %                                               | 1.75148<br>6 | 0.79015      | 1  |
|                   | Total population with access to safe drinking water (SDG 6.1.1.)                         | %                                               | 51.1         | 0.04117<br>6 | 1  |
|                   | Drinking water quality (SDG 6.1.1.)                                                      | %                                               | 16.5         | 0.165        | 2  |
|                   | Proportion of safely treated domestic wastewater flows (SDG 6.3.1.)                      | %                                               | 6.7          | 0.06163<br>2 | 81 |
|                   | Degree of integrated water resources management implementation (SDG 6.5.1.)              | %                                               | 62           | 0.55814      | 3  |
|                   | Proportion of hydrological basins showing high surface water extent changes (SDG 6.6.1.) | %                                               | 24           | 0.76         | 3  |
|                   | Tap water price per GDP per capita                                                       | USD/10 <sup>3</sup> m <sup>3</sup> /(USD/inhab) | 0.19605<br>9 | 0.13418<br>8 | 82 |
|                   | Final point                                                                              | -                                               | -            | 0.35387      |    |
| <b>Namibia</b>    | Water use efficiency (SDG 6.4.1.)                                                        | USD/m <sup>3</sup>                              | 30.4943<br>5 | 0.50541<br>5 | 1  |
|                   | Water stress (SDG 6.4.2.)                                                                | %                                               | 0.86155<br>3 | 0.86299<br>8 | 1  |
|                   | Total population with access to safe drinking water (SDG 6.1.1.)                         | %                                               | 91           | 0.82352<br>9 | 1  |
|                   | Drinking water quality (SDG 6.1.1.)                                                      | %                                               | 18.9         | 0.189        | 2  |
|                   | Proportion of safely treated domestic wastewater flows (SDG 6.3.1.)                      | %                                               | 26.3         | 0.25876      | 83 |
|                   | Degree of integrated water resources management implementation (SDG 6.5.1.)              | %                                               | 53           | 0.45348<br>8 | 3  |
|                   | Proportion of hydrological basins showing high surface water extent changes (SDG 6.6.1.) | %                                               | 24           | 0.76         | 3  |

|                    |                                                                                          |                                                 |          |          |    |
|--------------------|------------------------------------------------------------------------------------------|-------------------------------------------------|----------|----------|----|
|                    | Tap water price per GDP per capita                                                       | USD/10 <sup>3</sup> m <sup>3</sup> /(USD/inhab) | 0.752046 | 0.514719 | 44 |
|                    | Final point                                                                              | -                                               | -        | 0.545989 |    |
| <b>Nepal</b>       | Water use efficiency (SDG 6.4.1.)                                                        | USD/m <sup>3</sup>                              | 2.640405 | 0.175172 | 1  |
|                    | Water stress (SDG 6.4.2.)                                                                | %                                               | 8.311833 | 0.63026  | 1  |
|                    | Total population with access to safe drinking water (SDG 6.1.1.)                         | %                                               | 91.6     | 0.835294 | 1  |
|                    | Drinking water quality (SDG 6.1.1.)                                                      | %                                               | 25.9     | 0.259    | 2  |
|                    | Proportion of safely treated domestic wastewater flows (SDG 6.3.1.)                      | %                                               | 37.20054 | 0.368392 | 3  |
|                    | Degree of integrated water resources management implementation (SDG 6.5.1.)              | %                                               | 37       | 0.267442 | 3  |
|                    | Proportion of hydrological basins showing high surface water extent changes (SDG 6.6.1.) | %                                               | 17       | 0.83     | 3  |
|                    | Tap water price per GDP per capita                                                       | USD/10 <sup>3</sup> m <sup>3</sup> /(USD/inhab) | 0.1057   | 0.072344 | 84 |
|                    | Final point                                                                              | -                                               | -        | 0.429738 |    |
| <b>Netherlands</b> | Water use efficiency (SDG 6.4.1.)                                                        | USD/m <sup>3</sup>                              | 85.97548 | 0.645324 | 1  |
|                    | Water stress (SDG 6.4.2.)                                                                | %                                               | 16.80356 | 0.557985 | 1  |
|                    | Total population with access to safe drinking water (SDG 6.1.1.)                         | %                                               | 100      | 1        | 1  |
|                    | Drinking water quality (SDG 6.1.1.)                                                      | %                                               | 100      | 1        | 2  |
|                    | Proportion of safely treated domestic wastewater flows (SDG 6.3.1.)                      | %                                               | 99.81056 | 0.998095 | 3  |
|                    | Degree of integrated water resources management implementation (SDG 6.5.1.)              | %                                               | 92       | 0.906977 | 3  |
|                    | Proportion of hydrological basins showing high surface water extent changes (SDG 6.6.1.) | %                                               | 0        | 1        | 3  |
|                    | Tap water price per GDP per capita                                                       | USD/10 <sup>3</sup> m <sup>3</sup> /(USD/inhab) | 0.07875  | 0.053898 | 10 |
|                    | Final point                                                                              | -                                               | -        | 0.770285 |    |
| <b>New Zealand</b> | Water use efficiency (SDG 6.4.1.)                                                        | USD/m <sup>3</sup>                              | 38.68756 | 0.537537 | 1  |
|                    | Water stress (SDG 6.4.2.)                                                                | %                                               | 8.048085 | 0.633571 | 1  |
|                    | Total population with access to safe drinking water (SDG 6.1.1.)                         | %                                               | 100      | 1        | 1  |
|                    | Drinking water quality (SDG 6.1.1.)                                                      | %                                               | 74.5     | 0.745    | 2  |
|                    | Proportion of safely treated domestic wastewater flows (SDG 6.3.1.)                      | %                                               | 85.14296 | 0.850575 | 3  |
|                    | Degree of integrated water resources management implementation (SDG 6.5.1.)              | %                                               | 65       | 0.593023 | 3  |
|                    | Proportion of hydrological basins showing high surface water extent                      | %                                               | 5        | 0.95     | 3  |

|                        |                                                                                          |                                                 |          |          |    |
|------------------------|------------------------------------------------------------------------------------------|-------------------------------------------------|----------|----------|----|
|                        | changes (SDG 6.6.1.)                                                                     |                                                 |          |          |    |
|                        | Tap water price per GDP per capita                                                       | USD/10 <sup>3</sup> m <sup>3</sup> /(USD/inhab) | 0.030929 | 0.021168 | 10 |
|                        | Final point                                                                              | -                                               | -        | 0.666359 |    |
| <b>Niger</b>           | Water use efficiency (SDG 6.4.1.)                                                        | USD/m <sup>3</sup>                              | 2.759023 | 0.181104 | 1  |
|                        | Water stress (SDG 6.4.2.)                                                                | %                                               | 11.02094 | 0.601293 | 1  |
|                        | Total population with access to safe drinking water (SDG 6.1.1.)                         | %                                               | 58.2     | 0.180392 | 1  |
|                        | Drinking water quality (SDG 6.1.1.)                                                      | %                                               | 1.7      | 0.017    | 2  |
|                        | Proportion of safely treated domestic wastewater flows (SDG 6.3.1.)                      | %                                               | 4.00021  | 0.034479 | 3  |
|                        | Degree of integrated water resources management implementation (SDG 6.5.1.)              | %                                               | 53       | 0.453488 | 3  |
|                        | Proportion of hydrological basins showing high surface water extent changes (SDG 6.6.1.) | %                                               | 7        | 0.93     | 3  |
|                        | Tap water price per GDP per capita                                                       | USD/10 <sup>3</sup> m <sup>3</sup> /(USD/inhab) | 1.22078  | 0.835533 |    |
|                        | Final point                                                                              | -                                               | -        | 0.404161 |    |
| <b>Nigeria</b>         | Water use efficiency (SDG 6.4.1.)                                                        | USD/m <sup>3</sup>                              | 30.12267 | 0.503759 | 1  |
|                        | Water stress (SDG 6.4.2.)                                                                | %                                               | 9.668217 | 0.614739 | 1  |
|                        | Total population with access to safe drinking water (SDG 6.1.1.)                         | %                                               | 68.5     | 0.382353 | 1  |
|                        | Drinking water quality (SDG 6.1.1.)                                                      | %                                               | 4.3      | 0.043    | 2  |
|                        | Proportion of safely treated domestic wastewater flows (SDG 6.3.1.)                      | %                                               | 48.2916  | 0.479941 | 3  |
|                        | Degree of integrated water resources management implementation (SDG 6.5.1.)              | %                                               | 44       | 0.348837 | 3  |
|                        | Proportion of hydrological basins showing high surface water extent changes (SDG 6.6.1.) | %                                               | 38       | 0.62     | 3  |
|                        | Tap water price per GDP per capita                                                       | USD/10 <sup>3</sup> m <sup>3</sup> /(USD/inhab) | 0.354835 | 0.242858 | 10 |
|                        | Final point                                                                              | -                                               | -        | 0.404436 |    |
| <b>North Macedonia</b> | Water use efficiency (SDG 6.4.1.)                                                        | USD/m <sup>3</sup>                              | 17.55577 | 0.430884 | 1  |
|                        | Water stress (SDG 6.4.2.)                                                                | %                                               | 38.70232 | 0.47232  | 1  |
|                        | Total population with access to safe drinking water (SDG 6.1.1.)                         | %                                               | 99.4     | 0.988235 | 1  |
|                        | Drinking water quality (SDG 6.1.1.)                                                      | %                                               | 58.3     | 0.583    | 2  |
|                        | Proportion of safely treated domestic wastewater flows (SDG 6.3.1.)                      | %                                               | 9.12154  | 0.085987 | 3  |
|                        | Degree of integrated water resources management implementation (SDG 6.5.1.)              | %                                               | 33       | 0.22093  | 3  |
|                        | Proportion of hydrological basins                                                        | %                                               | 0        | 1        | 3  |

|                 |                                                                                          |                                                 |          |          |    |
|-----------------|------------------------------------------------------------------------------------------|-------------------------------------------------|----------|----------|----|
|                 | showing high surface water extent changes (SDG 6.6.1.)                                   |                                                 |          |          |    |
|                 | Tap water price per GDP per capita                                                       | USD/10 <sup>3</sup> m <sup>3</sup> /(USD/inhab) | 0.073049 | 0.049997 | 85 |
|                 | Final point                                                                              | -                                               | -        | 0.478919 |    |
| <b>Norway</b>   | Water use efficiency (SDG 6.4.1.)                                                        | USD/m <sup>3</sup>                              | 129.5813 | 0.700699 | 1  |
|                 | Water stress (SDG 6.4.2.)                                                                | %                                               | 2.046464 | 0.774169 | 1  |
|                 | Total population with access to safe drinking water (SDG 6.1.1.)                         | %                                               | 100      | 1        | 1  |
|                 | Drinking water quality (SDG 6.1.1.)                                                      | %                                               | 100      | 1        | 2  |
|                 | Proportion of safely treated domestic wastewater flows (SDG 6.3.1.)                      | %                                               | 75.65636 | 0.755163 | 3  |
|                 | Degree of integrated water resources management implementation (SDG 6.5.1.)              | %                                               | 68       | 0.627907 | 3  |
|                 | Proportion of hydrological basins showing high surface water extent changes (SDG 6.6.1.) | %                                               | 41       | 0.59     | 3  |
|                 | Tap water price per GDP per capita                                                       | USD/10 <sup>3</sup> m <sup>3</sup> /(USD/inhab) | 0.090623 | 0.062024 | 10 |
|                 | Final point                                                                              | -                                               | -        | 0.688745 |    |
| <b>Pakistan</b> | Water use efficiency (SDG 6.4.1.)                                                        | USD/m <sup>3</sup>                              | 1.539766 | 0.102377 | 1  |
|                 | Water stress (SDG 6.4.2.)                                                                | %                                               | 116.3057 | 0.359342 | 1  |
|                 | Total population with access to safe drinking water (SDG 6.1.1.)                         | %                                               | 91.4     | 0.831373 | 1  |
|                 | Drinking water quality (SDG 6.1.1.)                                                      | %                                               | 15.3     | 0.153    | 2  |
|                 | Proportion of safely treated domestic wastewater flows (SDG 6.3.1.)                      | %                                               | 27.9     | 0.274852 | 86 |
|                 | Degree of integrated water resources management implementation (SDG 6.5.1.)              | %                                               | 56       | 0.488372 | 3  |
|                 | Proportion of hydrological basins showing high surface water extent changes (SDG 6.6.1.) | %                                               | 33       | 0.67     | 3  |
|                 | Tap water price per GDP per capita                                                       | USD/10 <sup>3</sup> m <sup>3</sup> /(USD/inhab) | 0.075393 | 0.051601 | 10 |
|                 | Final point                                                                              | -                                               | -        | 0.366365 |    |
| <b>Panama</b>   | Water use efficiency (SDG 6.4.1.)                                                        | USD/m <sup>3</sup>                              | 41.12094 | 0.54577  | 1  |
|                 | Water stress (SDG 6.4.2.)                                                                | %                                               | 0.901071 | 0.858393 | 1  |
|                 | Total population with access to safe drinking water (SDG 6.1.1.)                         | %                                               | 94.7     | 0.896078 | 1  |
|                 | Drinking water quality (SDG 6.1.1.)                                                      | %                                               | 41.7     | 0.417    | 2  |
|                 | Proportion of safely treated domestic wastewater flows (SDG 6.3.1.)                      | %                                               | 21.5     | 0.210483 | 87 |
|                 | Degree of integrated water resources management implementation (SDG 6.5.1.)              | %                                               | 33       | 0.22093  | 3  |

|                    |                                                                                          |                                                 |          |          |    |
|--------------------|------------------------------------------------------------------------------------------|-------------------------------------------------|----------|----------|----|
|                    | Proportion of hydrological basins showing high surface water extent changes (SDG 6.6.1.) | %                                               | 62       | 0.38     | 3  |
|                    | Tap water price per GDP per capita                                                       | USD/10 <sup>3</sup> m <sup>3</sup> /(USD/inhab) | 0.046458 | 0.031797 | 10 |
|                    | Final point                                                                              | -                                               | -        | 0.445057 |    |
| <b>Peru</b>        | Water use efficiency (SDG 6.4.1.)                                                        | USD/m <sup>3</sup>                              | 4.423579 | 0.244824 | 1  |
|                    | Water stress (SDG 6.4.2.)                                                                | %                                               | 7.181446 | 0.645269 | 1  |
|                    | Total population with access to safe drinking water (SDG 6.1.1.)                         | %                                               | 86.7     | 0.739216 | 1  |
|                    | Drinking water quality (SDG 6.1.1.)                                                      | %                                               | 42.8     | 0.428    | 2  |
|                    | Proportion of safely treated domestic wastewater flows (SDG 6.3.1.)                      | %                                               | 28.3     | 0.278875 | 88 |
|                    | Degree of integrated water resources management implementation (SDG 6.5.1.)              | %                                               | 41       | 0.313953 | 3  |
|                    | Proportion of hydrological basins showing high surface water extent changes (SDG 6.6.1.) | %                                               | 9        | 0.91     | 3  |
|                    | Tap water price per GDP per capita                                                       | USD/10 <sup>3</sup> m <sup>3</sup> /(USD/inhab) | 0.139549 | 0.095511 | 10 |
|                    | Final point                                                                              | -                                               | -        | 0.456956 |    |
| <b>Philippines</b> | Water use efficiency (SDG 6.4.1.)                                                        | USD/m <sup>3</sup>                              | 3.895399 | 0.227661 | 1  |
|                    | Water stress (SDG 6.4.2.)                                                                | %                                               | 26.25104 | 0.512179 | 1  |
|                    | Total population with access to safe drinking water (SDG 6.1.1.)                         | %                                               | 91.8     | 0.839216 | 1  |
|                    | Drinking water quality (SDG 6.1.1.)                                                      | %                                               | 34.4     | 0.344    | 2  |
|                    | Proportion of safely treated domestic wastewater flows (SDG 6.3.1.)                      | %                                               | 42.94676 | 0.426185 | 3  |
|                    | Degree of integrated water resources management implementation (SDG 6.5.1.)              | %                                               | 56       | 0.488372 | 3  |
|                    | Proportion of hydrological basins showing high surface water extent changes (SDG 6.6.1.) | %                                               | 9        | 0.91     | 3  |
|                    | Tap water price per GDP per capita                                                       | USD/10 <sup>3</sup> m <sup>3</sup> /(USD/inhab) | 0.124286 | 0.085065 | 10 |
|                    | Final point                                                                              | -                                               | -        | 0.479085 |    |
| <b>Poland</b>      | Water use efficiency (SDG 6.4.1.)                                                        | USD/m <sup>3</sup>                              | 51.60076 | 0.576413 | 1  |
|                    | Water stress (SDG 6.4.2.)                                                                | %                                               | 30       | 0.498472 | 1  |
|                    | Total population with access to safe drinking water (SDG 6.1.1.)                         | %                                               | 98.3     | 0.966667 | 1  |
|                    | Drinking water quality (SDG 6.1.1.)                                                      | %                                               | 65.7     | 0.657    | 2  |
|                    | Proportion of safely treated domestic wastewater flows (SDG 6.3.1.)                      | %                                               | 81.85183 | 0.817474 | 3  |
|                    | Degree of integrated water resources management implementation (SDG 6.5.1.)              | %                                               | 74       | 0.697674 | 3  |

|                 |                                                                                          |                                                 |          |          |    |
|-----------------|------------------------------------------------------------------------------------------|-------------------------------------------------|----------|----------|----|
|                 | 6.5.1.)                                                                                  |                                                 |          |          |    |
|                 | Proportion of hydrological basins showing high surface water extent changes (SDG 6.6.1.) | %                                               | 4        | 0.96     | 3  |
|                 | Tap water price per GDP per capita                                                       | USD/10 <sup>3</sup> m <sup>3</sup> /(USD/inhab) | 0.098959 | 0.06773  | 10 |
|                 | Final point                                                                              | -                                               | -        | 0.655179 |    |
| <b>Portugal</b> | Water use efficiency (SDG 6.4.1.)                                                        | USD/m <sup>3</sup>                              | 28.48891 | 0.496232 | 1  |
|                 | Water stress (SDG 6.4.2.)                                                                | %                                               | 12.31571 | 0.589888 | 1  |
|                 | Total population with access to safe drinking water (SDG 6.1.1.)                         | %                                               | 100      | 1        | 1  |
|                 | Drinking water quality (SDG 6.1.1.)                                                      | %                                               | 85.7     | 0.857    | 2  |
|                 | Proportion of safely treated domestic wastewater flows (SDG 6.3.1.)                      | %                                               | 73.58287 | 0.734309 | 3  |
|                 | Degree of integrated water resources management implementation (SDG 6.5.1.)              | %                                               | 72       | 0.674419 | 3  |
|                 | Proportion of hydrological basins showing high surface water extent changes (SDG 6.6.1.) | %                                               | 8        | 0.92     | 3  |
|                 | Tap water price per GDP per capita                                                       | USD/10 <sup>3</sup> m <sup>3</sup> /(USD/inhab) | 0.081649 | 0.055883 | 10 |
|                 | Final point                                                                              | -                                               | -        | 0.665966 |    |
| <b>Qatar</b>    | Water use efficiency (SDG 6.4.1.)                                                        | USD/m <sup>3</sup>                              | 192.4198 | 0.754066 | 1  |
|                 | Water stress (SDG 6.4.2.)                                                                | %                                               | 431.0345 | 0.224839 | 1  |
|                 | Total population with access to safe drinking water (SDG 6.1.1.)                         | %                                               | 100      | 1        | 1  |
|                 | Drinking water quality (SDG 6.1.1.)                                                      | %                                               | 57       | 0.57     | 2  |
|                 | Proportion of safely treated domestic wastewater flows (SDG 6.3.1.)                      | %                                               | 99.54709 | 0.995445 | 3  |
|                 | Degree of integrated water resources management implementation (SDG 6.5.1.)              | %                                               | 81       | 0.77907  | 3  |
|                 | Proportion of hydrological basins showing high surface water extent changes (SDG 6.6.1.) | %                                               | 67       | 0.33     | 3  |
|                 | Tap water price per GDP per capita                                                       | USD/10 <sup>3</sup> m <sup>3</sup> /(USD/inhab) | 0.039398 | 0.026965 | 10 |
|                 | Final point                                                                              | -                                               | -        | 0.585048 |    |
| <b>Romania</b>  | Water use efficiency (SDG 6.4.1.)                                                        | USD/m <sup>3</sup>                              | 28.46818 | 0.496134 | 1  |
|                 | Water stress (SDG 6.4.2.)                                                                | %                                               | 6.006928 | 0.663606 | 1  |
|                 | Total population with access to safe drinking water (SDG 6.1.1.)                         | %                                               | 100      | 1        | 1  |
|                 | Drinking water quality (SDG 6.1.1.)                                                      | %                                               | 55.4     | 0.554    | 2  |
|                 | Proportion of safely treated domestic wastewater flows (SDG 6.3.1.)                      | %                                               | 48.32247 | 0.480251 | 3  |
|                 | Degree of integrated water resources                                                     | %                                               | 77       | 0.73255  | 3  |

|                     |                                                                                          |                                                 |          |          |    |
|---------------------|------------------------------------------------------------------------------------------|-------------------------------------------------|----------|----------|----|
|                     | management implementation (SDG 6.5.1.)                                                   |                                                 |          | 8        |    |
|                     | Proportion of hydrological basins showing high surface water extent changes (SDG 6.6.1.) | %                                               | 17       | 0.83     | 3  |
|                     | Tap water price per GDP per capita                                                       | USD/10 <sup>3</sup> m <sup>3</sup> /(USD/inhab) | 0.085856 | 0.058762 | 89 |
|                     | Final point                                                                              | -                                               | -        | 0.601914 |    |
| <b>Russia</b>       | Water use efficiency (SDG 6.4.1.)                                                        | USD/m <sup>3</sup>                              | 18.91209 | 0.440929 | 1  |
|                     | Water stress (SDG 6.4.2.)                                                                | %                                               | 4.122243 | 0.702266 | 1  |
|                     | Total population with access to safe drinking water (SDG 6.1.1.)                         | %                                               | 96.9     | 0.939216 | 1  |
|                     | Drinking water quality (SDG 6.1.1.)                                                      | %                                               | 55.8     | 0.558    | 2  |
|                     | Proportion of safely treated domestic wastewater flows (SDG 6.3.1.)                      | %                                               | 12.92399 | 0.12423  | 3  |
|                     | Degree of integrated water resources management implementation (SDG 6.5.1.)              | %                                               | 88       | 0.860465 | 3  |
|                     | Proportion of hydrological basins showing high surface water extent changes (SDG 6.6.1.) | %                                               | 22       | 0.78     | 3  |
|                     | Tap water price per GDP per capita                                                       | USD/10 <sup>3</sup> m <sup>3</sup> /(USD/inhab) | 0.077911 | 0.053324 | 10 |
|                     | Final point                                                                              | -                                               | -        | 0.557304 |    |
| <b>Saudi Arabia</b> | Water use efficiency (SDG 6.4.1.)                                                        | USD/m <sup>3</sup>                              | 25.07587 | 0.479008 | 1  |
|                     | Water stress (SDG 6.4.2.)                                                                | %                                               | 974.1667 | 0.141117 | 1  |
|                     | Total population with access to safe drinking water (SDG 6.1.1.)                         | %                                               | 97       | 0.941176 | 1  |
|                     | Drinking water quality (SDG 6.1.1.)                                                      | %                                               | 51       | 0.51     | 2  |
|                     | Proportion of safely treated domestic wastewater flows (SDG 6.3.1.)                      | %                                               | 79.63548 | 0.795183 | 3  |
|                     | Degree of integrated water resources management implementation (SDG 6.5.1.)              | %                                               | 57       | 0.5      | 3  |
|                     | Proportion of hydrological basins showing high surface water extent changes (SDG 6.6.1.) | %                                               | 14       | 0.86     | 3  |
|                     | Tap water price per GDP per capita                                                       | USD/10 <sup>3</sup> m <sup>3</sup> /(USD/inhab) | 0.001641 | 0.001123 | 10 |
|                     | Final point                                                                              | -                                               | -        | 0.528451 |    |
| <b>Senegal</b>      | Water use efficiency (SDG 6.4.1.)                                                        | USD/m <sup>3</sup>                              | 5.718748 | 0.279487 | 1  |
|                     | Water stress (SDG 6.4.2.)                                                                | %                                               | 16.27645 | 0.561257 | 1  |
|                     | Total population with access to safe drinking water (SDG 6.1.1.)                         | %                                               | 78.5     | 0.578431 | 1  |
|                     | Drinking water quality (SDG 6.1.1.)                                                      | %                                               | 13       | 0.13     | 2  |
|                     | Proportion of safely treated domestic wastewater flows (SDG 6.3.1.)                      | %                                               | 14.16667 | 0.136728 | 3  |

|                     |                                                                                          |                                                 |          |          |    |
|---------------------|------------------------------------------------------------------------------------------|-------------------------------------------------|----------|----------|----|
|                     | Degree of integrated water resources management implementation (SDG 6.5.1.)              | %                                               | 50       | 0.418605 | 3  |
|                     | Proportion of hydrological basins showing high surface water extent changes (SDG 6.6.1.) | %                                               | 26       | 0.74     | 3  |
|                     | Tap water price per GDP per capita                                                       | USD/10 <sup>3</sup> m <sup>3</sup> /(USD/inhab) | 0.528124 | 0.361461 | 10 |
|                     | Final point                                                                              | -                                               | -        | 0.400746 |    |
| <b>Serbia</b>       | Water use efficiency (SDG 6.4.1.)                                                        | USD/m <sup>3</sup>                              | 6.534429 | 0.297484 | 1  |
|                     | Water stress (SDG 6.4.2.)                                                                | %                                               | 6.000789 | 0.663711 | 1  |
|                     | Total population with access to safe drinking water (SDG 6.1.1.)                         | %                                               | 99.2     | 0.984314 | 1  |
|                     | Drinking water quality (SDG 6.1.1.)                                                      | %                                               | 60.5     | 0.605    | 2  |
|                     | Proportion of safely treated domestic wastewater flows (SDG 6.3.1.)                      | %                                               | 27.05284 | 0.266331 | 3  |
|                     | Degree of integrated water resources management implementation (SDG 6.5.1.)              | %                                               | 36       | 0.255814 | 3  |
|                     | Proportion of hydrological basins showing high surface water extent changes (SDG 6.6.1.) | %                                               | 21       | 0.79     | 3  |
|                     | Tap water price per GDP per capita                                                       | USD/10 <sup>3</sup> m <sup>3</sup> /(USD/inhab) | 0.100579 | 0.068839 | 90 |
|                     | Final point                                                                              | -                                               | -        | 0.491437 |    |
| <b>Sierra Leone</b> | Water use efficiency (SDG 6.4.1.)                                                        | USD/m <sup>3</sup>                              | 8.41088  | 0.331559 | 1  |
|                     | Water stress (SDG 6.4.2.)                                                                | %                                               | 0.495794 | 0.919735 | 1  |
|                     | Total population with access to safe drinking water (SDG 6.1.1.)                         | %                                               | 62.6     | 0.266667 | 1  |
|                     | Drinking water quality (SDG 6.1.1.)                                                      | %                                               | 11.6     | 0.116    | 2  |
|                     | Proportion of safely treated domestic wastewater flows (SDG 6.3.1.)                      | %                                               | 8.392    | 0.078649 | 3  |
|                     | Degree of integrated water resources management implementation (SDG 6.5.1.)              | %                                               | 36       | 0.255814 | 3  |
|                     | Proportion of hydrological basins showing high surface water extent changes (SDG 6.6.1.) | %                                               | 22       | 0.78     | 3  |
|                     | Tap water price per GDP per capita                                                       | USD/10 <sup>3</sup> m <sup>3</sup> /(USD/inhab) | 0.463458 | 0.317203 | 91 |
|                     | Final point                                                                              | -                                               | -        | 0.383203 |    |
| <b>Singapore</b>    | Water use efficiency (SDG 6.4.1.)                                                        | USD/m <sup>3</sup>                              | 476.27   | 0.876399 | 1  |
|                     | Water stress (SDG 6.4.2.)                                                                | %                                               | 83.11667 | 0.39384  | 1  |
|                     | Total population with access to safe drinking water (SDG 6.1.1.)                         | %                                               | 100      | 1        | 1  |
|                     | Drinking water quality (SDG 6.1.1.)                                                      | %                                               | 88.9     | 0.889    | 2  |
|                     | Proportion of safely treated domestic                                                    | %                                               | 100      | 1        | 3  |



|                     |                                                                                          |                                                 |          |          |    |
|---------------------|------------------------------------------------------------------------------------------|-------------------------------------------------|----------|----------|----|
|                     | wastewater flows (SDG 6.3.1.)                                                            |                                                 |          |          |    |
|                     | Degree of integrated water resources management implementation (SDG 6.5.1.)              | %                                               | 100      | 1        | 3  |
|                     | Proportion of hydrological basins showing high surface water extent changes (SDG 6.6.1.) | %                                               | 0        | 1        | 3  |
|                     | Tap water price per GDP per capita                                                       | USD/10 <sup>3</sup> m <sup>3</sup> /(USD/inhab) | 0.030457 | 0.020846 | 10 |
|                     | Final point                                                                              | -                                               | -        | 0.77251  |    |
| <b>Slovakia</b>     | Water use efficiency (SDG 6.4.1.)                                                        | USD/m <sup>3</sup>                              | 149.873  | 0.720336 | 1  |
|                     | Water stress (SDG 6.4.2.)                                                                | %                                               | 2.388124 | 0.758316 | 1  |
|                     | Total population with access to safe drinking water (SDG 6.1.1.)                         | %                                               | 100      | 1        | 1  |
|                     | Drinking water quality (SDG 6.1.1.)                                                      | %                                               | 64.6     | 0.646    | 2  |
|                     | Proportion of safely treated domestic wastewater flows (SDG 6.3.1.)                      | %                                               | 79.78519 | 0.796689 | 3  |
|                     | Degree of integrated water resources management implementation (SDG 6.5.1.)              | %                                               | 61       | 0.546512 | 3  |
|                     | Proportion of hydrological basins showing high surface water extent changes (SDG 6.6.1.) | %                                               | 0        | 1        | 3  |
|                     | Tap water price per GDP per capita                                                       | USD/10 <sup>3</sup> m <sup>3</sup> /(USD/inhab) | 0.059958 | 0.041036 | 92 |
|                     | Final point                                                                              | -                                               | -        | 0.688611 |    |
| <b>Slovenia</b>     | Water use efficiency (SDG 6.4.1.)                                                        | USD/m <sup>3</sup>                              | 41.38625 | 0.546638 | 1  |
|                     | Water stress (SDG 6.4.2.)                                                                | %                                               | 6.781609 | 0.651151 | 1  |
|                     | Total population with access to safe drinking water (SDG 6.1.1.)                         | %                                               | 99.5     | 0.990196 | 1  |
|                     | Drinking water quality (SDG 6.1.1.)                                                      | %                                               | 70.3     | 0.703    | 2  |
|                     | Proportion of safely treated domestic wastewater flows (SDG 6.3.1.)                      | %                                               | 67.20513 | 0.670164 | 3  |
|                     | Degree of integrated water resources management implementation (SDG 6.5.1.)              | %                                               | 87       | 0.848837 | 3  |
|                     | Proportion of hydrological basins showing high surface water extent changes (SDG 6.6.1.) | %                                               | 18       | 0.82     | 3  |
|                     | Tap water price per GDP per capita                                                       | USD/10 <sup>3</sup> m <sup>3</sup> /(USD/inhab) | 0.041897 | 0.028675 | 93 |
|                     | Final point                                                                              | -                                               | -        | 0.657333 |    |
| <b>South Africa</b> | Water use efficiency (SDG 6.4.1.)                                                        | USD/m <sup>3</sup>                              | 13.77323 | 0.398131 | 1  |
|                     | Water stress (SDG 6.4.2.)                                                                | %                                               | 65.03362 | 0.41903  | 1  |
|                     | Total population with access to safe drinking water (SDG 6.1.1.)                         | %                                               | 93.2     | 0.866667 | 1  |
|                     | Drinking water quality (SDG 6.1.1.)                                                      | %                                               | 23.4     | 0.234    | 2  |

|                    |                                                                                          |                                                 |              |              |    |
|--------------------|------------------------------------------------------------------------------------------|-------------------------------------------------|--------------|--------------|----|
|                    | Proportion of safely treated domestic wastewater flows (SDG 6.3.1.)                      | %                                               | 61.2913<br>8 | 0.61068<br>7 | 3  |
|                    | Degree of integrated water resources management implementation (SDG 6.5.1.)              | %                                               | 71           | 0.66279<br>1 | 3  |
|                    | Proportion of hydrological basins showing high surface water extent changes (SDG 6.6.1.) | %                                               | 26           | 0.74         | 3  |
|                    | Tap water price per GDP per capita                                                       | USD/10 <sup>3</sup> m <sup>3</sup> /(USD/inhab) | 0.30229<br>4 | 0.20689<br>7 | 10 |
|                    | Final point                                                                              | -                                               | -            | 0.51727<br>5 |    |
| <b>South Korea</b> | Water use efficiency (SDG 6.4.1.)                                                        | USD/m <sup>3</sup>                              | 54.4090<br>2 | 0.58356<br>6 | 1  |
|                    | Water stress (SDG 6.4.2.)                                                                | %                                               | 85.2218<br>3 | 0.39127<br>1 | 1  |
|                    | Total population with access to safe drinking water (SDG 6.1.1.)                         | %                                               | 97.6         | 0.95294<br>1 | 1  |
|                    | Drinking water quality (SDG 6.1.1.)                                                      | %                                               | 84.6         | 0.846        | 2  |
|                    | Proportion of safely treated domestic wastewater flows (SDG 6.3.1.)                      | %                                               | 99.5250<br>9 | 0.99522<br>4 | 3  |
|                    | Degree of integrated water resources management implementation (SDG 6.5.1.)              | %                                               | 76           | 0.72093      | 3  |
|                    | Proportion of hydrological basins showing high surface water extent changes (SDG 6.6.1.) | %                                               | 6            | 0.94         | 3  |
|                    | Tap water price per GDP per capita                                                       | USD/10 <sup>3</sup> m <sup>3</sup> /(USD/inhab) | 0.02651<br>3 | 0.01814<br>6 | 10 |
|                    | Final point                                                                              | -                                               | -            | 0.68101      |    |
| <b>Spain</b>       | Water use efficiency (SDG 6.4.1.)                                                        | USD/m <sup>3</sup>                              | 36.2308<br>6 | 0.52868<br>1 | 1  |
|                    | Water stress (SDG 6.4.2.)                                                                | %                                               | 43.2540<br>4 | 0.46090<br>4 | 1  |
|                    | Total population with access to safe drinking water (SDG 6.1.1.)                         | %                                               | 100          | 1            | 1  |
|                    | Drinking water quality (SDG 6.1.1.)                                                      | %                                               | 94.8         | 0.948        | 2  |
|                    | Proportion of safely treated domestic wastewater flows (SDG 6.3.1.)                      | %                                               | 86.0158<br>2 | 0.85935<br>4 | 3  |
|                    | Degree of integrated water resources management implementation (SDG 6.5.1.)              | %                                               | 87           | 0.84883<br>7 | 3  |
|                    | Proportion of hydrological basins showing high surface water extent changes (SDG 6.6.1.) | %                                               | 19           | 0.81         | 3  |
|                    | Tap water price per GDP per capita                                                       | USD/10 <sup>3</sup> m <sup>3</sup> /(USD/inhab) | 0.07504<br>9 | 0.05136<br>6 | 10 |
|                    | Final point                                                                              | -                                               | -            | 0.68839<br>3 |    |
| <b>Suriname</b>    | Water use efficiency (SDG 6.4.1.)                                                        | USD/m <sup>3</sup>                              | 6.92486      | 0.30531<br>8 | 1  |
|                    | Water stress (SDG 6.4.2.)                                                                | %                                               | 3.95060<br>9 | 0.70663<br>2 | 1  |
|                    | Total population with access to safe drinking water (SDG 6.1.1.)                         | %                                               | 94.8         | 0.89803<br>9 | 1  |
|                    | Drinking water quality (SDG 6.1.1.)                                                      | %                                               | 35.4         | 0.354        | 2  |

|                    |                                                                                          |                                                 |              |              |    |
|--------------------|------------------------------------------------------------------------------------------|-------------------------------------------------|--------------|--------------|----|
|                    | Proportion of safely treated domestic wastewater flows (SDG 6.3.1.)                      | %                                               | 23.8176<br>2 | 0.23379<br>3 | 3  |
|                    | Degree of integrated water resources management implementation (SDG 6.5.1.)              | %                                               | 23           | 0.10465<br>1 | 3  |
|                    | Proportion of hydrological basins showing high surface water extent changes (SDG 6.6.1.) | %                                               | 12           | 0.88         | 3  |
|                    | Tap water price per GDP per capita                                                       | USD/10 <sup>3</sup> m <sup>3</sup> /(USD/inhab) | 0.05325<br>5 | 0.03644<br>9 | 94 |
|                    | Final point                                                                              | -                                               | -            | 0.43986      |    |
| <b>Sweden</b>      | Water use efficiency (SDG 6.4.1.)                                                        | USD/m <sup>3</sup>                              | 187.925<br>4 | 0.75087<br>6 | 1  |
|                    | Water stress (SDG 6.4.2.)                                                                | %                                               | 3.58297<br>3 | 0.71666<br>2 | 1  |
|                    | Total population with access to safe drinking water (SDG 6.1.1.)                         | %                                               | 100          | 1            | 1  |
|                    | Drinking water quality (SDG 6.1.1.)                                                      | %                                               | 97.8         | 0.978        | 2  |
|                    | Proportion of safely treated domestic wastewater flows (SDG 6.3.1.)                      | %                                               | 95.2005      | 0.95172<br>9 | 3  |
|                    | Degree of integrated water resources management implementation (SDG 6.5.1.)              | %                                               | 86           | 0.83720<br>9 | 3  |
|                    | Proportion of hydrological basins showing high surface water extent changes (SDG 6.6.1.) | %                                               | 19           | 0.81         | 3  |
|                    | Tap water price per GDP per capita                                                       | USD/10 <sup>3</sup> m <sup>3</sup> /(USD/inhab) | 0.07391<br>6 | 0.05059      | 10 |
|                    | Final point                                                                              | -                                               | -            | 0.76188<br>3 |    |
| <b>Switzerland</b> | Water use efficiency (SDG 6.4.1.)                                                        | USD/m <sup>3</sup>                              | 404.817<br>6 | 0.85445<br>8 | 1  |
|                    | Water stress (SDG 6.4.2.)                                                                | %                                               | 6.49885<br>6 | 0.65552<br>4 | 1  |
|                    | Total population with access to safe drinking water (SDG 6.1.1.)                         | %                                               | 100          | 1            | 1  |
|                    | Drinking water quality (SDG 6.1.1.)                                                      | %                                               | 100          | 1            | 2  |
|                    | Proportion of safely treated domestic wastewater flows (SDG 6.3.1.)                      | %                                               | 99.2043<br>6 | 0.99199<br>8 | 3  |
|                    | Degree of integrated water resources management implementation (SDG 6.5.1.)              | %                                               | 81           | 0.77907      | 3  |
|                    | Proportion of hydrological basins showing high surface water extent changes (SDG 6.6.1.) | %                                               | 0            | 1            | 3  |
|                    | Tap water price per GDP per capita                                                       | USD/10 <sup>3</sup> m <sup>3</sup> /(USD/inhab) | 0.03543<br>5 | 0.02425<br>3 | 10 |
|                    | Final point                                                                              | -                                               | -            | 0.78816<br>3 |    |
| <b>Tajikistan</b>  | Water use efficiency (SDG 6.4.1.)                                                        | USD/m <sup>3</sup>                              | 1.01921<br>4 | 0.04668<br>5 | 1  |
|                    | Water stress (SDG 6.4.2.)                                                                | %                                               | 69.9432<br>6 | 0.41155<br>8 | 1  |
|                    | Total population with access to safe drinking water (SDG 6.1.1.)                         | %                                               | 73.8         | 0.48627<br>5 | 1  |
|                    | Drinking water quality (SDG 6.1.1.)                                                      | %                                               | 31.7         | 0.317        | 2  |

|                    |                                                                                          |                                                 |              |              |               |
|--------------------|------------------------------------------------------------------------------------------|-------------------------------------------------|--------------|--------------|---------------|
|                    | Proportion of safely treated domestic wastewater flows (SDG 6.3.1.)                      | %                                               | 13.3         | 0.12801<br>2 | <sup>95</sup> |
|                    | Degree of integrated water resources management implementation (SDG 6.5.1.)              | %                                               | 46           | 0.37209<br>3 | <sup>3</sup>  |
|                    | Proportion of hydrological basins showing high surface water extent changes (SDG 6.6.1.) | %                                               | 6            | 0.94         | <sup>3</sup>  |
|                    | Tap water price per GDP per capita                                                       | USD/10 <sup>3</sup> m <sup>3</sup> /(USD/inhab) | 0.07871<br>7 | 0.05387<br>6 | <sup>96</sup> |
|                    | Final point                                                                              | -                                               | -            | 0.34443<br>7 |               |
| <b>Thailand</b>    | Water use efficiency (SDG 6.4.1.)                                                        | USD/m <sup>3</sup>                              | 7.27310<br>7 | 0.31194      | <sup>1</sup>  |
|                    | Water stress (SDG 6.4.2.)                                                                | %                                               | 23.0139<br>4 | 0.52569<br>2 | <sup>1</sup>  |
|                    | Total population with access to safe drinking water (SDG 6.1.1.)                         | %                                               | 97.8         | 0.95686<br>3 | <sup>1</sup>  |
|                    | Drinking water quality (SDG 6.1.1.)                                                      | %                                               | 42.7         | 0.427        | <sup>2</sup>  |
|                    | Proportion of safely treated domestic wastewater flows (SDG 6.3.1.)                      | %                                               | 24.4022<br>9 | 0.23967<br>3 | <sup>3</sup>  |
|                    | Degree of integrated water resources management implementation (SDG 6.5.1.)              | %                                               | 53           | 0.45348<br>8 | <sup>3</sup>  |
|                    | Proportion of hydrological basins showing high surface water extent changes (SDG 6.6.1.) | %                                               | 11           | 0.89         | <sup>3</sup>  |
|                    | Tap water price per GDP per capita                                                       | USD/10 <sup>3</sup> m <sup>3</sup> /(USD/inhab) | 0.08568<br>6 | 0.05864<br>6 | <sup>97</sup> |
|                    | Final point                                                                              | -                                               | -            | 0.48291<br>3 |               |
| <b>Timor-Leste</b> | Water use efficiency (SDG 6.4.1.)                                                        | USD/m <sup>3</sup>                              | 1.53046<br>1 | 0.10155<br>9 | <sup>1</sup>  |
|                    | Water stress (SDG 6.4.2.)                                                                | %                                               | 28.2682<br>1 | 0.50457<br>8 | <sup>1</sup>  |
|                    | Total population with access to safe drinking water (SDG 6.1.1.)                         | %                                               | 71.9         | 0.44902      | <sup>1</sup>  |
|                    | Drinking water quality (SDG 6.1.1.)                                                      | %                                               | 26.2         | 0.262        | <sup>2</sup>  |
|                    | Proportion of safely treated domestic wastewater flows (SDG 6.3.1.)                      | %                                               | 12.7         | 0.12197<br>7 | <sup>98</sup> |
|                    | Degree of integrated water resources management implementation (SDG 6.5.1.)              | %                                               | 14           | 0            | <sup>3</sup>  |
|                    | Proportion of hydrological basins showing high surface water extent changes (SDG 6.6.1.) | %                                               | 50           | 0.5          | <sup>3</sup>  |
|                    | Tap water price per GDP per capita                                                       | USD/10 <sup>3</sup> m <sup>3</sup> /(USD/inhab) | 0.35072<br>5 | 0.24004<br>5 | <sup>99</sup> |
|                    | Final point                                                                              | -                                               | -            | 0.27239<br>7 |               |
| <b>Togo</b>        | Water use efficiency (SDG 6.4.1.)                                                        | USD/m <sup>3</sup>                              | 21.3756<br>1 | 0.45745<br>8 | <sup>1</sup>  |
|                    | Water stress (SDG 6.4.2.)                                                                | %                                               | 3.39163<br>5 | 0.72229<br>7 | <sup>1</sup>  |
|                    | Total population with access to safe drinking water (SDG 6.1.1.)                         | %                                               | 63.1         | 0.27647<br>1 | <sup>1</sup>  |

|                     |                                                                                          |                                                 |          |          |     |
|---------------------|------------------------------------------------------------------------------------------|-------------------------------------------------|----------|----------|-----|
|                     | Drinking water quality (SDG 6.1.1.)                                                      | %                                               | 4.9      | 0.049    | 2   |
|                     | Proportion of safely treated domestic wastewater flows (SDG 6.3.1.)                      | %                                               | 15.0379  | 0.145491 | 3   |
|                     | Degree of integrated water resources management implementation (SDG 6.5.1.)              | %                                               | 34       | 0.232558 | 3   |
|                     | Proportion of hydrological basins showing high surface water extent changes (SDG 6.6.1.) | %                                               | 22       | 0.78     | 3   |
|                     | Tap water price per GDP per capita                                                       | USD/10 <sup>3</sup> m <sup>3</sup> /(USD/inhab) | 0.713669 | 0.488453 | 44  |
|                     | Final point                                                                              | -                                               | -        | 0.393966 |     |
| <b>Tunisia</b>      | Water use efficiency (SDG 6.4.1.)                                                        | USD/m <sup>3</sup>                              | 10.01886 | 0.355173 | 1   |
|                     | Water stress (SDG 6.4.2.)                                                                | %                                               | 98.1134  | 0.376808 | 1   |
|                     | Total population with access to safe drinking water (SDG 6.1.1.)                         | %                                               | 97.7     | 0.954902 | 1   |
|                     | Drinking water quality (SDG 6.1.1.)                                                      | %                                               | 49.1     | 0.491    | 2   |
|                     | Proportion of safely treated domestic wastewater flows (SDG 6.3.1.)                      | %                                               | 59.72575 | 0.59494  | 3   |
|                     | Degree of integrated water resources management implementation (SDG 6.5.1.)              | %                                               | 60       | 0.534884 | 3   |
|                     | Proportion of hydrological basins showing high surface water extent changes (SDG 6.6.1.) | %                                               | 21       | 0.79     | 3   |
|                     | Tap water price per GDP per capita                                                       | USD/10 <sup>3</sup> m <sup>3</sup> /(USD/inhab) | 0.185635 | 0.127054 | 100 |
|                     | Final point                                                                              | -                                               | -        | 0.528095 |     |
| <b>Türkiye</b>      | Water use efficiency (SDG 6.4.1.)                                                        | USD/m <sup>3</sup>                              | 13.75347 | 0.397937 | 1   |
|                     | Water stress (SDG 6.4.2.)                                                                | %                                               | 45.7057  | 0.455243 | 1   |
|                     | Total population with access to safe drinking water (SDG 6.1.1.)                         | %                                               | 100      | 1        | 1   |
|                     | Drinking water quality (SDG 6.1.1.)                                                      | %                                               | 47       | 0.47     | 2   |
|                     | Proportion of safely treated domestic wastewater flows (SDG 6.3.1.)                      | %                                               | 63.32585 | 0.631148 | 3   |
|                     | Degree of integrated water resources management implementation (SDG 6.5.1.)              | %                                               | 72       | 0.674419 | 3   |
|                     | Proportion of hydrological basins showing high surface water extent changes (SDG 6.6.1.) | %                                               | 40       | 0.6      | 3   |
|                     | Tap water price per GDP per capita                                                       | USD/10 <sup>3</sup> m <sup>3</sup> /(USD/inhab) | 0.109509 | 0.074951 | 10  |
|                     | Final point                                                                              | -                                               | -        | 0.537962 |     |
| <b>Turkmenistan</b> | Water use efficiency (SDG 6.4.1.)                                                        | USD/m <sup>3</sup>                              | 1.17144  | 0.065474 | 1   |
|                     | Water stress (SDG 6.4.2.)                                                                | %                                               | 135.2138 | 0.343876 | 1   |
|                     | Total population with access to safe                                                     | %                                               | 60.4     | 0.22352  | 1   |

|                |                                                                                          |                                                 |          |          |     |
|----------------|------------------------------------------------------------------------------------------|-------------------------------------------------|----------|----------|-----|
|                | drinking water (SDG 6.1.1.)                                                              |                                                 |          | 9        |     |
|                | Drinking water quality (SDG 6.1.1.)                                                      | %                                               | 47.7     | 0.477    | 2   |
|                | Proportion of safely treated domestic wastewater flows (SDG 6.3.1.)                      | %                                               | 14.8     | 0.143098 | 101 |
|                | Degree of integrated water resources management implementation (SDG 6.5.1.)              | %                                               | 64       | 0.581395 | 3   |
|                | Proportion of hydrological basins showing high surface water extent changes (SDG 6.6.1.) | %                                               | 25       | 0.75     | 3   |
|                | Tap water price per GDP per capita                                                       | USD/10 <sup>3</sup> m <sup>3</sup> /(USD/inhab) | 0        | 0        | 102 |
|                | Final point                                                                              | -                                               | -        | 0.323047 |     |
| <b>Ukraine</b> | Water use efficiency (SDG 6.4.1.)                                                        | USD/m <sup>3</sup>                              | 7.617022 | 0.318177 | 1   |
|                | Water stress (SDG 6.4.2.)                                                                | %                                               | 12.25577 | 0.590389 | 1   |
|                | Total population with access to safe drinking water (SDG 6.1.1.)                         | %                                               | 96.2     | 0.92549  | 1   |
|                | Drinking water quality (SDG 6.1.1.)                                                      | %                                               | 55.1     | 0.551    | 2   |
|                | Proportion of safely treated domestic wastewater flows (SDG 6.3.1.)                      | %                                               | 34.28519 | 0.339071 | 3   |
|                | Degree of integrated water resources management implementation (SDG 6.5.1.)              | %                                               | 39       | 0.290698 | 3   |
|                | Proportion of hydrological basins showing high surface water extent changes (SDG 6.6.1.) | %                                               | 1        | 0.99     | 3   |
|                | Tap water price per GDP per capita                                                       | USD/10 <sup>3</sup> m <sup>3</sup> /(USD/inhab) | 0.083486 | 0.05714  | 10  |
|                | Final point                                                                              | -                                               | -        | 0.507746 |     |
| <b>U.A.E.</b>  | Water use efficiency (SDG 6.4.1.)                                                        | USD/m <sup>3</sup>                              | 74.45145 | 0.625898 | 1   |
|                | Water stress (SDG 6.4.2.)                                                                | %                                               | 1587.333 | 0.090987 | 1   |
|                | Total population with access to safe drinking water (SDG 6.1.1.)                         | %                                               | 99.6     | 0.992157 | 1   |
|                | Drinking water quality (SDG 6.1.1.)                                                      | %                                               | 51.7     | 0.517    | 2   |
|                | Proportion of safely treated domestic wastewater flows (SDG 6.3.1.)                      | %                                               | 95.90876 | 0.958852 | 3   |
|                | Degree of integrated water resources management implementation (SDG 6.5.1.)              | %                                               | 79       | 0.755814 | 3   |
|                | Proportion of hydrological basins showing high surface water extent changes (SDG 6.6.1.) | %                                               | 29       | 0.71     | 3   |
|                | Tap water price per GDP per capita                                                       | USD/10 <sup>3</sup> m <sup>3</sup> /(USD/inhab) | 0.094586 | 0.064737 | 10  |
|                | Final point                                                                              | -                                               | -        | 0.589431 |     |
| <b>U.K.</b>    | Water use efficiency (SDG 6.4.1.)                                                        | USD/m <sup>3</sup>                              | 307.6167 | 0.817395 | 1   |
|                | Water stress (SDG 6.4.2.)                                                                | %                                               | 14.35465 | 0.574158 | 1   |

|                   |                                                                                          |                                                 |              |              |     |
|-------------------|------------------------------------------------------------------------------------------|-------------------------------------------------|--------------|--------------|-----|
|                   | Total population with access to safe drinking water (SDG 6.1.1.)                         | %                                               | 100          | 1            | 1   |
|                   | Drinking water quality (SDG 6.1.1.)                                                      | %                                               | 100          | 1            | 2   |
|                   | Proportion of safely treated domestic wastewater flows (SDG 6.3.1.)                      | %                                               | 98.8016<br>8 | 0.98794<br>8 | 3   |
|                   | Degree of integrated water resources management implementation (SDG 6.5.1.)              | %                                               | 79           | 0.75581<br>4 | 3   |
|                   | Proportion of hydrological basins showing high surface water extent changes (SDG 6.6.1.) | %                                               | 65           | 0.35         | 3   |
|                   | Tap water price per GDP per capita                                                       | USD/10 <sup>3</sup> m <sup>3</sup> /(USD/inhab) | 0.07888<br>4 | 0.05399      | 10  |
|                   | Final point                                                                              | -                                               | -            | 0.69241<br>3 |     |
| <b>U.S.A.</b>     | Water use efficiency (SDG 6.4.1.)                                                        | USD/m <sup>3</sup>                              | 43.0341<br>5 | 0.55190<br>9 | 1   |
|                   | Water stress (SDG 6.4.2.)                                                                | %                                               | 28.1619<br>8 | 0.50496<br>4 | 1   |
|                   | Total population with access to safe drinking water (SDG 6.1.1.)                         | %                                               | 99.2         | 0.98431<br>4 | 1   |
|                   | Drinking water quality (SDG 6.1.1.)                                                      | %                                               | 89.3         | 0.893        | 2   |
|                   | Proportion of safely treated domestic wastewater flows (SDG 6.3.1.)                      | %                                               | 91.0647<br>6 | 0.91013<br>3 | 3   |
|                   | Degree of integrated water resources management implementation (SDG 6.5.1.)              | %                                               | 77           | 0.73255<br>8 | 3   |
|                   | Proportion of hydrological basins showing high surface water extent changes (SDG 6.6.1.) | %                                               | 11           | 0.89         | 3   |
|                   | Tap water price per GDP per capita                                                       | USD/10 <sup>3</sup> m <sup>3</sup> /(USD/inhab) | 0.04130<br>1 | 0.02826<br>7 | 10  |
|                   | Final point                                                                              | -                                               | -            | 0.68689<br>3 |     |
| <b>Uzbekistan</b> | Water use efficiency (SDG 6.4.1.)                                                        | USD/m <sup>3</sup>                              | 1.60451      | 0.10793<br>7 | 1   |
|                   | Water stress (SDG 6.4.2.)                                                                | %                                               | 168.924<br>6 | 0.32102      | 1   |
|                   | Total population with access to safe drinking water (SDG 6.1.1.)                         | %                                               | 87.3         | 0.75098      | 1   |
|                   | Drinking water quality (SDG 6.1.1.)                                                      | %                                               | 54           | 0.54         | 2   |
|                   | Proportion of safely treated domestic wastewater flows (SDG 6.3.1.)                      | %                                               | 32.266       | 0.31876<br>3 | 3   |
|                   | Degree of integrated water resources management implementation (SDG 6.5.1.)              | %                                               | 48           | 0.39534<br>9 | 3   |
|                   | Proportion of hydrological basins showing high surface water extent changes (SDG 6.6.1.) | %                                               | 26           | 0.74         | 3   |
|                   | Tap water price per GDP per capita                                                       | USD/10 <sup>3</sup> m <sup>3</sup> /(USD/inhab) | 0.07017<br>8 | 0.04803<br>2 | 103 |
|                   | Final point                                                                              | -                                               | -            | 0.40276      |     |
| <b>Zambia</b>     | Water use efficiency (SDG 6.4.1.)                                                        | USD/m <sup>3</sup>                              | 13.7524<br>1 | 0.39792<br>7 | 1   |
|                   | Water stress (SDG 6.4.2.)                                                                | %                                               | 2.83549<br>8 | 0.74068<br>5 | 1   |

|                 |                                                                                          |                                                 |          |          |     |
|-----------------|------------------------------------------------------------------------------------------|-------------------------------------------------|----------|----------|-----|
|                 | Total population with access to safe drinking water (SDG 6.1.1.)                         | %                                               | 65.4     | 0.321569 | 1   |
|                 | Drinking water quality (SDG 6.1.1.)                                                      | %                                               | 13.2     | 0.132    | 2   |
|                 | Proportion of safely treated domestic wastewater flows (SDG 6.3.1.)                      | %                                               | 14.2     | 0.137063 | 104 |
|                 | Degree of integrated water resources management implementation (SDG 6.5.1.)              | %                                               | 58       | 0.511628 | 3   |
|                 | Proportion of hydrological basins showing high surface water extent changes (SDG 6.6.1.) | %                                               | 20       | 0.8      | 3   |
|                 | Tap water price per GDP per capita                                                       | USD/10 <sup>3</sup> m <sup>3</sup> /(USD/inhab) | 0.301482 | 0.206342 | 105 |
|                 | Final point                                                                              | -                                               | -        | 0.405902 |     |
| <b>Zimbabwe</b> | Water use efficiency (SDG 6.4.1.)                                                        | USD/m <sup>3</sup>                              | 4.469993 | 0.246233 | 1   |
|                 | Water stress (SDG 6.4.2.)                                                                | %                                               | 35.40539 | 0.481462 | 1   |
|                 | Total population with access to safe drinking water (SDG 6.1.1.)                         | %                                               | 76.9     | 0.547059 | 1   |
|                 | Drinking water quality (SDG 6.1.1.)                                                      | %                                               | 16.2     | 0.162    | 2   |
|                 | Proportion of safely treated domestic wastewater flows (SDG 6.3.1.)                      | %                                               | 22.9922  | 0.225491 | 3   |
|                 | Degree of integrated water resources management implementation (SDG 6.5.1.)              | %                                               | 63       | 0.569767 | 3   |
|                 | Proportion of hydrological basins showing high surface water extent changes (SDG 6.6.1.) | %                                               | 12       | 0.88     | 3   |
|                 | Tap water price per GDP per capita                                                       | USD/10 <sup>3</sup> m <sup>3</sup> /(USD/inhab) | 0.532798 | 0.364661 |     |
|                 | Final point                                                                              | -                                               | -        | 0.434584 |     |



Table S3. WCEI for 136 studied countries in alphabetical order (7 indicators).

| Country        | Parameters                                                                               | Unit                                            | Value        | Points       | Ref |
|----------------|------------------------------------------------------------------------------------------|-------------------------------------------------|--------------|--------------|-----|
| <b>Albania</b> | Water use efficiency (SDG 6.4.1.)                                                        | USD/m <sup>3</sup>                              | 12.0974<br>5 | 0.38062      | 1   |
|                | Water stress (SDG 6.4.2.)                                                                | %                                               | 4.72355<br>8 | 0.68828<br>5 | 1   |
|                | Total population with access to safe drinking water (SDG 6.1.1.)                         | %                                               | 95.1         | 0.90392<br>2 | 1   |
|                | Proportion of safely treated domestic wastewater flows (SDG 6.3.1.)                      | %                                               | 13.3542<br>2 | 0.12855<br>7 | 3   |
|                | Degree of integrated water resources management implementation (SDG 6.5.1.)              | %                                               | 47           | 0.38372<br>1 | 3   |
|                | Proportion of hydrological basins showing high surface water extent changes (SDG 6.6.1.) | %                                               | 11           | 0.89         | 3   |
|                | Tap water price per GDP per capita                                                       | USD/10 <sup>3</sup> m <sup>3</sup> /(USD/inhab) | 0.12353      | 0.08454<br>7 | 4   |
|                | Final point                                                                              | -                                               | -            | 0.49423<br>6 |     |
| <b>Algeria</b> | Water use efficiency (SDG 6.4.1.)                                                        | USD/m <sup>3</sup>                              | 13.8130<br>3 | 0.39852      | 1   |
|                | Water stress (SDG 6.4.2.)                                                                | %                                               | 137.920<br>4 | 0.34184<br>1 | 1   |
|                | Total population with access to safe drinking water (SDG 6.1.1.)                         | %                                               | 83.6         | 0.67843<br>1 | 1   |
|                | Proportion of safely treated domestic wastewater flows (SDG 6.3.1.)                      | %                                               | 76.1669<br>9 | 0.76029<br>9 | 3   |
|                | Degree of integrated water resources management implementation (SDG 6.5.1.)              | %                                               | 54           | 0.46511<br>6 | 3   |
|                | Proportion of hydrological basins showing high surface water extent changes (SDG 6.6.1.) | %                                               | 11           | 0.89         | 3   |
|                | Tap water price per GDP per capita                                                       | USD/10 <sup>3</sup> m <sup>3</sup> /(USD/inhab) | 0.05938<br>3 | 0.04064<br>3 | 5   |
|                | Final point                                                                              | -                                               | -            | 0.51069<br>3 |     |
| <b>Angola</b>  | Water use efficiency (SDG 6.4.1.)                                                        | USD/m <sup>3</sup>                              | 129          | 0.70009<br>2 | 1   |
|                | Water stress (SDG 6.4.2.)                                                                | %                                               | 1.87188<br>3 | 0.78332<br>4 | 1   |
|                | Total population with access to safe drinking water (SDG 6.1.1.)                         | %                                               | 49           | 0            | 1   |
|                | Proportion of safely treated domestic wastewater flows (SDG 6.3.1.)                      | %                                               | 29.2         | 0.28792<br>6 | 6   |
|                | Degree of integrated water resources management implementation (SDG 6.5.1.)              | %                                               | 61           | 0.54651<br>2 | 3   |
|                | Proportion of hydrological basins showing high surface water extent changes (SDG 6.6.1.) | %                                               | 43           | 0.57         | 3   |
|                | Tap water price per GDP per capita                                                       | USD/10 <sup>3</sup> m <sup>3</sup> /(USD/inhab) | 0.44836<br>6 | 0.30687<br>3 | 7   |
|                | Final point                                                                              | -                                               | -            | 0.45639      |     |

|                            |                                                                                          |                                                  |              |              |    |
|----------------------------|------------------------------------------------------------------------------------------|--------------------------------------------------|--------------|--------------|----|
| <b>Antigua and Barbuda</b> | Water use efficiency (SDG 6.4.1.)                                                        | USD/m <sup>3</sup>                               | 98.0836<br>3 | 0.66310<br>9 | 1  |
|                            | Water stress (SDG 6.4.2.)                                                                | %                                                | 8.46153<br>8 | 0.62842<br>7 | 1  |
|                            | Total population with access to safe drinking water (SDG 6.1.1.)                         | %                                                | 97.9         | 0.95882<br>4 | 1  |
|                            | Proportion of safely treated domestic wastewater flows (SDG 6.3.1.)                      | %                                                | 24.3         | 0.23864<br>4 | 8  |
|                            | Degree of integrated water resources management implementation (SDG 6.5.1.)              | %                                                | 35           | 0.24418<br>6 | 3  |
|                            | Proportion of hydrological basins showing high surface water extent changes (SDG 6.6.1.) | %                                                | 0            | 1            | 3  |
|                            | Tap water price per GDP per capita                                                       | USD/10 <sup>3</sup> m <sup>3</sup> /(USD/inh ab) | 0.08575<br>5 | 0.05869<br>3 | 9  |
|                            | Final point                                                                              | -                                                | -            | 0.54169<br>8 |    |
| <b>Argentina</b>           | Water use efficiency (SDG 6.4.1.)                                                        | USD/m <sup>3</sup>                               | 11.4124<br>7 | 0.37275<br>2 | 1  |
|                            | Water stress (SDG 6.4.2.)                                                                | %                                                | 10.4566<br>6 | 0.60669      | 1  |
|                            | Total population with access to safe drinking water (SDG 6.1.1.)                         | %                                                | 99.1         | 0.98235<br>3 | 1  |
|                            | Proportion of safely treated domestic wastewater flows (SDG 6.3.1.)                      | %                                                | 36.4838<br>8 | 0.36118<br>4 | 3  |
|                            | Degree of integrated water resources management implementation (SDG 6.5.1.)              | %                                                | 38           | 0.27907      | 3  |
|                            | Proportion of hydrological basins showing high surface water extent changes (SDG 6.6.1.) | %                                                | 29           | 0.71         | 3  |
|                            | Tap water price per GDP per capita                                                       | USD/10 <sup>3</sup> m <sup>3</sup> /(USD/inh ab) | 0.12152<br>3 | 0.08317<br>4 | 10 |
|                            | Final point                                                                              | -                                                | -            | 0.48503<br>2 |    |
| <b>Armenia</b>             | Water use efficiency (SDG 6.4.1.)                                                        | USD/m <sup>3</sup>                               | 3.50153<br>8 | 0.21327<br>3 | 1  |
|                            | Water stress (SDG 6.4.2.)                                                                | %                                                | 57.0909<br>8 | 0.43240<br>5 | 1  |
|                            | Total population with access to safe drinking water (SDG 6.1.1.)                         | %                                                | 100          | 1            | 1  |
|                            | Proportion of safely treated domestic wastewater flows (SDG 6.3.1.)                      | %                                                | 40.0830<br>8 | 0.39738<br>3 | 3  |
|                            | Degree of integrated water resources management implementation (SDG 6.5.1.)              | %                                                | 52           | 0.44186      | 3  |
|                            | Proportion of hydrological basins showing high surface water extent changes (SDG 6.6.1.) | %                                                | 33           | 0.67         | 3  |
|                            | Tap water price per GDP per capita                                                       | USD/10 <sup>3</sup> m <sup>3</sup> /(USD/inh ab) | 0.08438<br>8 | 0.05775<br>7 | 11 |
|                            | Final point                                                                              | -                                                | -            | 0.45895<br>4 |    |
| <b>Australia</b>           | Water use efficiency (SDG 6.4.1.)                                                        | USD/m <sup>3</sup>                               | 90.2608<br>2 | 0.65188<br>9 | 1  |
|                            | Water stress (SDG 6.4.2.)                                                                | %                                                | 3.47406      | 0.71983      | 1  |

|                   |                                                                                          |                                                 |          |          |    |
|-------------------|------------------------------------------------------------------------------------------|-------------------------------------------------|----------|----------|----|
|                   |                                                                                          |                                                 | 5        | 1        |    |
|                   | Total population with access to safe drinking water (SDG 6.1.1.)                         | %                                               | 100      | 1        | 1  |
|                   | Proportion of safely treated domestic wastewater flows (SDG 6.3.1.)                      | %                                               | 76.1718  | 0.760347 | 3  |
|                   | Degree of integrated water resources management implementation (SDG 6.5.1.)              | %                                               | 88       | 0.860465 | 3  |
|                   | Proportion of hydrological basins showing high surface water extent changes (SDG 6.6.1.) | %                                               | 21       | 0.79     | 3  |
|                   | Tap water price per GDP per capita                                                       | USD/10 <sup>3</sup> m <sup>3</sup> /(USD/inhab) | 0.068431 | 0.046836 | 10 |
|                   | Final point                                                                              | -                                               | -        | 0.68991  |    |
| <b>Austria</b>    | Water use efficiency (SDG 6.4.1.)                                                        | USD/m <sup>3</sup>                              | 98.08646 | 0.663112 | 1  |
|                   | Water stress (SDG 6.4.2.)                                                                | %                                               | 9.643548 | 0.615001 | 1  |
|                   | Total population with access to safe drinking water (SDG 6.1.1.)                         | %                                               | 100      | 1        | 1  |
|                   | Proportion of safely treated domestic wastewater flows (SDG 6.3.1.)                      | %                                               | 98.59576 | 0.985877 | 3  |
|                   | Degree of integrated water resources management implementation (SDG 6.5.1.)              | %                                               | 91       | 0.895349 | 3  |
|                   | Proportion of hydrological basins showing high surface water extent changes (SDG 6.6.1.) | %                                               | 10       | 0.9      | 3  |
|                   | Tap water price per GDP per capita                                                       | USD/10 <sup>3</sup> m <sup>3</sup> /(USD/inhab) | 0.063818 | 0.043679 | 10 |
|                   | Final point                                                                              | -                                               | -        | 0.729003 |    |
| <b>Azerbaijan</b> | Water use efficiency (SDG 6.4.1.)                                                        | USD/m <sup>3</sup>                              | 3.630141 | 0.218141 | 1  |
|                   | Water stress (SDG 6.4.2.)                                                                | %                                               | 55.59726 | 0.435127 | 1  |
|                   | Total population with access to safe drinking water (SDG 6.1.1.)                         | %                                               | 87       | 0.745098 | 1  |
|                   | Proportion of safely treated domestic wastewater flows (SDG 6.3.1.)                      | %                                               | 57.39653 | 0.571514 | 3  |
|                   | Degree of integrated water resources management implementation (SDG 6.5.1.)              | %                                               | 57       | 0.5      | 3  |
|                   | Proportion of hydrological basins showing high surface water extent changes (SDG 6.6.1.) | %                                               | 18       | 0.82     | 3  |
|                   | Tap water price per GDP per capita                                                       | USD/10 <sup>3</sup> m <sup>3</sup> /(USD/inhab) | 0.099947 | 0.068406 | 12 |
|                   | Final point                                                                              | -                                               | -        | 0.479755 |    |
| <b>Bahrain</b>    | Water use efficiency (SDG 6.4.1.)                                                        | USD/m <sup>3</sup>                              | 74.72671 | 0.626396 | 1  |
|                   | Water stress (SDG 6.4.2.)                                                                | %                                               | 133.7069 | 0.345026 | 1  |
|                   | Total population with access to safe drinking water (SDG 6.1.1.)                         | %                                               | 100      | 1        | 1  |

|                   |                                                                                          |                                                     |              |              |    |
|-------------------|------------------------------------------------------------------------------------------|-----------------------------------------------------|--------------|--------------|----|
|                   | Proportion of safely treated domestic wastewater flows (SDG 6.3.1.)                      | %                                                   | 95.6290<br>8 | 0.95603<br>9 | 3  |
|                   | Degree of integrated water resources management implementation (SDG 6.5.1.)              | %                                                   | 39           | 0.29069<br>8 | 3  |
|                   | Proportion of hydrological basins showing high surface water extent changes (SDG 6.6.1.) | %                                                   | 100          | 0            | 3  |
|                   | Tap water price per GDP per capita                                                       | USD/10 <sup>3</sup> m <sup>3</sup> /(USD/inh<br>ab) | 0.01154<br>3 | 0.00790<br>1 | 13 |
|                   | Final point                                                                              | -                                                   | -            | 0.46086<br>6 |    |
| <b>Bangladesh</b> | Water use efficiency (SDG 6.4.1.)                                                        | USD/m <sup>3</sup>                                  | 7.09347<br>4 | 0.30856<br>5 | 1  |
|                   | Water stress (SDG 6.4.2.)                                                                | %                                                   | 5.72333<br>9 | 0.66857<br>2 | 1  |
|                   | Total population with access to safe drinking water (SDG 6.1.1.)                         | %                                                   | 86.9         | 0.74313<br>7 | 1  |
|                   | Proportion of safely treated domestic wastewater flows (SDG 6.3.1.)                      | %                                                   | 16.0110<br>9 | 0.15527<br>8 | 3  |
|                   | Degree of integrated water resources management implementation (SDG 6.5.1.)              | %                                                   | 58           | 0.51162<br>8 | 3  |
|                   | Proportion of hydrological basins showing high surface water extent changes (SDG 6.6.1.) | %                                                   | 25           | 0.75         | 3  |
|                   | Tap water price per GDP per capita                                                       | USD/10 <sup>3</sup> m <sup>3</sup> /(USD/inh<br>ab) | 0.06997<br>8 | 0.04789<br>4 | 14 |
|                   | Final point                                                                              | -                                                   | -            | 0.45501<br>1 |    |
| <b>Barbados</b>   | Water use efficiency (SDG 6.4.1.)                                                        | USD/m <sup>3</sup>                                  | 41.5941<br>5 | 0.54731<br>5 | 1  |
|                   | Water stress (SDG 6.4.2.)                                                                | %                                                   | 87.5         | 0.38856<br>3 | 1  |
|                   | Total population with access to safe drinking water (SDG 6.1.1.)                         | %                                                   | 99.7         | 0.99411<br>8 | 1  |
|                   | Proportion of safely treated domestic wastewater flows (SDG 6.3.1.)                      | %                                                   | 2.8          | 0.02240<br>7 | 15 |
|                   | Degree of integrated water resources management implementation (SDG 6.5.1.)              | %                                                   | 46           | 0.37209<br>3 | 3  |
|                   | Proportion of hydrological basins showing high surface water extent changes (SDG 6.6.1.) | %                                                   | 100          | 0            | 3  |
|                   | Tap water price per GDP per capita                                                       | USD/10 <sup>3</sup> m <sup>3</sup> /(USD/inh<br>ab) | 0.15016<br>9 | 0.10278      | 16 |
|                   | Final point                                                                              | -                                                   | -            | 0.34675<br>4 |    |
| <b>Belarus</b>    | Water use efficiency (SDG 6.4.1.)                                                        | USD/m <sup>3</sup>                                  | 35.4265<br>4 | 0.52565<br>1 | 1  |
|                   | Water stress (SDG 6.4.2.)                                                                | %                                                   | 4.37706      | 0.69610<br>7 | 1  |
|                   | Total population with access to safe drinking water (SDG 6.1.1.)                         | %                                                   | 99.7         | 0.99411<br>8 | 1  |
|                   | Proportion of safely treated domestic wastewater flows (SDG 6.3.1.)                      | %                                                   | 56.4711<br>1 | 0.56220<br>7 | 3  |
|                   | Degree of integrated water resources                                                     | %                                                   | 54           | 0.46511      | 3  |

|                |                                                                                          |                                                 |          |          |    |
|----------------|------------------------------------------------------------------------------------------|-------------------------------------------------|----------|----------|----|
|                | management implementation (SDG 6.5.1.)                                                   |                                                 |          | 6        |    |
|                | Proportion of hydrological basins showing high surface water extent changes (SDG 6.6.1.) | %                                               | 6        | 0.94     | 3  |
|                | Tap water price per GDP per capita                                                       | USD/10 <sup>3</sup> m <sup>3</sup> /(USD/inhab) | 0.056452 | 0.038637 | 17 |
|                | Final point                                                                              | -                                               | -        | 0.603119 |    |
| <b>Belgium</b> | Water use efficiency (SDG 6.4.1.)                                                        | USD/m <sup>3</sup>                              | 97.49158 | 0.662291 | 1  |
|                | Water stress (SDG 6.4.2.)                                                                | %                                               | 51.58477 | 0.442818 | 1  |
|                | Total population with access to safe drinking water (SDG 6.1.1.)                         | %                                               | 100      | 1        | 1  |
|                | Proportion of safely treated domestic wastewater flows (SDG 6.3.1.)                      | %                                               | 91.7866  | 0.917393 | 3  |
|                | Degree of integrated water resources management implementation (SDG 6.5.1.)              | %                                               | 82       | 0.790698 | 3  |
|                | Proportion of hydrological basins showing high surface water extent changes (SDG 6.6.1.) | %                                               | 25       | 0.75     | 3  |
|                | Tap water price per GDP per capita                                                       | USD/10 <sup>3</sup> m <sup>3</sup> /(USD/inhab) | 0.08528  | 0.058368 | 10 |
|                | Final point                                                                              | -                                               | -        | 0.660224 |    |
| <b>Belize</b>  | Water use efficiency (SDG 6.4.1.)                                                        | USD/m <sup>3</sup>                              | 11.52776 | 0.374109 | 1  |
|                | Water stress (SDG 6.4.2.)                                                                | %                                               | 1.260294 | 0.823943 | 1  |
|                | Total population with access to safe drinking water (SDG 6.1.1.)                         | %                                               | 99.5     | 0.990196 | 1  |
|                | Proportion of safely treated domestic wastewater flows (SDG 6.3.1.)                      | %                                               | 17.2     | 0.167236 | 18 |
|                | Degree of integrated water resources management implementation (SDG 6.5.1.)              | %                                               | 21       | 0.081395 | 3  |
|                | Proportion of hydrological basins showing high surface water extent changes (SDG 6.6.1.) | %                                               | 0        | 1        | 3  |
|                | Tap water price per GDP per capita                                                       | USD/10 <sup>3</sup> m <sup>3</sup> /(USD/inhab) | 0.714693 | 0.489154 | 19 |
|                | Final point                                                                              | -                                               | -        | 0.560862 |    |
| <b>Benin</b>   | Water use efficiency (SDG 6.4.1.)                                                        | USD/m <sup>3</sup>                              | 39.55393 | 0.540526 | 1  |
|                | Water stress (SDG 6.4.2.)                                                                | %                                               | 0.975244 | 0.850271 | 1  |
|                | Total population with access to safe drinking water (SDG 6.1.1.)                         | %                                               | 77.9     | 0.566667 | 1  |
|                | Proportion of safely treated domestic wastewater flows (SDG 6.3.1.)                      | %                                               | 4.3      | 0.037494 | 20 |
|                | Degree of integrated water resources management implementation (SDG 6.5.1.)              | %                                               | 68       | 0.627907 | 3  |
|                | Proportion of hydrological basins                                                        | %                                               | 41       | 0.59     | 3  |

|                |                                                                                          |                                                  |          |          |    |
|----------------|------------------------------------------------------------------------------------------|--------------------------------------------------|----------|----------|----|
|                | showing high surface water extent changes (SDG 6.6.1.)                                   |                                                  |          |          |    |
|                | Tap water price per GDP per capita                                                       | USD/10 <sup>3</sup> m <sup>3</sup> /(USD/inh ab) | 0.749474 | 0.512959 | 21 |
|                | Final point                                                                              | -                                                | -        | 0.532261 |    |
| <b>Bhutan</b>  | Water use efficiency (SDG 6.4.1.)                                                        | USD/m <sup>3</sup>                               | 6.069276 | 0.287517 | 1  |
|                | Water stress (SDG 6.4.2.)                                                                | %                                                | 1.413808 | 0.812142 | 1  |
|                | Total population with access to safe drinking water (SDG 6.1.1.)                         | %                                                | 100      | 1        | 1  |
|                | Proportion of safely treated domestic wastewater flows (SDG 6.3.1.)                      | %                                                | 40.99144 | 0.406519 | 3  |
|                | Degree of integrated water resources management implementation (SDG 6.5.1.)              | %                                                | 33       | 0.22093  | 3  |
|                | Proportion of hydrological basins showing high surface water extent changes (SDG 6.6.1.) | %                                                | 12       | 0.88     | 3  |
|                | Tap water price per GDP per capita                                                       | USD/10 <sup>3</sup> m <sup>3</sup> /(USD/inh ab) | 0.021753 | 0.014888 | 22 |
|                | Final point                                                                              | -                                                | -        | 0.517428 |    |
| <b>Bolivia</b> | Water use efficiency (SDG 6.4.1.)                                                        | USD/m <sup>3</sup>                               | 12.96865 | 0.390006 | 1  |
|                | Water stress (SDG 6.4.2.)                                                                | %                                                | 1.177001 | 0.830964 | 1  |
|                | Total population with access to safe drinking water (SDG 6.1.1.)                         | %                                                | 90       | 0.803922 | 1  |
|                | Proportion of safely treated domestic wastewater flows (SDG 6.3.1.)                      | %                                                | 58.29204 | 0.580521 | 3  |
|                | Degree of integrated water resources management implementation (SDG 6.5.1.)              | %                                                | 52       | 0.44186  | 3  |
|                | Proportion of hydrological basins showing high surface water extent changes (SDG 6.6.1.) | %                                                | 16       | 0.84     | 3  |
|                | Tap water price per GDP per capita                                                       | USD/10 <sup>3</sup> m <sup>3</sup> /(USD/inh ab) | 0.102135 | 0.069904 | 23 |
|                | Final point                                                                              | -                                                | -        | 0.565311 |    |
| <b>Brazil</b>  | Water use efficiency (SDG 6.4.1.)                                                        | USD/m <sup>3</sup>                               | 21.2887  | 0.456908 | 1  |
|                | Water stress (SDG 6.4.2.)                                                                | %                                                | 1.479304 | 0.807492 | 1  |
|                | Total population with access to safe drinking water (SDG 6.1.1.)                         | %                                                | 98.1     | 0.962745 | 1  |
|                | Proportion of safely treated domestic wastewater flows (SDG 6.3.1.)                      | %                                                | 33.02745 | 0.326421 | 3  |
|                | Degree of integrated water resources management implementation (SDG 6.5.1.)              | %                                                | 63       | 0.569767 | 3  |
|                | Proportion of hydrological basins showing high surface water extent changes (SDG 6.6.1.) | %                                                | 21       | 0.79     | 3  |
|                | Tap water price per GDP per capita                                                       | USD/10 <sup>3</sup> m <sup>3</sup> /(USD/inh ab) | 0.21333  | 0.14601  | 10 |

|                     |                                                                                          |                                                     |              |              |    |
|---------------------|------------------------------------------------------------------------------------------|-----------------------------------------------------|--------------|--------------|----|
|                     |                                                                                          | ab)                                                 | 4            | 1            |    |
|                     | Final point                                                                              | -                                                   | -            | 0.57990<br>6 |    |
| <b>Bulgaria</b>     | Water use efficiency (SDG 6.4.1.)                                                        | USD/m <sup>3</sup>                                  | 9.01502<br>7 | 0.34092<br>2 | 1  |
|                     | Water stress (SDG 6.4.2.)                                                                | %                                                   | 37.5194      | 0.47550<br>8 | 1  |
|                     | Total population with access to safe drinking water (SDG 6.1.1.)                         | %                                                   | 99.4         | 0.98823<br>5 | 1  |
|                     | Proportion of safely treated domestic wastewater flows (SDG 6.3.1.)                      | %                                                   | 79.1923<br>9 | 0.79072<br>7 | 3  |
|                     | Degree of integrated water resources management implementation (SDG 6.5.1.)              | %                                                   | 69           | 0.63953<br>5 | 3  |
|                     | Proportion of hydrological basins showing high surface water extent changes (SDG 6.6.1.) | %                                                   | 8            | 0.92         | 3  |
|                     | Tap water price per GDP per capita                                                       | USD/10 <sup>3</sup> m <sup>3</sup> /(USD/inh<br>ab) | 0.14018<br>6 | 0.09594<br>7 | 24 |
|                     | Final point                                                                              | -                                                   | -            | 0.60726<br>8 |    |
| <b>Burkina Faso</b> | Water use efficiency (SDG 6.4.1.)                                                        | USD/m <sup>3</sup>                                  | 13.3588<br>6 | 0.39400<br>8 | 1  |
|                     | Water stress (SDG 6.4.2.)                                                                | %                                                   | 7.82026<br>8 | 0.63651<br>9 | 1  |
|                     | Total population with access to safe drinking water (SDG 6.1.1.)                         | %                                                   | 82.3         | 0.65294<br>1 | 1  |
|                     | Proportion of safely treated domestic wastewater flows (SDG 6.3.1.)                      | %                                                   | 2.3          | 0.01737<br>9 | 25 |
|                     | Degree of integrated water resources management implementation (SDG 6.5.1.)              | %                                                   | 66           | 0.60465<br>1 | 3  |
|                     | Proportion of hydrological basins showing high surface water extent changes (SDG 6.6.1.) | %                                                   | 42           | 0.58         | 3  |
|                     | Tap water price per GDP per capita                                                       | USD/10 <sup>3</sup> m <sup>3</sup> /(USD/inh<br>ab) | 1.04702<br>5 | 0.71661<br>1 | 26 |
|                     | Final point                                                                              | -                                                   | -            | 0.51458<br>7 |    |
| <b>Cambodia</b>     | Water use efficiency (SDG 6.4.1.)                                                        | USD/m <sup>3</sup>                                  | 7.82912<br>9 | 0.32188<br>4 | 1  |
|                     | Water stress (SDG 6.4.2.)                                                                | %                                                   | 1.03654<br>5 | 0.84401<br>2 | 1  |
|                     | Total population with access to safe drinking water (SDG 6.1.1.)                         | %                                                   | 75.5         | 0.51960<br>8 | 1  |
|                     | Proportion of safely treated domestic wastewater flows (SDG 6.3.1.)                      | %                                                   | 30.6         | 0.30200<br>7 | 27 |
|                     | Degree of integrated water resources management implementation (SDG 6.5.1.)              | %                                                   | 59           | 0.52325<br>6 | 3  |
|                     | Proportion of hydrological basins showing high surface water extent changes (SDG 6.6.1.) | %                                                   | 27           | 0.73         | 3  |
|                     | Tap water price per GDP per capita                                                       | USD/10 <sup>3</sup> m <sup>3</sup> /(USD/inh<br>ab) | 0.18509<br>6 | 0.12668<br>4 | 28 |
|                     | Final point                                                                              | -                                                   | -            | 0.48106<br>4 |    |

|                                 |                                                                                          |                                                     |              |              |    |
|---------------------------------|------------------------------------------------------------------------------------------|-----------------------------------------------------|--------------|--------------|----|
| <b>Cameroon</b>                 | Water use efficiency (SDG 6.4.1.)                                                        | USD/m <sup>3</sup>                                  | 25.0475<br>9 | 0.47885<br>6 | 1  |
|                                 | Water stress (SDG 6.4.2.)                                                                | %                                                   | 1.56043      | 0.80201      | 1  |
|                                 | Total population with access to safe drinking water (SDG 6.1.1.)                         | %                                                   | 75.6         | 0.52156<br>9 | 1  |
|                                 | Proportion of safely treated domestic wastewater flows (SDG 6.3.1.)                      | %                                                   | 8.3          | 0.07772<br>4 | 29 |
|                                 | Degree of integrated water resources management implementation (SDG 6.5.1.)              | %                                                   | 40           | 0.30232<br>6 | 3  |
|                                 | Proportion of hydrological basins showing high surface water extent changes (SDG 6.6.1.) | %                                                   | 47           | 0.53         | 3  |
|                                 | Tap water price per GDP per capita                                                       | USD/10 <sup>3</sup> m <sup>3</sup> /(USD/inh<br>ab) | 0.29287<br>9 | 0.20045<br>4 | 30 |
|                                 | Final point                                                                              | -                                                   | -            | 0.41613<br>4 |    |
| <b>Central African Republic</b> | Water use efficiency (SDG 6.4.1.)                                                        | USD/m <sup>3</sup>                                  | 17.5943<br>5 | 0.43118<br>1 | 1  |
|                                 | Water stress (SDG 6.4.2.)                                                                | %                                                   | 0.33564<br>8 | 0.95978<br>9 | 1  |
|                                 | Total population with access to safe drinking water (SDG 6.1.1.)                         | %                                                   | 68.5         | 0.38235<br>3 | 1  |
|                                 | Proportion of safely treated domestic wastewater flows (SDG 6.3.1.)                      | %                                                   | 0.57208      | 0            | 3  |
|                                 | Degree of integrated water resources management implementation (SDG 6.5.1.)              | %                                                   | 37           | 0.26744<br>2 | 3  |
|                                 | Proportion of hydrological basins showing high surface water extent changes (SDG 6.6.1.) | %                                                   | 9            | 0.91         | 3  |
|                                 | Tap water price per GDP per capita                                                       | USD/10 <sup>3</sup> m <sup>3</sup> /(USD/inh<br>ab) | 1.35130<br>5 | 0.92486<br>7 | 31 |
|                                 | Final point                                                                              | -                                                   | -            | 0.55366<br>2 |    |
| <b>Chad</b>                     | Water use efficiency (SDG 6.4.1.)                                                        | USD/m <sup>3</sup>                                  | 10.4702<br>7 | 0.36112<br>1 | 1  |
|                                 | Water stress (SDG 6.4.2.)                                                                | %                                                   | 4.29492<br>2 | 0.69805<br>2 | 1  |
|                                 | Total population with access to safe drinking water (SDG 6.1.1.)                         | %                                                   | 50.8         | 0.03529<br>4 | 1  |
|                                 | Proportion of safely treated domestic wastewater flows (SDG 6.3.1.)                      | %                                                   | 2.26226      | 0.01699<br>9 | 3  |
|                                 | Degree of integrated water resources management implementation (SDG 6.5.1.)              | %                                                   | 37           | 0.26744<br>2 | 3  |
|                                 | Proportion of hydrological basins showing high surface water extent changes (SDG 6.6.1.) | %                                                   | 7            | 0.93         | 3  |
|                                 | Tap water price per GDP per capita                                                       | USD/10 <sup>3</sup> m <sup>3</sup> /(USD/inh<br>ab) | 1.00137<br>4 | 0.68536<br>5 | 32 |
|                                 | Final point                                                                              | -                                                   | -            | 0.42775<br>3 |    |
| <b>Chile</b>                    | Water use efficiency (SDG 6.4.1.)                                                        | USD/m <sup>3</sup>                                  | 6.93197<br>4 | 0.30545<br>6 | 1  |



|                 |                                                                                          |                                                  |              |              |    |
|-----------------|------------------------------------------------------------------------------------------|--------------------------------------------------|--------------|--------------|----|
|                 | Water stress (SDG 6.4.2.)                                                                | %                                                | 8.98212<br>1 | 0.62229<br>7 | 1  |
|                 | Total population with access to safe drinking water (SDG 6.1.1.)                         | %                                                | 99           | 0.98039<br>2 | 1  |
|                 | Proportion of safely treated domestic wastewater flows (SDG 6.3.1.)                      | %                                                | 90.5327<br>5 | 0.90478<br>3 | 3  |
|                 | Degree of integrated water resources management implementation (SDG 6.5.1.)              | %                                                | 32           | 0.20930<br>2 | 3  |
|                 | Proportion of hydrological basins showing high surface water extent changes (SDG 6.6.1.) | %                                                | 34           | 0.66         | 3  |
|                 | Tap water price per GDP per capita                                                       | USD/10 <sup>3</sup> m <sup>3</sup> /(USD/inh ab) | 0.08086<br>6 | 0.05534<br>7 | 10 |
|                 | Final point                                                                              | -                                                | -            | 0.53394      |    |
| <b>China</b>    | Water use efficiency (SDG 6.4.1.)                                                        | USD/m <sup>3</sup>                               | 25.8148<br>6 | 0.48292<br>8 | 1  |
|                 | Water stress (SDG 6.4.2.)                                                                | %                                                | 41.5185<br>3 | 0.46510<br>8 | 1  |
|                 | Total population with access to safe drinking water (SDG 6.1.1.)                         | %                                                | 95.5         | 0.91176<br>5 | 1  |
|                 | Proportion of safely treated domestic wastewater flows (SDG 6.3.1.)                      | %                                                | 64.7798<br>6 | 0.64577<br>2 | 3  |
|                 | Degree of integrated water resources management implementation (SDG 6.5.1.)              | %                                                | 80           | 0.76744<br>2 | 3  |
|                 | Proportion of hydrological basins showing high surface water extent changes (SDG 6.6.1.) | %                                                | 37           | 0.63         | 3  |
|                 | Tap water price per GDP per capita                                                       | USD/10 <sup>3</sup> m <sup>3</sup> /(USD/inh ab) | 0.05465<br>2 | 0.03740<br>5 | 10 |
|                 | Final point                                                                              | -                                                | -            | 0.56291<br>7 |    |
| <b>Colombia</b> | Water use efficiency (SDG 6.4.1.)                                                        | USD/m <sup>3</sup>                               | 8.63093<br>5 | 0.33504<br>5 | 1  |
|                 | Water stress (SDG 6.4.2.)                                                                | %                                                | 4.35863<br>3 | 0.69654      | 1  |
|                 | Total population with access to safe drinking water (SDG 6.1.1.)                         | %                                                | 91.4         | 0.83137<br>3 | 1  |
|                 | Proportion of safely treated domestic wastewater flows (SDG 6.3.1.)                      | %                                                | 21.2628<br>1 | 0.20809<br>8 | 3  |
|                 | Degree of integrated water resources management implementation (SDG 6.5.1.)              | %                                                | 57           | 0.5          | 3  |
|                 | Proportion of hydrological basins showing high surface water extent changes (SDG 6.6.1.) | %                                                | 14           | 0.86         | 3  |
|                 | Tap water price per GDP per capita                                                       | USD/10 <sup>3</sup> m <sup>3</sup> /(USD/inh ab) | 0.22127<br>3 | 0.15144<br>5 | 10 |
|                 | Final point                                                                              | -                                                | -            | 0.51178<br>6 |    |
| <b>Comoros</b>  | Water use efficiency (SDG 6.4.1.)                                                        | USD/m <sup>3</sup>                               | 70.0410<br>5 | 0.61765<br>6 | 1  |
|                 | Water stress (SDG 6.4.2.)                                                                | %                                                | 0.83333<br>3 | 0.86641<br>7 | 1  |
|                 | Total population with access to safe drinking water (SDG 6.1.1.)                         | %                                                | 90.1         | 0.80588<br>2 | 1  |

|                      |                                                                                          |                                                 |          |          |    |
|----------------------|------------------------------------------------------------------------------------------|-------------------------------------------------|----------|----------|----|
|                      | Proportion of safely treated domestic wastewater flows (SDG 6.3.1.)                      | %                                               | 5.6      | 0.050568 | 3  |
|                      | Degree of integrated water resources management implementation (SDG 6.5.1.)              | %                                               | 20       | 0.069767 | 3  |
|                      | Proportion of hydrological basins showing high surface water extent changes (SDG 6.6.1.) | %                                               | 100      | 0        | 3  |
|                      | Tap water price per GDP per capita                                                       | USD/10 <sup>3</sup> m <sup>3</sup> /(USD/inhab) | 0.14078  | 0.096354 |    |
|                      | Final point                                                                              | -                                               | -        | 0.358092 |    |
| <b>Costa Rica</b>    | Water use efficiency (SDG 6.4.1.)                                                        | USD/m <sup>3</sup>                              | 17.49045 | 0.430381 | 1  |
|                      | Water stress (SDG 6.4.2.)                                                                | %                                               | 5.351672 | 0.675466 | 1  |
|                      | Total population with access to safe drinking water (SDG 6.1.1.)                         | %                                               | 97.8     | 0.956863 | 1  |
|                      | Proportion of safely treated domestic wastewater flows (SDG 6.3.1.)                      | %                                               | 23.27405 | 0.228326 | 33 |
|                      | Degree of integrated water resources management implementation (SDG 6.5.1.)              | %                                               | 51       | 0.430233 | 3  |
|                      | Proportion of hydrological basins showing high surface water extent changes (SDG 6.6.1.) | %                                               | 58       | 0.42     | 3  |
|                      | Tap water price per GDP per capita                                                       | USD/10 <sup>3</sup> m <sup>3</sup> /(USD/inhab) | 0.073695 | 0.050439 | 34 |
|                      | Final point                                                                              | -                                               | -        | 0.455958 |    |
| <b>Côte d'Ivoire</b> | Water use efficiency (SDG 6.4.1.)                                                        | USD/m <sup>3</sup>                              | 38.51349 | 0.536928 | 1  |
|                      | Water stress (SDG 6.4.2.)                                                                | %                                               | 5.087566 | 0.680662 | 1  |
|                      | Total population with access to safe drinking water (SDG 6.1.1.)                         | %                                               | 81.9     | 0.645098 | 1  |
|                      | Proportion of safely treated domestic wastewater flows (SDG 6.3.1.)                      | %                                               | 14.2     | 0.137063 | 36 |
|                      | Degree of integrated water resources management implementation (SDG 6.5.1.)              | %                                               | 40       | 0.302326 | 3  |
|                      | Proportion of hydrological basins showing high surface water extent changes (SDG 6.6.1.) | %                                               | 20       | 0.8      | 3  |
|                      | Tap water price per GDP per capita                                                       | USD/10 <sup>3</sup> m <sup>3</sup> /(USD/inhab) | 0.21571  | 0.147637 | 37 |
|                      | Final point                                                                              | -                                               | -        | 0.464245 |    |
| <b>Croatia</b>       | Water use efficiency (SDG 6.4.1.)                                                        | USD/m <sup>3</sup>                              | 34.47009 | 0.521956 | 1  |
|                      | Water stress (SDG 6.4.2.)                                                                | %                                               | 1.478435 | 0.807552 | 1  |
|                      | Total population with access to safe drinking water (SDG 6.1.1.)                         | %                                               | 99.6     | 0.992157 | 1  |
|                      | Proportion of safely treated domestic wastewater flows (SDG 6.3.1.)                      | %                                               | 60.32014 | 0.600918 | 3  |
|                      | Degree of integrated water resources                                                     | %                                               | 90       | 0.88372  | 3  |

|                |                                                                                          |                                                 |          |          |    |
|----------------|------------------------------------------------------------------------------------------|-------------------------------------------------|----------|----------|----|
|                | management implementation (SDG 6.5.1.)                                                   |                                                 |          | 1        |    |
|                | Proportion of hydrological basins showing high surface water extent changes (SDG 6.6.1.) | %                                               | 5        | 0.95     | 3  |
|                | Tap water price per GDP per capita                                                       | USD/10 <sup>3</sup> m <sup>3</sup> /(USD/inhab) | 0.132766 | 0.090869 | 10 |
|                | Final point                                                                              | -                                               | -        | 0.692453 |    |
| <b>Cuba</b>    | Water use efficiency (SDG 6.4.1.)                                                        | USD/m <sup>3</sup>                              | 11.18823 | 0.370073 | 1  |
|                | Water stress (SDG 6.4.2.)                                                                | %                                               | 23.93945 | 0.521644 | 1  |
|                | Total population with access to safe drinking water (SDG 6.1.1.)                         | %                                               | 94.9     | 0.9      | 1  |
|                | Proportion of safely treated domestic wastewater flows (SDG 6.3.1.)                      | %                                               | 24.18225 | 0.23746  | 3  |
|                | Degree of integrated water resources management implementation (SDG 6.5.1.)              | %                                               | 82       | 0.790698 | 3  |
|                | Proportion of hydrological basins showing high surface water extent changes (SDG 6.6.1.) | %                                               | 20       | 0.8      | 3  |
|                | Tap water price per GDP per capita                                                       | USD/10 <sup>3</sup> m <sup>3</sup> /(USD/inhab) | 0.00422  | 0.002889 | 38 |
|                | Final point                                                                              | -                                               | -        | 0.517538 |    |
| <b>Cyprus</b>  | Water use efficiency (SDG 6.4.1.)                                                        | USD/m <sup>3</sup>                              | 74.94174 | 0.626784 | 1  |
|                | Water stress (SDG 6.4.2.)                                                                | %                                               | 37.58885 | 0.475318 | 1  |
|                | Total population with access to safe drinking water (SDG 6.1.1.)                         | %                                               | 100      | 1        | 1  |
|                | Proportion of safely treated domestic wastewater flows (SDG 6.3.1.)                      | %                                               | 67.18718 | 0.669984 | 3  |
|                | Degree of integrated water resources management implementation (SDG 6.5.1.)              | %                                               | 93       | 0.918605 | 3  |
|                | Proportion of hydrological basins showing high surface water extent changes (SDG 6.6.1.) | %                                               | 0        | 1        | 3  |
|                | Tap water price per GDP per capita                                                       | USD/10 <sup>3</sup> m <sup>3</sup> /(USD/inhab) | 0.03519  | 0.024085 | 39 |
|                | Final point                                                                              | -                                               | -        | 0.673539 |    |
| <b>Czechia</b> | Water use efficiency (SDG 6.4.1.)                                                        | USD/m <sup>3</sup>                              | 132.4734 | 0.703678 | 1  |
|                | Water stress (SDG 6.4.2.)                                                                | %                                               | 20.77251 | 0.536213 | 1  |
|                | Total population with access to safe drinking water (SDG 6.1.1.)                         | %                                               | 100      | 1        | 1  |
|                | Proportion of safely treated domestic wastewater flows (SDG 6.3.1.)                      | %                                               | 90.12544 | 0.900686 | 3  |
|                | Degree of integrated water resources management implementation (SDG 6.5.1.)              | %                                               | 80       | 0.767442 | 3  |
|                | Proportion of hydrological basins                                                        | %                                               | 0        | 1        | 3  |

|                           |                                                                                          |                                                  |          |          |    |
|---------------------------|------------------------------------------------------------------------------------------|--------------------------------------------------|----------|----------|----|
|                           | showing high surface water extent changes (SDG 6.6.1.)                                   |                                                  |          |          |    |
|                           | Tap water price per GDP per capita                                                       | USD/10 <sup>3</sup> m <sup>3</sup> /(USD/inh ab) | 0.148403 | 0.101571 | 10 |
|                           | Final point                                                                              | -                                                | -        | 0.715656 |    |
| <b>D. R. Congo</b>        | Water use efficiency (SDG 6.4.1.)                                                        | USD/m <sup>3</sup>                               | 50.82696 | 0.574374 | 1  |
|                           | Water stress (SDG 6.4.2.)                                                                | %                                                | 0.226884 | 1        | 1  |
|                           | Total population with access to safe drinking water (SDG 6.1.1.)                         | %                                                | 52.4     | 0.066667 | 1  |
|                           | Proportion of safely treated domestic wastewater flows (SDG 6.3.1.)                      | %                                                | 12.26042 | 0.117556 | 3  |
|                           | Degree of integrated water resources management implementation (SDG 6.5.1.)              | %                                                | 32       | 0.209302 | 3  |
|                           | Proportion of hydrological basins showing high surface water extent changes (SDG 6.6.1.) | %                                                | 18       | 0.82     | 3  |
|                           | Tap water price per GDP per capita                                                       | USD/10 <sup>3</sup> m <sup>3</sup> /(USD/inh ab) | 1.008136 | 0.689994 | 40 |
|                           | Final point                                                                              | -                                                | -        | 0.496842 |    |
| <b>Denmark</b>            | Water use efficiency (SDG 6.4.1.)                                                        | USD/m <sup>3</sup>                               | 288.4215 | 0.808698 | 1  |
|                           | Water stress (SDG 6.4.2.)                                                                | %                                                | 26.40427 | 0.511581 | 1  |
|                           | Total population with access to safe drinking water (SDG 6.1.1.)                         | %                                                | 100      | 1        | 1  |
|                           | Proportion of safely treated domestic wastewater flows (SDG 6.3.1.)                      | %                                                | 95.94201 | 0.959187 | 3  |
|                           | Degree of integrated water resources management implementation (SDG 6.5.1.)              | %                                                | 95       | 0.94186  | 3  |
|                           | Proportion of hydrological basins showing high surface water extent changes (SDG 6.6.1.) | %                                                | 14       | 0.86     | 3  |
|                           | Tap water price per GDP per capita                                                       | USD/10 <sup>3</sup> m <sup>3</sup> /(USD/inh ab) | 0.078241 | 0.05355  | 10 |
|                           | Final point                                                                              | -                                                | -        | 0.733554 |    |
| <b>Dominican Republic</b> | Water use efficiency (SDG 6.4.1.)                                                        | USD/m <sup>3</sup>                               | 8.204755 | 0.32821  | 1  |
|                           | Water stress (SDG 6.4.2.)                                                                | %                                                | 39.55331 | 0.470087 | 1  |
|                           | Total population with access to safe drinking water (SDG 6.1.1.)                         | %                                                | 84.7     | 0.7      | 1  |
|                           | Proportion of safely treated domestic wastewater flows (SDG 6.3.1.)                      | %                                                | 20.4     | 0.19942  | 41 |
|                           | Degree of integrated water resources management implementation (SDG 6.5.1.)              | %                                                | 36       | 0.255814 | 3  |
|                           | Proportion of hydrological basins showing high surface water extent changes (SDG 6.6.1.) | %                                                | 0        | 1        | 3  |
|                           | Tap water price per GDP per capita                                                       | USD/10 <sup>3</sup> m <sup>3</sup> /(USD/inh ab) | 0.10731  | 0.07345  | 10 |

|                    |                                                                                          |                                                  |         |         |    |
|--------------------|------------------------------------------------------------------------------------------|--------------------------------------------------|---------|---------|----|
|                    |                                                                                          | ab)                                              | 7       |         |    |
|                    | Final point                                                                              | -                                                | -       | 0.43242 | 6  |
| <b>Ecuador</b>     | Water use efficiency (SDG 6.4.1.)                                                        | USD/m <sup>3</sup>                               | 8.52178 | 0.33332 | 1  |
|                    |                                                                                          |                                                  | 6       | 7       |    |
|                    | Water stress (SDG 6.4.2.)                                                                | %                                                | 6.78235 | 0.65114 | 1  |
|                    |                                                                                          |                                                  | 3       |         |    |
|                    | Total population with access to safe drinking water (SDG 6.1.1.)                         | %                                                | 86.9    | 0.74313 | 1  |
|                    |                                                                                          |                                                  |         | 7       |    |
|                    | Proportion of safely treated domestic wastewater flows (SDG 6.3.1.)                      | %                                                | 31.1117 | 0.30715 | 3  |
|                    |                                                                                          |                                                  | 1       | 3       |    |
|                    | Degree of integrated water resources management implementation (SDG 6.5.1.)              | %                                                | 38      | 0.27907 | 3  |
|                    |                                                                                          |                                                  |         |         |    |
|                    | Proportion of hydrological basins showing high surface water extent changes (SDG 6.6.1.) | %                                                | 63      | 0.37    | 3  |
|                    |                                                                                          |                                                  |         |         |    |
|                    | Tap water price per GDP per capita                                                       | USD/10 <sup>3</sup> m <sup>3</sup> /(USD/inh ab) | 0.00071 | 0.00048 | 42 |
|                    |                                                                                          |                                                  | 4       | 9       |    |
|                    | Final point                                                                              | -                                                | -       | 0.38347 | 4  |
| <b>Egypt</b>       | Water use efficiency (SDG 6.4.1.)                                                        | USD/m <sup>3</sup>                               | 4.87322 | 0.25789 | 1  |
|                    |                                                                                          |                                                  | 5       | 1       |    |
|                    | Water stress (SDG 6.4.2.)                                                                | %                                                | 141.165 | 0.33945 | 1  |
|                    |                                                                                          |                                                  | 8       | 3       |    |
|                    | Total population with access to safe drinking water (SDG 6.1.1.)                         | %                                                | 99.4    | 0.98823 | 1  |
|                    |                                                                                          |                                                  |         | 5       |    |
|                    | Proportion of safely treated domestic wastewater flows (SDG 6.3.1.)                      | %                                                | 45.5452 | 0.45232 | 3  |
|                    |                                                                                          |                                                  | 7       |         |    |
|                    | Degree of integrated water resources management implementation (SDG 6.5.1.)              | %                                                | 42      | 0.32558 | 3  |
|                    |                                                                                          |                                                  |         | 1       |    |
|                    | Proportion of hydrological basins showing high surface water extent changes (SDG 6.6.1.) | %                                                | 18      | 0.82    | 3  |
|                    |                                                                                          |                                                  |         |         |    |
|                    | Tap water price per GDP per capita                                                       | USD/10 <sup>3</sup> m <sup>3</sup> /(USD/inh ab) | 0.02216 | 0.01517 | 10 |
|                    |                                                                                          |                                                  | 8       | 2       |    |
|                    | Final point                                                                              | -                                                | -       | 0.45695 |    |
| <b>El Salvador</b> | Water use efficiency (SDG 6.4.1.)                                                        | USD/m <sup>3</sup>                               | 9.60232 | 0.34944 | 1  |
|                    |                                                                                          |                                                  | 6       | 1       |    |
|                    | Water stress (SDG 6.4.2.)                                                                | %                                                | 2.42732 | 0.75664 | 1  |
|                    |                                                                                          |                                                  | 4       | 4       |    |
|                    | Total population with access to safe drinking water (SDG 6.1.1.)                         | %                                                | 93.8    | 0.87843 | 1  |
|                    |                                                                                          |                                                  |         | 1       |    |
|                    | Proportion of safely treated domestic wastewater flows (SDG 6.3.1.)                      | %                                                | 12.9498 | 0.12449 | 3  |
|                    |                                                                                          |                                                  | 4       |         |    |
|                    | Degree of integrated water resources management implementation (SDG 6.5.1.)              | %                                                | 23      | 0.10465 | 3  |
|                    |                                                                                          |                                                  |         | 1       |    |
|                    | Proportion of hydrological basins showing high surface water extent changes (SDG 6.6.1.) | %                                                | 20      | 0.8     | 3  |
|                    |                                                                                          |                                                  |         |         |    |
|                    | Tap water price per GDP per capita                                                       | USD/10 <sup>3</sup> m <sup>3</sup> /(USD/inh ab) | 0.06581 | 0.04504 | 43 |
|                    |                                                                                          |                                                  | 3       | 4       |    |
|                    | Final point                                                                              | -                                                | -       | 0.43695 | 7  |

|                                                                                          |                                                                                          |                                                     |                    |              |              |
|------------------------------------------------------------------------------------------|------------------------------------------------------------------------------------------|-----------------------------------------------------|--------------------|--------------|--------------|
| <b>Estonia</b>                                                                           | Water use efficiency (SDG 6.4.1.)                                                        | USD/m <sup>3</sup>                                  | 26.2878            | 0.48537<br>9 | 1            |
|                                                                                          | Water stress (SDG 6.4.2.)                                                                | %                                                   | 9.23108<br>5       | 0.61949      | 1            |
|                                                                                          | Total population with access to safe drinking water (SDG 6.1.1.)                         | %                                                   | 99.6               | 0.99215<br>7 | 1            |
|                                                                                          | Proportion of safely treated domestic wastewater flows (SDG 6.3.1.)                      | %                                                   | 91.0638<br>2       | 0.91012<br>4 | 3            |
|                                                                                          | Degree of integrated water resources management implementation (SDG 6.5.1.)              | %                                                   | 85                 | 0.82558<br>1 | 3            |
|                                                                                          | Proportion of hydrological basins showing high surface water extent changes (SDG 6.6.1.) | %                                                   | 0                  | 1            | 3            |
|                                                                                          | Tap water price per GDP per capita                                                       | USD/10 <sup>3</sup> m <sup>3</sup> /(USD/inh<br>ab) | 0.03895<br>2       | 0.02666      | 10           |
|                                                                                          | Final point                                                                              | -                                                   | -                  | 0.69419<br>9 |              |
|                                                                                          | <b>Eswatini</b>                                                                          | Water use efficiency (SDG 6.4.1.)                   | USD/m <sup>3</sup> | 3.45323<br>2 | 0.21139<br>8 |
| Water stress (SDG 6.4.2.)                                                                |                                                                                          | %                                                   | 77.5599<br>1       | 0.40094<br>4 | 1            |
| Total population with access to safe drinking water (SDG 6.1.1.)                         |                                                                                          | %                                                   | 74.1               | 0.49215<br>7 | 1            |
| Proportion of safely treated domestic wastewater flows (SDG 6.3.1.)                      |                                                                                          | %                                                   | 17.9052<br>6       | 0.17432<br>9 | 3            |
| Degree of integrated water resources management implementation (SDG 6.5.1.)              |                                                                                          | %                                                   | 59                 | 0.52325<br>6 | 3            |
| Proportion of hydrological basins showing high surface water extent changes (SDG 6.6.1.) |                                                                                          | %                                                   | 44                 | 0.56         | 3            |
| Tap water price per GDP per capita                                                       |                                                                                          | USD/10 <sup>3</sup> m <sup>3</sup> /(USD/inh<br>ab) | 1.46108            | 1            | 44           |
| Final point                                                                              |                                                                                          | -                                                   | -                  | 0.48029<br>8 |              |
| <b>Finland</b>                                                                           |                                                                                          | Water use efficiency (SDG 6.4.1.)                   | USD/m <sup>3</sup> | 59.4263<br>1 | 0.59547<br>2 |
|                                                                                          | Water stress (SDG 6.4.2.)                                                                | %                                                   | 7.11406<br>2       | 0.64623<br>7 | 1            |
|                                                                                          | Total population with access to safe drinking water (SDG 6.1.1.)                         | %                                                   | 100                | 1            | 1            |
|                                                                                          | Proportion of safely treated domestic wastewater flows (SDG 6.3.1.)                      | %                                                   | 92.2832<br>9       | 0.92238<br>9 | 3            |
|                                                                                          | Degree of integrated water resources management implementation (SDG 6.5.1.)              | %                                                   | 80                 | 0.76744<br>2 | 3            |
|                                                                                          | Proportion of hydrological basins showing high surface water extent changes (SDG 6.6.1.) | %                                                   | 8                  | 0.92         | 3            |
|                                                                                          | Tap water price per GDP per capita                                                       | USD/10 <sup>3</sup> m <sup>3</sup> /(USD/inh<br>ab) | 0.05689<br>6       | 0.03894<br>1 | 10           |
|                                                                                          | Final point                                                                              | -                                                   | -                  | 0.69864      |              |
|                                                                                          | <b>France</b>                                                                            | Water use efficiency (SDG 6.4.1.)                   | USD/m <sup>3</sup> | 80.6080<br>3 | 0.63662<br>3 |

|                |                                                                                          |                                                  |              |              |    |
|----------------|------------------------------------------------------------------------------------------|--------------------------------------------------|--------------|--------------|----|
|                | Water stress (SDG 6.4.2.)                                                                | %                                                | 22.9992<br>8 | 0.52575<br>7 | 1  |
|                | Total population with access to safe drinking water (SDG 6.1.1.)                         | %                                                | 100          | 1            | 1  |
|                | Proportion of safely treated domestic wastewater flows (SDG 6.3.1.)                      | %                                                | 92.5012<br>1 | 0.92458<br>1 | 3  |
|                | Degree of integrated water resources management implementation (SDG 6.5.1.)              | %                                                | 100          | 1            | 3  |
|                | Proportion of hydrological basins showing high surface water extent changes (SDG 6.6.1.) | %                                                | 5            | 0.95         | 3  |
|                | Tap water price per GDP per capita                                                       | USD/10 <sup>3</sup> m <sup>3</sup> /(USD/inh ab) | 0.07957<br>2 | 0.05446<br>1 | 10 |
|                | Final point                                                                              | -                                                | -            | 0.72734<br>6 |    |
| <b>Gabon</b>   | Water use efficiency (SDG 6.4.1.)                                                        | USD/m <sup>3</sup>                               | 97.0381<br>4 | 0.66166<br>2 | 1  |
|                | Water stress (SDG 6.4.2.)                                                                | %                                                | 0.50216<br>6 | 0.91842<br>4 | 1  |
|                | Total population with access to safe drinking water (SDG 6.1.1.)                         | %                                                | 93.2         | 0.86666<br>7 | 1  |
|                | Proportion of safely treated domestic wastewater flows (SDG 6.3.1.)                      | %                                                | 22.5         | 0.22054<br>1 | 45 |
|                | Degree of integrated water resources management implementation (SDG 6.5.1.)              | %                                                | 29           | 0.17441<br>9 | 3  |
|                | Proportion of hydrological basins showing high surface water extent changes (SDG 6.6.1.) | %                                                | 50           | 0.5          | 3  |
|                | Tap water price per GDP per capita                                                       | USD/10 <sup>3</sup> m <sup>3</sup> /(USD/inh ab) | 0.01767<br>5 | 0.01209<br>7 | 46 |
|                | Final point                                                                              | -                                                | -            | 0.47911<br>6 |    |
| <b>Gambia</b>  | Water use efficiency (SDG 6.4.1.)                                                        | USD/m <sup>3</sup>                               | 11.5158<br>7 | 0.37396<br>9 | 1  |
|                | Water stress (SDG 6.4.2.)                                                                | %                                                | 2.20965<br>6 | 0.76629<br>1 | 1  |
|                | Total population with access to safe drinking water (SDG 6.1.1.)                         | %                                                | 90.2         | 0.80784<br>3 | 1  |
|                | Proportion of safely treated domestic wastewater flows (SDG 6.3.1.)                      | %                                                | 11.1489<br>8 | 0.10637<br>8 | 3  |
|                | Degree of integrated water resources management implementation (SDG 6.5.1.)              | %                                                | 31           | 0.19767<br>4 | 3  |
|                | Proportion of hydrological basins showing high surface water extent changes (SDG 6.6.1.) | %                                                | 0            | 1            | 3  |
|                | Tap water price per GDP per capita                                                       | USD/10 <sup>3</sup> m <sup>3</sup> /(USD/inh ab) | 0.40928<br>8 | 0.28012<br>7 | 47 |
|                | Final point                                                                              | -                                                | -            | 0.50461<br>2 |    |
| <b>Georgia</b> | Water use efficiency (SDG 6.4.1.)                                                        | USD/m <sup>3</sup>                               | 8.27103<br>4 | 0.32929<br>6 | 1  |
|                | Water stress (SDG 6.4.2.)                                                                | %                                                | 5.38671      | 0.67479<br>6 | 1  |
|                | Total population with access to safe                                                     | %                                                | 100          | 1            | 1  |

|                |                                                                                          |                                                 |              |              |    |
|----------------|------------------------------------------------------------------------------------------|-------------------------------------------------|--------------|--------------|----|
|                | drinking water (SDG 6.1.1.)                                                              |                                                 |              |              |    |
|                | Proportion of safely treated domestic wastewater flows (SDG 6.3.1.)                      | %                                               | 45.9906      | 0.45679<br>8 | 3  |
|                | Degree of integrated water resources management implementation (SDG 6.5.1.)              | %                                               | 44           | 0.34883<br>7 | 3  |
|                | Proportion of hydrological basins showing high surface water extent changes (SDG 6.6.1.) | %                                               | 13           | 0.87         | 3  |
|                | Tap water price per GDP per capita                                                       | USD/10 <sup>3</sup> m <sup>3</sup> /(USD/inhab) | 0.05020<br>5 | 0.03436<br>1 | 48 |
|                | Final point                                                                              | -                                               | -            | 0.53058<br>4 |    |
| <b>Germany</b> | Water use efficiency (SDG 6.4.1.)                                                        | USD/m <sup>3</sup>                              | 108.400<br>9 | 0.67660<br>9 | 1  |
|                | Water stress (SDG 6.4.2.)                                                                | %                                               | 33.5019<br>2 | 0.48713<br>6 | 1  |
|                | Total population with access to safe drinking water (SDG 6.1.1.)                         | %                                               | 100          | 1            | 1  |
|                | Proportion of safely treated domestic wastewater flows (SDG 6.3.1.)                      | %                                               | 99.2620<br>6 | 0.99257<br>8 | 3  |
|                | Degree of integrated water resources management implementation (SDG 6.5.1.)              | %                                               | 89           | 0.87209<br>3 | 3  |
|                | Proportion of hydrological basins showing high surface water extent changes (SDG 6.6.1.) | %                                               | 0            | 1            | 3  |
|                | Tap water price per GDP per capita                                                       | USD/10 <sup>3</sup> m <sup>3</sup> /(USD/inhab) | 0.08320<br>9 | 0.05695      | 10 |
|                | Final point                                                                              | -                                               | -            | 0.72648<br>1 |    |
| <b>Ghana</b>   | Water use efficiency (SDG 6.4.1.)                                                        | USD/m <sup>3</sup>                              | 32.5847      | 0.51436<br>4 | 1  |
|                | Water stress (SDG 6.4.2.)                                                                | %                                               | 6.31473<br>4 | 0.65847<br>5 | 1  |
|                | Total population with access to safe drinking water (SDG 6.1.1.)                         | %                                               | 88.7         | 0.77843<br>1 | 1  |
|                | Proportion of safely treated domestic wastewater flows (SDG 6.3.1.)                      | %                                               | 12.1257<br>7 | 0.11620<br>2 | 3  |
|                | Degree of integrated water resources management implementation (SDG 6.5.1.)              | %                                               | 57           | 0.5          | 3  |
|                | Proportion of hydrological basins showing high surface water extent changes (SDG 6.6.1.) | %                                               | 30           | 0.7          | 3  |
|                | Tap water price per GDP per capita                                                       | USD/10 <sup>3</sup> m <sup>3</sup> /(USD/inhab) | 0.65744      | 0.44996<br>8 | 10 |
|                | Final point                                                                              | -                                               | -            | 0.53106<br>3 |    |
| <b>Greece</b>  | Water use efficiency (SDG 6.4.1.)                                                        | USD/m <sup>3</sup>                              | 15.6295<br>9 | 0.41519<br>8 | 1  |
|                | Water stress (SDG 6.4.2.)                                                                | %                                               | 20.4774<br>4 | 0.53768<br>2 | 1  |
|                | Total population with access to safe drinking water (SDG 6.1.1.)                         | %                                               | 100          | 1            | 1  |
|                | Proportion of safely treated domestic wastewater flows (SDG 6.3.1.)                      | %                                               | 92.6510<br>1 | 0.92608<br>7 | 3  |



|                      |                                                                                          |                                                 |          |          |    |
|----------------------|------------------------------------------------------------------------------------------|-------------------------------------------------|----------|----------|----|
|                      | Degree of integrated water resources management implementation (SDG 6.5.1.)              | %                                               | 86       | 0.837209 | 3  |
|                      | Proportion of hydrological basins showing high surface water extent changes (SDG 6.6.1.) | %                                               | 14       | 0.86     | 3  |
|                      | Tap water price per GDP per capita                                                       | USD/10 <sup>3</sup> m <sup>3</sup> /(USD/inhab) | 0.070652 | 0.048356 | 10 |
|                      | Final point                                                                              | -                                               | -        | 0.660647 |    |
| <b>Guinea</b>        | Water use efficiency (SDG 6.4.1.)                                                        | USD/m <sup>3</sup>                              | 10.46849 | 0.361098 | 1  |
|                      | Water stress (SDG 6.4.2.)                                                                | %                                               | 1.369231 | 0.815431 | 1  |
|                      | Total population with access to safe drinking water (SDG 6.1.1.)                         | %                                               | 76.8     | 0.545098 | 1  |
|                      | Proportion of safely treated domestic wastewater flows (SDG 6.3.1.)                      | %                                               | 8        | 0.074707 | 49 |
|                      | Degree of integrated water resources management implementation (SDG 6.5.1.)              | %                                               | 25       | 0.127907 | 3  |
|                      | Proportion of hydrological basins showing high surface water extent changes (SDG 6.6.1.) | %                                               | 21       | 0.79     | 3  |
|                      | Tap water price per GDP per capita                                                       | USD/10 <sup>3</sup> m <sup>3</sup> /(USD/inhab) | 0.016956 | 0.011605 | 50 |
|                      | Final point                                                                              | -                                               | -        | 0.389407 |    |
| <b>Guinea-Bissau</b> | Water use efficiency (SDG 6.4.1.)                                                        | USD/m <sup>3</sup>                              | 4.674147 | 0.252261 | 1  |
|                      | Water stress (SDG 6.4.2.)                                                                | %                                               | 1.495726 | 0.806358 | 1  |
|                      | Total population with access to safe drinking water (SDG 6.1.1.)                         | %                                               | 79.3     | 0.594118 | 1  |
|                      | Proportion of safely treated domestic wastewater flows (SDG 6.3.1.)                      | %                                               | 21.40018 | 0.209479 | 3  |
|                      | Degree of integrated water resources management implementation (SDG 6.5.1.)              | %                                               | 19       | 0.05814  | 3  |
|                      | Proportion of hydrological basins showing high surface water extent changes (SDG 6.6.1.) | %                                               | 73       | 0.27     | 3  |
|                      | Tap water price per GDP per capita                                                       | USD/10 <sup>3</sup> m <sup>3</sup> /(USD/inhab) | 0.46394  | 0.317532 | 51 |
|                      | Final point                                                                              | -                                               | -        | 0.35827  |    |
| <b>Guyana</b>        | Water use efficiency (SDG 6.4.1.)                                                        | USD/m <sup>3</sup>                              | 3.92499  | 0.228682 | 1  |
|                      | Water stress (SDG 6.4.2.)                                                                | %                                               | 3.298402 | 0.725159 | 1  |
|                      | Total population with access to safe drinking water (SDG 6.1.1.)                         | %                                               | 98.3     | 0.966667 | 1  |
|                      | Proportion of safely treated domestic wastewater flows (SDG 6.3.1.)                      | %                                               | 18.5     | 0.180311 | 52 |
|                      | Degree of integrated water resources management implementation (SDG 6.5.1.)              | %                                               | 19       | 0.05814  | 3  |
|                      | Proportion of hydrological basins                                                        | %                                               | 14       | 0.86     | 3  |

|                 |                                                                                          |                                                  |          |          |    |
|-----------------|------------------------------------------------------------------------------------------|--------------------------------------------------|----------|----------|----|
|                 | showing high surface water extent changes (SDG 6.6.1.)                                   |                                                  |          |          |    |
|                 | Tap water price per GDP per capita                                                       | USD/10 <sup>3</sup> m <sup>3</sup> /(USD/inh ab) | 0.073318 | 0.050181 | 53 |
|                 | Final point                                                                              | -                                                | -        | 0.438448 |    |
| <b>Haiti</b>    | Water use efficiency (SDG 6.4.1.)                                                        | USD/m <sup>3</sup>                               | 7.918479 | 0.323416 | 1  |
|                 | Water stress (SDG 6.4.2.)                                                                | %                                                | 13.38379 | 0.581348 | 1  |
|                 | Total population with access to safe drinking water (SDG 6.1.1.)                         | %                                                | 57.7     | 0.170588 | 1  |
|                 | Proportion of safely treated domestic wastewater flows (SDG 6.3.1.)                      | %                                                | 10.7     | 0.101862 | 54 |
|                 | Degree of integrated water resources management implementation (SDG 6.5.1.)              | %                                                | 30       | 0.186047 | 3  |
|                 | Proportion of hydrological basins showing high surface water extent changes (SDG 6.6.1.) | %                                                | 0        | 1        | 3  |
|                 | Tap water price per GDP per capita                                                       | USD/10 <sup>3</sup> m <sup>3</sup> /(USD/inh ab) | 0.242682 | 0.166098 | 55 |
|                 | Final point                                                                              | -                                                | -        | 0.361337 |    |
| <b>Honduras</b> | Water use efficiency (SDG 6.4.1.)                                                        | USD/m <sup>3</sup>                               | 11.7972  | 0.377227 | 1  |
|                 | Water stress (SDG 6.4.2.)                                                                | %                                                | 4.621269 | 0.690533 | 1  |
|                 | Total population with access to safe drinking water (SDG 6.1.1.)                         | %                                                | 91.2     | 0.827451 | 1  |
|                 | Proportion of safely treated domestic wastewater flows (SDG 6.3.1.)                      | %                                                | 30.2     | 0.297984 | 56 |
|                 | Degree of integrated water resources management implementation (SDG 6.5.1.)              | %                                                | 25       | 0.127907 | 3  |
|                 | Proportion of hydrological basins showing high surface water extent changes (SDG 6.6.1.) | %                                                | 25       | 0.75     | 3  |
|                 | Tap water price per GDP per capita                                                       | USD/10 <sup>3</sup> m <sup>3</sup> /(USD/inh ab) | 0.236934 | 0.162164 | 57 |
|                 | Final point                                                                              | -                                                | -        | 0.461895 |    |
| <b>Hungary</b>  | Water use efficiency (SDG 6.4.1.)                                                        | USD/m <sup>3</sup>                               | 24.46197 | 0.475662 | 1  |
|                 | Water stress (SDG 6.4.2.)                                                                | %                                                | 8.070121 | 0.63329  | 1  |
|                 | Total population with access to safe drinking water (SDG 6.1.1.)                         | %                                                | 100      | 1        | 1  |
|                 | Proportion of safely treated domestic wastewater flows (SDG 6.3.1.)                      | %                                                | 89.56422 | 0.895042 | 3  |
|                 | Degree of integrated water resources management implementation (SDG 6.5.1.)              | %                                                | 75       | 0.709302 | 3  |
|                 | Proportion of hydrological basins showing high surface water extent changes (SDG 6.6.1.) | %                                                | 0        | 1        | 3  |
|                 | Tap water price per GDP per capita                                                       | USD/10 <sup>3</sup> m <sup>3</sup> /(USD/inh ab) | 0.08370  | 0.05728  | 10 |

|                  |                                                                                          |                                                     |              |              |    |
|------------------|------------------------------------------------------------------------------------------|-----------------------------------------------------|--------------|--------------|----|
|                  |                                                                                          | ab)                                                 | 2            | 8            |    |
|                  | Final point                                                                              | -                                                   | -            | 0.68151<br>2 |    |
| <b>Iceland</b>   | Water use efficiency (SDG 6.4.1.)                                                        | USD/m <sup>3</sup>                                  | 60.1698<br>9 | 0.59715<br>1 | 1  |
|                  | Water stress (SDG 6.4.2.)                                                                | %                                                   | 0.39407<br>5 | 0.94331<br>1 | 1  |
|                  | Total population with access to safe drinking water (SDG 6.1.1.)                         | %                                                   | 100          | 1            | 1  |
|                  | Proportion of safely treated domestic wastewater flows (SDG 6.3.1.)                      | %                                                   | 73.4689<br>1 | 0.73316<br>3 | 3  |
|                  | Degree of integrated water resources management implementation (SDG 6.5.1.)              | %                                                   | 69           | 0.63953<br>5 | 3  |
|                  | Proportion of hydrological basins showing high surface water extent changes (SDG 6.6.1.) | %                                                   | 88           | 0.12         | 3  |
|                  | Tap water price per GDP per capita                                                       | USD/10 <sup>3</sup> m <sup>3</sup> /(USD/inh<br>ab) | 0.01319<br>8 | 0.00903<br>3 | 58 |
|                  | Final point                                                                              | -                                                   | -            | 0.57745<br>6 |    |
| <b>India</b>     | Water use efficiency (SDG 6.4.1.)                                                        | USD/m <sup>3</sup>                                  | 2.89131<br>9 | 0.18742<br>6 | 1  |
|                  | Water stress (SDG 6.4.2.)                                                                | %                                                   | 66.4920<br>9 | 0.41675<br>3 | 1  |
|                  | Total population with access to safe drinking water (SDG 6.1.1.)                         | %                                                   | 94.1         | 0.88431<br>4 | 1  |
|                  | Proportion of safely treated domestic wastewater flows (SDG 6.3.1.)                      | %                                                   | 26.5577<br>2 | 0.26135<br>2 | 3  |
|                  | Degree of integrated water resources management implementation (SDG 6.5.1.)              | %                                                   | 45           | 0.36046<br>5 | 3  |
|                  | Proportion of hydrological basins showing high surface water extent changes (SDG 6.6.1.) | %                                                   | 22           | 0.78         | 3  |
|                  | Tap water price per GDP per capita                                                       | USD/10 <sup>3</sup> m <sup>3</sup> /(USD/inh<br>ab) | 0.13464<br>7 | 0.09215<br>6 | 10 |
|                  | Final point                                                                              | -                                                   | -            | 0.42606<br>6 |    |
| <b>Indonesia</b> | Water use efficiency (SDG 6.4.1.)                                                        | USD/m <sup>3</sup>                                  | 4.09385<br>9 | 0.23436<br>8 | 1  |
|                  | Water stress (SDG 6.4.2.)                                                                | %                                                   | 29.6965<br>5 | 0.49951<br>6 | 1  |
|                  | Total population with access to safe drinking water (SDG 6.1.1.)                         | %                                                   | 87.4         | 0.75294<br>1 | 1  |
|                  | Proportion of safely treated domestic wastewater flows (SDG 6.3.1.)                      | %                                                   | 1            | 0.00430<br>4 | 59 |
|                  | Degree of integrated water resources management implementation (SDG 6.5.1.)              | %                                                   | 66           | 0.60465<br>1 | 3  |
|                  | Proportion of hydrological basins showing high surface water extent changes (SDG 6.6.1.) | %                                                   | 27           | 0.73         | 3  |
|                  | Tap water price per GDP per capita                                                       | USD/10 <sup>3</sup> m <sup>3</sup> /(USD/inh<br>ab) | 0.19381<br>9 | 0.13265<br>5 | 10 |
|                  | Final point                                                                              | -                                                   | -            | 0.42263<br>4 |    |

|                |                                                                                          |                                                  |              |              |    |
|----------------|------------------------------------------------------------------------------------------|--------------------------------------------------|--------------|--------------|----|
| <b>Iran</b>    | Water use efficiency (SDG 6.4.1.)                                                        | USD/m <sup>3</sup>                               | 4.02279<br>2 | 0.23200<br>5 | 1  |
|                | Water stress (SDG 6.4.2.)                                                                | %                                                | 81.2890<br>8 | 0.39612<br>2 | 1  |
|                | Total population with access to safe drinking water (SDG 6.1.1.)                         | %                                                | 96.2         | 0.92549      | 1  |
|                | Proportion of safely treated domestic wastewater flows (SDG 6.3.1.)                      | %                                                | 22.0718<br>1 | 0.21623<br>4 | 3  |
|                | Degree of integrated water resources management implementation (SDG 6.5.1.)              | %                                                | 40           | 0.30232<br>6 | 3  |
|                | Proportion of hydrological basins showing high surface water extent changes (SDG 6.6.1.) | %                                                | 43           | 0.57         | 3  |
|                | Tap water price per GDP per capita                                                       | USD/10 <sup>3</sup> m <sup>3</sup> /(USD/inh ab) | 0.00295<br>1 | 0.00202      | 60 |
|                | Final point                                                                              | -                                                | -            | 0.37774<br>2 |    |
|                |                                                                                          |                                                  |              |              |    |
| <b>Iraq</b>    | Water use efficiency (SDG 6.4.1.)                                                        | USD/m <sup>3</sup>                               | 2.98457      | 0.19171      | 1  |
|                | Water stress (SDG 6.4.2.)                                                                | %                                                | 79.5140<br>4 | 0.39838<br>9 | 1  |
|                | Total population with access to safe drinking water (SDG 6.1.1.)                         | %                                                | 86.6         | 0.73725<br>5 | 1  |
|                | Proportion of safely treated domestic wastewater flows (SDG 6.3.1.)                      | %                                                | 37.0878<br>3 | 0.36725<br>9 | 3  |
|                | Degree of integrated water resources management implementation (SDG 6.5.1.)              | %                                                | 38           | 0.27907      | 3  |
|                | Proportion of hydrological basins showing high surface water extent changes (SDG 6.6.1.) | %                                                | 20           | 0.8          | 3  |
|                | Tap water price per GDP per capita                                                       | USD/10 <sup>3</sup> m <sup>3</sup> /(USD/inh ab) | 0.00217<br>1 | 0.00148<br>6 | 61 |
|                | Final point                                                                              | -                                                | -            | 0.39645<br>3 |    |
|                |                                                                                          |                                                  |              |              |    |
| <b>Ireland</b> | Water use efficiency (SDG 6.4.1.)                                                        | USD/m <sup>3</sup>                               | 236.169<br>7 | 0.78171<br>9 | 1  |
|                | Water stress (SDG 6.4.2.)                                                                | %                                                | 21.6404<br>5 | 0.53201      | 1  |
|                | Total population with access to safe drinking water (SDG 6.1.1.)                         | %                                                | 97.9         | 0.95882<br>4 | 1  |
|                | Proportion of safely treated domestic wastewater flows (SDG 6.3.1.)                      | %                                                | 83.4170<br>5 | 0.83321<br>6 | 3  |
|                | Degree of integrated water resources management implementation (SDG 6.5.1.)              | %                                                | 81           | 0.77907      | 3  |
|                | Proportion of hydrological basins showing high surface water extent changes (SDG 6.6.1.) | %                                                | 78           | 0.22         | 3  |
|                | Tap water price per GDP per capita                                                       | USD/10 <sup>3</sup> m <sup>3</sup> /(USD/inh ab) | 0.02365<br>2 | 0.01618<br>8 | 10 |
|                | Final point                                                                              | -                                                | -            | 0.58871<br>8 |    |
|                |                                                                                          |                                                  |              |              |    |
| <b>Israel</b>  | Water use efficiency (SDG 6.4.1.)                                                        | USD/m <sup>3</sup>                               | 134.145<br>9 | 0.70537<br>2 | 1  |
|                |                                                                                          |                                                  |              |              |    |

|                |                                                                                          |                                                  |              |              |    |
|----------------|------------------------------------------------------------------------------------------|--------------------------------------------------|--------------|--------------|----|
|                | Water stress (SDG 6.4.2.)                                                                | %                                                | 110.085<br>4 | 0.36498<br>6 | 1  |
|                | Total population with access to safe drinking water (SDG 6.1.1.)                         | %                                                | 100          | 1            | 1  |
|                | Proportion of safely treated domestic wastewater flows (SDG 6.3.1.)                      | %                                                | 93.0949<br>7 | 0.93055<br>2 | 3  |
|                | Degree of integrated water resources management implementation (SDG 6.5.1.)              | %                                                | 85           | 0.82558<br>1 | 3  |
|                | Proportion of hydrological basins showing high surface water extent changes (SDG 6.6.1.) | %                                                | 8            | 0.92         | 3  |
|                | Tap water price per GDP per capita                                                       | USD/10 <sup>3</sup> m <sup>3</sup> /(USD/inh ab) | 0.06357<br>2 | 0.04351      | 10 |
|                | Final point                                                                              | -                                                | -            | 0.68428<br>6 |    |
| <b>Italy</b>   | Water use efficiency (SDG 6.4.1.)                                                        | USD/m <sup>3</sup>                               | 45.8802<br>4 | 0.56055<br>3 | 1  |
|                | Water stress (SDG 6.4.2.)                                                                | %                                                | 29.6457<br>8 | 0.49969<br>2 | 1  |
|                | Total population with access to safe drinking water (SDG 6.1.1.)                         | %                                                | 100          | 1            | 1  |
|                | Proportion of safely treated domestic wastewater flows (SDG 6.3.1.)                      | %                                                | 94.7405<br>6 | 0.94710<br>3 | 3  |
|                | Degree of integrated water resources management implementation (SDG 6.5.1.)              | %                                                | 77           | 0.73255<br>8 | 3  |
|                | Proportion of hydrological basins showing high surface water extent changes (SDG 6.6.1.) | %                                                | 8            | 0.92         | 3  |
|                | Tap water price per GDP per capita                                                       | USD/10 <sup>3</sup> m <sup>3</sup> /(USD/inh ab) | 0.04097<br>6 | 0.02804<br>5 | 10 |
|                | Final point                                                                              | -                                                | -            | 0.66970<br>7 |    |
| <b>Jamaica</b> | Water use efficiency (SDG 6.4.1.)                                                        | USD/m <sup>3</sup>                               | 8.11532      | 0.32673      | 1  |
|                | Water stress (SDG 6.4.2.)                                                                | %                                                | 12.4734<br>4 | 0.58858<br>1 | 1  |
|                | Total population with access to safe drinking water (SDG 6.1.1.)                         | %                                                | 93.8         | 0.87843<br>1 | 1  |
|                | Proportion of safely treated domestic wastewater flows (SDG 6.3.1.)                      | %                                                | 13.7         | 0.13203<br>5 | 62 |
|                | Degree of integrated water resources management implementation (SDG 6.5.1.)              | %                                                | 50           | 0.41860<br>5 | 3  |
|                | Proportion of hydrological basins showing high surface water extent changes (SDG 6.6.1.) | %                                                | 0            | 1            | 3  |
|                | Tap water price per GDP per capita                                                       | USD/10 <sup>3</sup> m <sup>3</sup> /(USD/inh ab) | 0.36874<br>1 | 0.25237<br>6 | 63 |
|                | Final point                                                                              | -                                                | -            | 0.51382<br>3 |    |
| <b>Japan</b>   | Water use efficiency (SDG 6.4.1.)                                                        | USD/m <sup>3</sup>                               | 55.4168<br>5 | 0.58604<br>4 | 1  |
|                | Water stress (SDG 6.4.2.)                                                                | %                                                | 36.0459<br>8 | 0.47962<br>1 | 1  |
|                | Total population with access to safe drinking water (SDG 6.1.1.)                         | %                                                | 100          | 1            | 1  |

|                   |                                                                                          |                                                  |              |              |    |
|-------------------|------------------------------------------------------------------------------------------|--------------------------------------------------|--------------|--------------|----|
|                   | Proportion of safely treated domestic wastewater flows (SDG 6.3.1.)                      | %                                                | 97.8172<br>2 | 0.97804<br>7 | 3  |
|                   | Degree of integrated water resources management implementation (SDG 6.5.1.)              | %                                                | 95           | 0.94186      | 3  |
|                   | Proportion of hydrological basins showing high surface water extent changes (SDG 6.6.1.) | %                                                | 3            | 0.97         | 3  |
|                   | Tap water price per GDP per capita                                                       | USD/10 <sup>3</sup> m <sup>3</sup> /(USD/inh ab) | 0.04351<br>1 | 0.02978      | 10 |
|                   | Final point                                                                              | -                                                | -            | 0.71219<br>3 |    |
| <b>Jordan</b>     | Water use efficiency (SDG 6.4.1.)                                                        | USD/m <sup>3</sup>                               | 32.5849<br>9 | 0.51436<br>5 | 1  |
|                   | Water stress (SDG 6.4.2.)                                                                | %                                                | 104.312<br>8 | 0.37051<br>7 | 1  |
|                   | Total population with access to safe drinking water (SDG 6.1.1.)                         | %                                                | 96.9         | 0.93921<br>6 | 1  |
|                   | Proportion of safely treated domestic wastewater flows (SDG 6.3.1.)                      | %                                                | 81.9964<br>1 | 0.81892<br>8 | 3  |
|                   | Degree of integrated water resources management implementation (SDG 6.5.1.)              | %                                                | 64           | 0.58139<br>5 | 3  |
|                   | Proportion of hydrological basins showing high surface water extent changes (SDG 6.6.1.) | %                                                | 35           | 0.65         | 3  |
|                   | Tap water price per GDP per capita                                                       | USD/10 <sup>3</sup> m <sup>3</sup> /(USD/inh ab) | 0.24050<br>1 | 0.16460<br>5 | 10 |
|                   | Final point                                                                              | -                                                | -            | 0.57700<br>4 |    |
| <b>Kazakhstan</b> | Water use efficiency (SDG 6.4.1.)                                                        | USD/m <sup>3</sup>                               | 7.42306<br>2 | 0.31469<br>5 | 1  |
|                   | Water stress (SDG 6.4.2.)                                                                | %                                                | 34.0984<br>7 | 0.48532<br>4 | 1  |
|                   | Total population with access to safe drinking water (SDG 6.1.1.)                         | %                                                | 92.9         | 0.86078<br>4 | 1  |
|                   | Proportion of safely treated domestic wastewater flows (SDG 6.3.1.)                      | %                                                | 35.6698<br>2 | 0.35299<br>7 | 3  |
|                   | Degree of integrated water resources management implementation (SDG 6.5.1.)              | %                                                | 46           | 0.37209<br>3 | 3  |
|                   | Proportion of hydrological basins showing high surface water extent changes (SDG 6.6.1.) | %                                                | 33           | 0.67         | 3  |
|                   | Tap water price per GDP per capita                                                       | USD/10 <sup>3</sup> m <sup>3</sup> /(USD/inh ab) | 0.01426<br>8 | 0.00976<br>5 | 64 |
|                   | Final point                                                                              | -                                                | -            | 0.43795<br>1 |    |
| <b>Kuwait</b>     | Water use efficiency (SDG 6.4.1.)                                                        | USD/m <sup>3</sup>                               | 95.9473<br>7 | 0.66013<br>6 | 1  |
|                   | Water stress (SDG 6.4.2.)                                                                | %                                                | 3850.5       | 0            | 1  |
|                   | Total population with access to safe drinking water (SDG 6.1.1.)                         | %                                                | 99           | 0.98039<br>2 | 1  |
|                   | Proportion of safely treated domestic wastewater flows (SDG 6.3.1.)                      | %                                                | 84.7         | 0.84612      | 3  |
|                   | Degree of integrated water resources management implementation (SDG 6.5.1.)              | %                                                | 94           | 0.93023<br>3 | 3  |

|                   |                                                                                          |                                                 |          |          |    |
|-------------------|------------------------------------------------------------------------------------------|-------------------------------------------------|----------|----------|----|
|                   | 6.5.1.)                                                                                  |                                                 |          |          |    |
|                   | Proportion of hydrological basins showing high surface water extent changes (SDG 6.6.1.) | %                                               | 60       | 0.4      | 3  |
|                   | Tap water price per GDP per capita                                                       | USD/10 <sup>3</sup> m <sup>3</sup> /(USD/inhab) | 0.031037 | 0.021243 | 10 |
|                   | Final point                                                                              | -                                               | -        | 0.548303 |    |
| <b>Kyrgyzstan</b> | Water use efficiency (SDG 6.4.1.)                                                        | USD/m <sup>3</sup>                              | 0.855292 | 0.023017 | 1  |
|                   | Water stress (SDG 6.4.2.)                                                                | %                                               | 50.03896 | 0.445942 | 1  |
|                   | Total population with access to safe drinking water (SDG 6.1.1.)                         | %                                               | 90       | 0.803922 | 1  |
|                   | Proportion of safely treated domestic wastewater flows (SDG 6.3.1.)                      | %                                               | 18.89341 | 0.184267 | 3  |
|                   | Degree of integrated water resources management implementation (SDG 6.5.1.)              | %                                               | 31       | 0.197674 | 3  |
|                   | Proportion of hydrological basins showing high surface water extent changes (SDG 6.6.1.) | %                                               | 24       | 0.76     | 3  |
|                   | Tap water price per GDP per capita                                                       | USD/10 <sup>3</sup> m <sup>3</sup> /(USD/inhab) | 0.052288 | 0.035788 | 65 |
|                   | Final point                                                                              | -                                               | -        | 0.350087 |    |
| <b>Laos</b>       | Water use efficiency (SDG 6.4.1.)                                                        | USD/m <sup>3</sup>                              | 2.050918 | 0.14107  | 1  |
|                   | Water stress (SDG 6.4.2.)                                                                | %                                               | 4.791395 | 0.686821 | 1  |
|                   | Total population with access to safe drinking water (SDG 6.1.1.)                         | %                                               | 75.7     | 0.523529 | 1  |
|                   | Proportion of safely treated domestic wastewater flows (SDG 6.3.1.)                      | %                                               | 10.09606 | 0.095788 | 3  |
|                   | Degree of integrated water resources management implementation (SDG 6.5.1.)              | %                                               | 62       | 0.55814  | 3  |
|                   | Proportion of hydrological basins showing high surface water extent changes (SDG 6.6.1.) | %                                               | 30       | 0.7      | 3  |
|                   | Tap water price per GDP per capita                                                       | USD/10 <sup>3</sup> m <sup>3</sup> /(USD/inhab) | 0.049566 | 0.033924 | 66 |
|                   | Final point                                                                              | -                                               | -        | 0.391325 |    |
| <b>Latvia</b>     | Water use efficiency (SDG 6.4.1.)                                                        | USD/m <sup>3</sup>                              | 135.5935 | 0.70682  | 1  |
|                   | Water stress (SDG 6.4.2.)                                                                | %                                               | 1.067831 | 0.840959 | 1  |
|                   | Total population with access to safe drinking water (SDG 6.1.1.)                         | %                                               | 99.3     | 0.986275 | 1  |
|                   | Proportion of safely treated domestic wastewater flows (SDG 6.3.1.)                      | %                                               | 93.14523 | 0.931058 | 3  |
|                   | Degree of integrated water resources management implementation (SDG 6.5.1.)              | %                                               | 62       | 0.55814  | 3  |
|                   | Proportion of hydrological basins showing high surface water extent                      | %                                               | 0        | 1        | 3  |

|                |                                                                                          |                                                  |              |              |    |
|----------------|------------------------------------------------------------------------------------------|--------------------------------------------------|--------------|--------------|----|
|                | changes (SDG 6.6.1.)                                                                     |                                                  |              |              |    |
|                | Tap water price per GDP per capita                                                       | USD/10 <sup>3</sup> m <sup>3</sup> /(USD/inh ab) | 0.07386<br>5 | 0.05055<br>5 | 67 |
|                | Final point                                                                              | -                                                | -            | 0.72482<br>9 |    |
| <b>Lebanon</b> | Water use efficiency (SDG 6.4.1.)                                                        | USD/m <sup>3</sup>                               | 18.3096<br>5 | 0.43656      | 1  |
|                | Water stress (SDG 6.4.2.)                                                                | %                                                | 58.7929<br>9 | 0.42938<br>9 | 1  |
|                | Total population with access to safe drinking water (SDG 6.1.1.)                         | %                                                | 99           | 0.98039<br>2 | 1  |
|                | Proportion of safely treated domestic wastewater flows (SDG 6.3.1.)                      | %                                                | 45.7         | 0.45387<br>6 | 68 |
|                | Degree of integrated water resources management implementation (SDG 6.5.1.)              | %                                                | 25           | 0.12790<br>7 | 3  |
|                | Proportion of hydrological basins showing high surface water extent changes (SDG 6.6.1.) | %                                                | 25           | 0.75         | 3  |
|                | Tap water price per GDP per capita                                                       | USD/10 <sup>3</sup> m <sup>3</sup> /(USD/inh ab) | 0.02577<br>8 | 0.01764<br>3 | 10 |
|                | Final point                                                                              | -                                                | -            | 0.45653<br>8 |    |
| <b>Lesotho</b> | Water use efficiency (SDG 6.4.1.)                                                        | USD/m <sup>3</sup>                               | 43.3994<br>6 | 0.55305      | 1  |
|                | Water stress (SDG 6.4.2.)                                                                | %                                                | 2.56590<br>5 | 0.75094<br>4 | 1  |
|                | Total population with access to safe drinking water (SDG 6.1.1.)                         | %                                                | 81.8         | 0.64313<br>7 | 1  |
|                | Proportion of safely treated domestic wastewater flows (SDG 6.3.1.)                      | %                                                | 2.3          | 0.01737<br>9 | 69 |
|                | Degree of integrated water resources management implementation (SDG 6.5.1.)              | %                                                | 45           | 0.36046<br>5 | 3  |
|                | Proportion of hydrological basins showing high surface water extent changes (SDG 6.6.1.) | %                                                | 20           | 0.8          | 3  |
|                | Tap water price per GDP per capita                                                       | USD/10 <sup>3</sup> m <sup>3</sup> /(USD/inh ab) | 0.91400<br>3 | 0.62556<br>7 | 70 |
|                | Final point                                                                              | -                                                | -            | 0.53579<br>2 |    |
| <b>Liberia</b> | Water use efficiency (SDG 6.4.1.)                                                        | USD/m <sup>3</sup>                               | 4.26510<br>1 | 0.23989<br>9 | 1  |
|                | Water stress (SDG 6.4.2.)                                                                | %                                                | 0.26431<br>2 | 0.98432<br>2 | 1  |
|                | Total population with access to safe drinking water (SDG 6.1.1.)                         | %                                                | 75.6         | 0.52156<br>9 | 1  |
|                | Proportion of safely treated domestic wastewater flows (SDG 6.3.1.)                      | %                                                | 14.3         | 0.13806<br>9 | 71 |
|                | Degree of integrated water resources management implementation (SDG 6.5.1.)              | %                                                | 15           | 0.01162<br>8 | 3  |
|                | Proportion of hydrological basins showing high surface water extent changes (SDG 6.6.1.) | %                                                | 50           | 0.5          | 3  |
|                | Tap water price per GDP per capita                                                       | USD/10 <sup>3</sup> m <sup>3</sup> /(USD/inh ab) | 0.83584<br>9 | 0.57207<br>6 | 72 |



|                   |                                                                                          |                                                     |              |              |     |
|-------------------|------------------------------------------------------------------------------------------|-----------------------------------------------------|--------------|--------------|-----|
|                   | Final point                                                                              | -                                                   | -            | 0.42393<br>8 |     |
| <b>Libya</b>      | Water use efficiency (SDG 6.4.1.)                                                        | USD/m <sup>3</sup>                                  | 3.52862<br>8 | 0.21431<br>3 | 1   |
|                   | Water stress (SDG 6.4.2.)                                                                | %                                                   | 817.142<br>9 | 0.15916<br>4 | 1   |
|                   | Total population with access to safe drinking water (SDG 6.1.1.)                         | %                                                   | 71.2         | 0.43529<br>4 | 1   |
|                   | Proportion of safely treated domestic wastewater flows (SDG 6.3.1.)                      | %                                                   | 16.6324<br>2 | 0.16152<br>7 | 3   |
|                   | Degree of integrated water resources management implementation (SDG 6.5.1.)              | %                                                   | 60           | 0.53488<br>4 | 3   |
|                   | Proportion of hydrological basins showing high surface water extent changes (SDG 6.6.1.) | %                                                   | 10           | 0.9          | 3   |
|                   | Tap water price per GDP per capita                                                       | USD/10 <sup>3</sup> m <sup>3</sup> /(USD/inh<br>ab) | 0.03535<br>4 | 0.02419<br>7 | 106 |
|                   | Final point                                                                              | -                                                   | -            | 0.34705<br>4 |     |
| <b>Lithuania</b>  | Water use efficiency (SDG 6.4.1.)                                                        | USD/m <sup>3</sup>                                  | 163.693<br>5 | 0.73224<br>2 | 1   |
|                   | Water stress (SDG 6.4.2.)                                                                | %                                                   | 1.83410<br>2 | 0.78541<br>8 | 1   |
|                   | Total population with access to safe drinking water (SDG 6.1.1.)                         | %                                                   | 96.6         | 0.93333<br>3 | 1   |
|                   | Proportion of safely treated domestic wastewater flows (SDG 6.3.1.)                      | %                                                   | 93.3528<br>1 | 0.93314<br>6 | 3   |
|                   | Degree of integrated water resources management implementation (SDG 6.5.1.)              | %                                                   | 61           | 0.54651<br>2 | 3   |
|                   | Proportion of hydrological basins showing high surface water extent changes (SDG 6.6.1.) | %                                                   | 0            | 1            | 3   |
|                   | Tap water price per GDP per capita                                                       | USD/10 <sup>3</sup> m <sup>3</sup> /(USD/inh<br>ab) | 0.03129<br>2 | 0.02141<br>7 | 73  |
|                   | Final point                                                                              | -                                                   | -            | 0.70743<br>8 |     |
| <b>Luxembourg</b> | Water use efficiency (SDG 6.4.1.)                                                        | USD/m <sup>3</sup>                                  | 1189.97<br>7 | 1            | 1   |
|                   | Water stress (SDG 6.4.2.)                                                                | %                                                   | 3.96351<br>6 | 0.70629<br>7 | 1   |
|                   | Total population with access to safe drinking water (SDG 6.1.1.)                         | %                                                   | 100          | 1            | 1   |
|                   | Proportion of safely treated domestic wastewater flows (SDG 6.3.1.)                      | %                                                   | 96.3482<br>5 | 0.96327<br>2 | 3   |
|                   | Degree of integrated water resources management implementation (SDG 6.5.1.)              | %                                                   | 89           | 0.87209<br>3 | 3   |
|                   | Proportion of hydrological basins showing high surface water extent changes (SDG 6.6.1.) | %                                                   | 0            | 1            | 3   |
|                   | Tap water price per GDP per capita                                                       | USD/10 <sup>3</sup> m <sup>3</sup> /(USD/inh<br>ab) | 0.02116<br>4 | 0.01448<br>5 | 74  |
|                   | Final point                                                                              | -                                                   | -            | 0.79373<br>5 |     |

|                   |                                                                                          |                                                     |              |              |    |
|-------------------|------------------------------------------------------------------------------------------|-----------------------------------------------------|--------------|--------------|----|
| <b>Madagascar</b> | Water use efficiency (SDG 6.4.1.)                                                        | USD/m <sup>3</sup>                                  | 0.72120<br>3 | 1.04E-<br>16 | 1  |
|                   | Water stress (SDG 6.4.2.)                                                                | %                                                   | 11.2615<br>1 | 0.59907<br>6 | 1  |
|                   | Total population with access to safe drinking water (SDG 6.1.1.)                         | %                                                   | 51.5         | 0.04902      | 1  |
|                   | Proportion of safely treated domestic wastewater flows (SDG 6.3.1.)                      | %                                                   | 9.30359      | 0.08781<br>7 | 3  |
|                   | Degree of integrated water resources management implementation (SDG 6.5.1.)              | %                                                   | 38           | 0.27907      | 3  |
|                   | Proportion of hydrological basins showing high surface water extent changes (SDG 6.6.1.) | %                                                   | 8            | 0.92         | 3  |
|                   | Tap water price per GDP per capita                                                       | USD/10 <sup>3</sup> m <sup>3</sup> /(USD/inh<br>ab) | 0.68119      | 0.46622<br>4 | 75 |
|                   | Final point                                                                              | -                                                   | -            | 0.34302<br>9 |    |
|                   |                                                                                          |                                                     |              |              |    |
| <b>Malawi</b>     | Water use efficiency (SDG 6.4.1.)                                                        | USD/m <sup>3</sup>                                  | 5.60028<br>8 | 0.27666<br>1 | 1  |
|                   | Water stress (SDG 6.4.2.)                                                                | %                                                   | 17.5048<br>4 | 0.55378<br>7 | 1  |
|                   | Total population with access to safe drinking water (SDG 6.1.1.)                         | %                                                   | 90.2         | 0.80784<br>3 | 1  |
|                   | Proportion of safely treated domestic wastewater flows (SDG 6.3.1.)                      | %                                                   | 6.47575      | 0.05937<br>6 | 3  |
|                   | Degree of integrated water resources management implementation (SDG 6.5.1.)              | %                                                   | 55           | 0.47674<br>4 | 3  |
|                   | Proportion of hydrological basins showing high surface water extent changes (SDG 6.6.1.) | %                                                   | 15           | 0.85         | 3  |
|                   | Tap water price per GDP per capita                                                       | USD/10 <sup>3</sup> m <sup>3</sup> /(USD/inh<br>ab) | 1.13845<br>6 | 0.77918<br>8 | 44 |
|                   | Final point                                                                              | -                                                   | -            | 0.54337<br>1 |    |
|                   |                                                                                          |                                                     |              |              |    |
| <b>Malaysia</b>   | Water use efficiency (SDG 6.4.1.)                                                        | USD/m <sup>3</sup>                                  | 57.3390<br>6 | 0.59064<br>6 | 1  |
|                   | Water stress (SDG 6.4.2.)                                                                | %                                                   | 3.43948<br>7 | 0.72085<br>8 | 1  |
|                   | Total population with access to safe drinking water (SDG 6.1.1.)                         | %                                                   | 98.2         | 0.96470<br>6 | 1  |
|                   | Proportion of safely treated domestic wastewater flows (SDG 6.3.1.)                      | %                                                   | 87.8246      | 0.87754<br>5 | 3  |
|                   | Degree of integrated water resources management implementation (SDG 6.5.1.)              | %                                                   | 63           | 0.56976<br>7 | 3  |
|                   | Proportion of hydrological basins showing high surface water extent changes (SDG 6.6.1.) | %                                                   | 15           | 0.85         | 3  |
|                   | Tap water price per GDP per capita                                                       | USD/10 <sup>3</sup> m <sup>3</sup> /(USD/inh<br>ab) | 0.02115      | 0.01447<br>6 | 10 |
|                   | Final point                                                                              | -                                                   | -            | 0.65542<br>8 |    |
|                   |                                                                                          |                                                     |              |              |    |
| <b>Malta</b>      | Water use efficiency (SDG 6.4.1.)                                                        | USD/m <sup>3</sup>                                  | 185.854      | 0.74938      | 1  |
|                   | Water stress (SDG 6.4.2.)                                                                | %                                                   | 81.8599<br>4 | 0.39540<br>4 | 1  |

|                   |                                                                                          |                                                  |              |              |    |
|-------------------|------------------------------------------------------------------------------------------|--------------------------------------------------|--------------|--------------|----|
|                   | Total population with access to safe drinking water (SDG 6.1.1.)                         | %                                                | 100          | 1            | 1  |
|                   | Proportion of safely treated domestic wastewater flows (SDG 6.3.1.)                      | %                                                | 15.3563<br>1 | 0.14869<br>3 | 3  |
|                   | Degree of integrated water resources management implementation (SDG 6.5.1.)              | %                                                | 86           | 0.83720<br>9 | 3  |
|                   | Proportion of hydrological basins showing high surface water extent changes (SDG 6.6.1.) | %                                                | 100          | 0            | 3  |
|                   | Tap water price per GDP per capita                                                       | USD/10 <sup>3</sup> m <sup>3</sup> /(USD/inh ab) | 0.04560<br>2 | 0.03121<br>1 | 76 |
|                   | Final point                                                                              | -                                                | -            | 0.4517       |    |
| <b>Mauritania</b> | Water use efficiency (SDG 6.4.1.)                                                        | USD/m <sup>3</sup>                               | 3.90575<br>9 | 0.22801<br>9 | 1  |
|                   | Water stress (SDG 6.4.2.)                                                                | %                                                | 13.2462<br>2 | 0.58240<br>9 | 1  |
|                   | Total population with access to safe drinking water (SDG 6.1.1.)                         | %                                                | 57.9         | 0.17451      | 1  |
|                   | Proportion of safely treated domestic wastewater flows (SDG 6.3.1.)                      | %                                                | 12.3         | 0.11795<br>4 | 77 |
|                   | Degree of integrated water resources management implementation (SDG 6.5.1.)              | %                                                | 47           | 0.38372<br>1 | 3  |
|                   | Proportion of hydrological basins showing high surface water extent changes (SDG 6.6.1.) | %                                                | 10           | 0.9          | 3  |
|                   | Tap water price per GDP per capita                                                       | USD/10 <sup>3</sup> m <sup>3</sup> /(USD/inh ab) | 0.36417<br>3 | 0.24924<br>9 | 78 |
|                   | Final point                                                                              | -                                                | -            | 0.37655<br>2 |    |
| <b>Mexico</b>     | Water use efficiency (SDG 6.4.1.)                                                        | USD/m <sup>3</sup>                               | 11.8985<br>2 | 0.37838<br>2 | 1  |
|                   | Water stress (SDG 6.4.2.)                                                                | %                                                | 44.8170<br>2 | 0.45725<br>9 | 1  |
|                   | Total population with access to safe drinking water (SDG 6.1.1.)                         | %                                                | 96.1         | 0.92352<br>9 | 1  |
|                   | Proportion of safely treated domestic wastewater flows (SDG 6.3.1.)                      | %                                                | 60.0931<br>3 | 0.59863<br>5 | 3  |
|                   | Degree of integrated water resources management implementation (SDG 6.5.1.)              | %                                                | 42           | 0.32558<br>1 | 3  |
|                   | Proportion of hydrological basins showing high surface water extent changes (SDG 6.6.1.) | %                                                | 24           | 0.76         | 3  |
|                   | Tap water price per GDP per capita                                                       | USD/10 <sup>3</sup> m <sup>3</sup> /(USD/inh ab) | 0.14533<br>5 | 0.09947<br>1 | 10 |
|                   | Final point                                                                              | -                                                | -            | 0.50612<br>3 |    |
| <b>Moldova</b>    | Water use efficiency (SDG 6.4.1.)                                                        | USD/m <sup>3</sup>                               | 8.44651<br>1 | 0.33212<br>9 | 1  |
|                   | Water stress (SDG 6.4.2.)                                                                | %                                                | 12.5631<br>1 | 0.58784<br>6 | 1  |
|                   | Total population with access to safe drinking water (SDG 6.1.1.)                         | %                                                | 88.4         | 0.77254<br>9 | 1  |
|                   | Proportion of safely treated domestic wastewater flows (SDG 6.3.1.)                      | %                                                | 38.4944<br>2 | 0.38140<br>5 | 3  |

|                   |                                                                                          |                                                 |          |          |    |
|-------------------|------------------------------------------------------------------------------------------|-------------------------------------------------|----------|----------|----|
|                   | Degree of integrated water resources management implementation (SDG 6.5.1.)              | %                                               | 46       | 0.372093 | 3  |
|                   | Proportion of hydrological basins showing high surface water extent changes (SDG 6.6.1.) | %                                               | 0        | 1        | 3  |
|                   | Tap water price per GDP per capita                                                       | USD/10 <sup>3</sup> m <sup>3</sup> /(USD/inhab) | 0.316572 | 0.21667  | 79 |
|                   | Final point                                                                              | -                                               | -        | 0.523242 |    |
| <b>Mongolia</b>   | Water use efficiency (SDG 6.4.1.)                                                        | USD/m <sup>3</sup>                              | 22.85467 | 0.466488 | 1  |
|                   | Water stress (SDG 6.4.2.)                                                                | %                                               | 3.395007 | 0.722195 | 1  |
|                   | Total population with access to safe drinking water (SDG 6.1.1.)                         | %                                               | 64.4     | 0.301961 | 1  |
|                   | Proportion of safely treated domestic wastewater flows (SDG 6.3.1.)                      | %                                               | 10.43006 | 0.099147 | 3  |
|                   | Degree of integrated water resources management implementation (SDG 6.5.1.)              | %                                               | 45       | 0.360465 | 3  |
|                   | Proportion of hydrological basins showing high surface water extent changes (SDG 6.6.1.) | %                                               | 20       | 0.8      | 3  |
|                   | Tap water price per GDP per capita                                                       | USD/10 <sup>3</sup> m <sup>3</sup> /(USD/inhab) | 0.097322 | 0.06661  | 80 |
|                   | Final point                                                                              | -                                               | -        | 0.402409 |    |
| <b>Morocco</b>    | Water use efficiency (SDG 6.4.1.)                                                        | USD/m <sup>3</sup>                              | 8.707182 | 0.336232 | 1  |
|                   | Water stress (SDG 6.4.2.)                                                                | %                                               | 50.75121 | 0.444491 | 1  |
|                   | Total population with access to safe drinking water (SDG 6.1.1.)                         | %                                               | 85.4     | 0.713725 | 1  |
|                   | Proportion of safely treated domestic wastewater flows (SDG 6.3.1.)                      | %                                               | 36.14309 | 0.357757 | 3  |
|                   | Degree of integrated water resources management implementation (SDG 6.5.1.)              | %                                               | 71       | 0.662791 | 3  |
|                   | Proportion of hydrological basins showing high surface water extent changes (SDG 6.6.1.) | %                                               | 30       | 0.7      | 3  |
|                   | Tap water price per GDP per capita                                                       | USD/10 <sup>3</sup> m <sup>3</sup> /(USD/inhab) | 0.353905 | 0.242222 | 10 |
|                   | Final point                                                                              | -                                               | -        | 0.493888 |    |
| <b>Mozambique</b> | Water use efficiency (SDG 6.4.1.)                                                        | USD/m <sup>3</sup>                              | 7.759052 | 0.32067  | 1  |
|                   | Water stress (SDG 6.4.2.)                                                                | %                                               | 1.751486 | 0.79015  | 1  |
|                   | Total population with access to safe drinking water (SDG 6.1.1.)                         | %                                               | 51.1     | 0.041176 | 1  |
|                   | Proportion of safely treated domestic wastewater flows (SDG 6.3.1.)                      | %                                               | 6.7      | 0.061632 | 81 |
|                   | Degree of integrated water resources management implementation (SDG 6.5.1.)              | %                                               | 62       | 0.55814  | 3  |

|                    |                                                                                          |                                                  |          |          |    |
|--------------------|------------------------------------------------------------------------------------------|--------------------------------------------------|----------|----------|----|
|                    | Proportion of hydrological basins showing high surface water extent changes (SDG 6.6.1.) | %                                                | 24       | 0.76     | 3  |
|                    | Tap water price per GDP per capita                                                       | USD/10 <sup>3</sup> m <sup>3</sup> /(USD/inh ab) | 0.196059 | 0.134188 | 82 |
|                    | Final point                                                                              | -                                                | -        | 0.380851 |    |
| <b>Namibia</b>     | Water use efficiency (SDG 6.4.1.)                                                        | USD/m <sup>3</sup>                               | 30.49435 | 0.505415 | 1  |
|                    | Water stress (SDG 6.4.2.)                                                                | %                                                | 0.861553 | 0.862998 | 1  |
|                    | Total population with access to safe drinking water (SDG 6.1.1.)                         | %                                                | 91       | 0.823529 | 1  |
|                    | Proportion of safely treated domestic wastewater flows (SDG 6.3.1.)                      | %                                                | 26.3     | 0.25876  | 83 |
|                    | Degree of integrated water resources management implementation (SDG 6.5.1.)              | %                                                | 53       | 0.453488 | 3  |
|                    | Proportion of hydrological basins showing high surface water extent changes (SDG 6.6.1.) | %                                                | 24       | 0.76     | 3  |
|                    | Tap water price per GDP per capita                                                       | USD/10 <sup>3</sup> m <sup>3</sup> /(USD/inh ab) | 0.752046 | 0.514719 | 44 |
|                    | Final point                                                                              | -                                                | -        | 0.596987 |    |
| <b>Nepal</b>       | Water use efficiency (SDG 6.4.1.)                                                        | USD/m <sup>3</sup>                               | 2.640405 | 0.175172 | 1  |
|                    | Water stress (SDG 6.4.2.)                                                                | %                                                | 8.311833 | 0.63026  | 1  |
|                    | Total population with access to safe drinking water (SDG 6.1.1.)                         | %                                                | 91.6     | 0.835294 | 1  |
|                    | Proportion of safely treated domestic wastewater flows (SDG 6.3.1.)                      | %                                                | 37.20054 | 0.368392 | 3  |
|                    | Degree of integrated water resources management implementation (SDG 6.5.1.)              | %                                                | 37       | 0.267442 | 3  |
|                    | Proportion of hydrological basins showing high surface water extent changes (SDG 6.6.1.) | %                                                | 17       | 0.83     | 3  |
|                    | Tap water price per GDP per capita                                                       | USD/10 <sup>3</sup> m <sup>3</sup> /(USD/inh ab) | 0.1057   | 0.072344 | 84 |
|                    | Final point                                                                              | -                                                | -        | 0.454129 |    |
| <b>Netherlands</b> | Water use efficiency (SDG 6.4.1.)                                                        | USD/m <sup>3</sup>                               | 85.97548 | 0.645324 | 1  |
|                    | Water stress (SDG 6.4.2.)                                                                | %                                                | 16.80356 | 0.557985 | 1  |
|                    | Total population with access to safe drinking water (SDG 6.1.1.)                         | %                                                | 100      | 1        | 1  |
|                    | Proportion of safely treated domestic wastewater flows (SDG 6.3.1.)                      | %                                                | 99.81056 | 0.998095 | 3  |
|                    | Degree of integrated water resources management implementation (SDG 6.5.1.)              | %                                                | 92       | 0.906977 | 3  |
|                    | Proportion of hydrological basins showing high surface water extent changes (SDG 6.6.1.) | %                                                | 0        | 1        | 3  |

|                    |                                                                                          |                                                  |          |          |     |
|--------------------|------------------------------------------------------------------------------------------|--------------------------------------------------|----------|----------|-----|
|                    | Tap water price per GDP per capita                                                       | USD/10 <sup>3</sup> m <sup>3</sup> /(USD/inh ab) | 0.07875  | 0.053898 | 10  |
|                    | Final point                                                                              | -                                                | -        | 0.737468 |     |
| <b>New Zealand</b> | Water use efficiency (SDG 6.4.1.)                                                        | USD/m <sup>3</sup>                               | 38.68756 | 0.537537 | 1   |
|                    | Water stress (SDG 6.4.2.)                                                                | %                                                | 8.048085 | 0.633571 | 1   |
|                    | Total population with access to safe drinking water (SDG 6.1.1.)                         | %                                                | 100      | 1        | 1   |
|                    | Proportion of safely treated domestic wastewater flows (SDG 6.3.1.)                      | %                                                | 85.14296 | 0.850575 | 3   |
|                    | Degree of integrated water resources management implementation (SDG 6.5.1.)              | %                                                | 65       | 0.593023 | 3   |
|                    | Proportion of hydrological basins showing high surface water extent changes (SDG 6.6.1.) | %                                                | 5        | 0.95     | 3   |
|                    | Tap water price per GDP per capita                                                       | USD/10 <sup>3</sup> m <sup>3</sup> /(USD/inh ab) | 0.030929 | 0.021168 | 10  |
|                    | Final point                                                                              | -                                                | -        | 0.655125 |     |
|                    |                                                                                          |                                                  |          |          |     |
| <b>Niger</b>       | Water use efficiency (SDG 6.4.1.)                                                        | USD/m <sup>3</sup>                               | 2.759023 | 0.181104 | 1   |
|                    | Water stress (SDG 6.4.2.)                                                                | %                                                | 11.02094 | 0.601293 | 1   |
|                    | Total population with access to safe drinking water (SDG 6.1.1.)                         | %                                                | 58.2     | 0.180392 | 1   |
|                    | Proportion of safely treated domestic wastewater flows (SDG 6.3.1.)                      | %                                                | 4.00021  | 0.034479 | 3   |
|                    | Degree of integrated water resources management implementation (SDG 6.5.1.)              | %                                                | 53       | 0.453488 | 3   |
|                    | Proportion of hydrological basins showing high surface water extent changes (SDG 6.6.1.) | %                                                | 7        | 0.93     | 3   |
|                    | Tap water price per GDP per capita                                                       | USD/10 <sup>3</sup> m <sup>3</sup> /(USD/inh ab) | 1.22078  | 0.835533 | 107 |
|                    | Final point                                                                              | -                                                | -        | 0.45947  |     |
|                    |                                                                                          |                                                  |          |          |     |
| <b>Nigeria</b>     | Water use efficiency (SDG 6.4.1.)                                                        | USD/m <sup>3</sup>                               | 30.12267 | 0.503759 | 1   |
|                    | Water stress (SDG 6.4.2.)                                                                | %                                                | 9.668217 | 0.614739 | 1   |
|                    | Total population with access to safe drinking water (SDG 6.1.1.)                         | %                                                | 68.5     | 0.382353 | 1   |
|                    | Proportion of safely treated domestic wastewater flows (SDG 6.3.1.)                      | %                                                | 48.2916  | 0.479941 | 3   |
|                    | Degree of integrated water resources management implementation (SDG 6.5.1.)              | %                                                | 44       | 0.348837 | 3   |
|                    | Proportion of hydrological basins showing high surface water extent changes (SDG 6.6.1.) | %                                                | 38       | 0.62     | 3   |
|                    | Tap water price per GDP per capita                                                       | USD/10 <sup>3</sup> m <sup>3</sup> /(USD/inh ab) | 0.354835 | 0.242858 | 10  |
|                    | Final point                                                                              | -                                                | -        | 0.45607  |     |
|                    |                                                                                          |                                                  |          |          |     |

|                        |                                                                                          |                                                  |              |              |    |
|------------------------|------------------------------------------------------------------------------------------|--------------------------------------------------|--------------|--------------|----|
| <b>North Macedonia</b> | Water use efficiency (SDG 6.4.1.)                                                        | USD/m <sup>3</sup>                               | 17.5557<br>7 | 0.43088<br>4 | 1  |
|                        | Water stress (SDG 6.4.2.)                                                                | %                                                | 38.7023<br>2 | 0.47232      | 1  |
|                        | Total population with access to safe drinking water (SDG 6.1.1.)                         | %                                                | 99.4         | 0.98823<br>5 | 1  |
|                        | Proportion of safely treated domestic wastewater flows (SDG 6.3.1.)                      | %                                                | 9.12154      | 0.08598<br>7 | 3  |
|                        | Degree of integrated water resources management implementation (SDG 6.5.1.)              | %                                                | 33           | 0.22093      | 3  |
|                        | Proportion of hydrological basins showing high surface water extent changes (SDG 6.6.1.) | %                                                | 0            | 1            | 3  |
|                        | Tap water price per GDP per capita                                                       | USD/10 <sup>3</sup> m <sup>3</sup> /(USD/inh ab) | 0.07304<br>9 | 0.04999<br>7 | 85 |
|                        | Final point                                                                              | -                                                | -            | 0.46405      |    |
|                        |                                                                                          |                                                  |              |              |    |
| <b>Norway</b>          | Water use efficiency (SDG 6.4.1.)                                                        | USD/m <sup>3</sup>                               | 129.581<br>3 | 0.70069<br>9 | 1  |
|                        | Water stress (SDG 6.4.2.)                                                                | %                                                | 2.04646<br>4 | 0.77416<br>9 | 1  |
|                        | Total population with access to safe drinking water (SDG 6.1.1.)                         | %                                                | 100          | 1            | 1  |
|                        | Proportion of safely treated domestic wastewater flows (SDG 6.3.1.)                      | %                                                | 75.6563<br>6 | 0.75516<br>3 | 3  |
|                        | Degree of integrated water resources management implementation (SDG 6.5.1.)              | %                                                | 68           | 0.62790<br>7 | 3  |
|                        | Proportion of hydrological basins showing high surface water extent changes (SDG 6.6.1.) | %                                                | 41           | 0.59         | 3  |
|                        | Tap water price per GDP per capita                                                       | USD/10 <sup>3</sup> m <sup>3</sup> /(USD/inh ab) | 0.09062<br>3 | 0.06202<br>4 | 10 |
|                        | Final point                                                                              | -                                                | -            | 0.64428      |    |
|                        |                                                                                          |                                                  |              |              |    |
| <b>Pakistan</b>        | Water use efficiency (SDG 6.4.1.)                                                        | USD/m <sup>3</sup>                               | 1.53976<br>6 | 0.10237<br>7 | 1  |
|                        | Water stress (SDG 6.4.2.)                                                                | %                                                | 116.305<br>7 | 0.35934<br>2 | 1  |
|                        | Total population with access to safe drinking water (SDG 6.1.1.)                         | %                                                | 91.4         | 0.83137<br>3 | 1  |
|                        | Proportion of safely treated domestic wastewater flows (SDG 6.3.1.)                      | %                                                | 27.9         | 0.27485<br>2 | 86 |
|                        | Degree of integrated water resources management implementation (SDG 6.5.1.)              | %                                                | 56           | 0.48837<br>2 | 3  |
|                        | Proportion of hydrological basins showing high surface water extent changes (SDG 6.6.1.) | %                                                | 33           | 0.67         | 3  |
|                        | Tap water price per GDP per capita                                                       | USD/10 <sup>3</sup> m <sup>3</sup> /(USD/inh ab) | 0.07539<br>3 | 0.05160<br>1 | 10 |
|                        | Final point                                                                              | -                                                | -            | 0.39684<br>5 |    |
|                        |                                                                                          |                                                  |              |              |    |
| <b>Panama</b>          | Water use efficiency (SDG 6.4.1.)                                                        | USD/m <sup>3</sup>                               | 41.1209<br>4 | 0.54577      | 1  |
|                        | Water stress (SDG 6.4.2.)                                                                | %                                                | 0.90107      | 0.85839      | 1  |

|                    |                                                                                          |                                                 |          |          |    |
|--------------------|------------------------------------------------------------------------------------------|-------------------------------------------------|----------|----------|----|
|                    |                                                                                          |                                                 | 1        | 3        |    |
|                    | Total population with access to safe drinking water (SDG 6.1.1.)                         | %                                               | 94.7     | 0.896078 | 1  |
|                    | Proportion of safely treated domestic wastewater flows (SDG 6.3.1.)                      | %                                               | 21.5     | 0.210483 | 87 |
|                    | Degree of integrated water resources management implementation (SDG 6.5.1.)              | %                                               | 33       | 0.22093  | 3  |
|                    | Proportion of hydrological basins showing high surface water extent changes (SDG 6.6.1.) | %                                               | 62       | 0.38     | 3  |
|                    | Tap water price per GDP per capita                                                       | USD/10 <sup>3</sup> m <sup>3</sup> /(USD/inhab) | 0.046458 | 0.031797 | 10 |
|                    | Final point                                                                              | -                                               | -        | 0.449065 |    |
| <b>Peru</b>        | Water use efficiency (SDG 6.4.1.)                                                        | USD/m <sup>3</sup>                              | 4.423579 | 0.244824 | 1  |
|                    | Water stress (SDG 6.4.2.)                                                                | %                                               | 7.181446 | 0.645269 | 1  |
|                    | Total population with access to safe drinking water (SDG 6.1.1.)                         | %                                               | 86.7     | 0.739216 | 1  |
|                    | Proportion of safely treated domestic wastewater flows (SDG 6.3.1.)                      | %                                               | 28.3     | 0.278875 | 88 |
|                    | Degree of integrated water resources management implementation (SDG 6.5.1.)              | %                                               | 41       | 0.313953 | 3  |
|                    | Proportion of hydrological basins showing high surface water extent changes (SDG 6.6.1.) | %                                               | 9        | 0.91     | 3  |
|                    | Tap water price per GDP per capita                                                       | USD/10 <sup>3</sup> m <sup>3</sup> /(USD/inhab) | 0.139549 | 0.095511 | 10 |
|                    | Final point                                                                              | -                                               | -        | 0.461093 |    |
| <b>Philippines</b> | Water use efficiency (SDG 6.4.1.)                                                        | USD/m <sup>3</sup>                              | 3.895399 | 0.227661 | 1  |
|                    | Water stress (SDG 6.4.2.)                                                                | %                                               | 26.25104 | 0.512179 | 1  |
|                    | Total population with access to safe drinking water (SDG 6.1.1.)                         | %                                               | 91.8     | 0.839216 | 1  |
|                    | Proportion of safely treated domestic wastewater flows (SDG 6.3.1.)                      | %                                               | 42.94676 | 0.426185 | 3  |
|                    | Degree of integrated water resources management implementation (SDG 6.5.1.)              | %                                               | 56       | 0.488372 | 3  |
|                    | Proportion of hydrological basins showing high surface water extent changes (SDG 6.6.1.) | %                                               | 9        | 0.91     | 3  |
|                    | Tap water price per GDP per capita                                                       | USD/10 <sup>3</sup> m <sup>3</sup> /(USD/inhab) | 0.124286 | 0.085065 | 10 |
|                    | Final point                                                                              | -                                               | -        | 0.498382 |    |
| <b>Poland</b>      | Water use efficiency (SDG 6.4.1.)                                                        | USD/m <sup>3</sup>                              | 51.60076 | 0.576413 | 1  |
|                    | Water stress (SDG 6.4.2.)                                                                | %                                               | 30       | 0.498472 | 1  |
|                    | Total population with access to safe drinking water (SDG 6.1.1.)                         | %                                               | 98.3     | 0.966667 | 1  |



|                 |                                                                                          |                                                     |              |              |    |
|-----------------|------------------------------------------------------------------------------------------|-----------------------------------------------------|--------------|--------------|----|
|                 | Proportion of safely treated domestic wastewater flows (SDG 6.3.1.)                      | %                                                   | 81.8518<br>3 | 0.81747<br>4 | 3  |
|                 | Degree of integrated water resources management implementation (SDG 6.5.1.)              | %                                                   | 74           | 0.69767<br>4 | 3  |
|                 | Proportion of hydrological basins showing high surface water extent changes (SDG 6.6.1.) | %                                                   | 4            | 0.96         | 3  |
|                 | Tap water price per GDP per capita                                                       | USD/10 <sup>3</sup> m <sup>3</sup> /(USD/inh<br>ab) | 0.09895<br>9 | 0.06773      | 10 |
|                 | Final point                                                                              | -                                                   | -            | 0.65491<br>9 |    |
| <b>Portugal</b> | Water use efficiency (SDG 6.4.1.)                                                        | USD/m <sup>3</sup>                                  | 28.4889<br>1 | 0.49623<br>2 | 1  |
|                 | Water stress (SDG 6.4.2.)                                                                | %                                                   | 12.3157<br>1 | 0.58988<br>8 | 1  |
|                 | Total population with access to safe drinking water (SDG 6.1.1.)                         | %                                                   | 100          | 1            | 1  |
|                 | Proportion of safely treated domestic wastewater flows (SDG 6.3.1.)                      | %                                                   | 73.5828<br>7 | 0.73430<br>9 | 3  |
|                 | Degree of integrated water resources management implementation (SDG 6.5.1.)              | %                                                   | 72           | 0.67441<br>9 | 3  |
|                 | Proportion of hydrological basins showing high surface water extent changes (SDG 6.6.1.) | %                                                   | 8            | 0.92         | 3  |
|                 | Tap water price per GDP per capita                                                       | USD/10 <sup>3</sup> m <sup>3</sup> /(USD/inh<br>ab) | 0.08164<br>9 | 0.05588<br>3 | 10 |
|                 | Final point                                                                              | -                                                   | -            | 0.63867<br>6 |    |
| <b>Qatar</b>    | Water use efficiency (SDG 6.4.1.)                                                        | USD/m <sup>3</sup>                                  | 192.419<br>8 | 0.75406<br>6 | 1  |
|                 | Water stress (SDG 6.4.2.)                                                                | %                                                   | 431.034<br>5 | 0.22483<br>9 | 1  |
|                 | Total population with access to safe drinking water (SDG 6.1.1.)                         | %                                                   | 100          | 1            | 1  |
|                 | Proportion of safely treated domestic wastewater flows (SDG 6.3.1.)                      | %                                                   | 99.5470<br>9 | 0.99544<br>5 | 3  |
|                 | Degree of integrated water resources management implementation (SDG 6.5.1.)              | %                                                   | 81           | 0.77907      | 3  |
|                 | Proportion of hydrological basins showing high surface water extent changes (SDG 6.6.1.) | %                                                   | 67           | 0.33         | 3  |
|                 | Tap water price per GDP per capita                                                       | USD/10 <sup>3</sup> m <sup>3</sup> /(USD/inh<br>ab) | 0.03939<br>8 | 0.02696<br>5 | 10 |
|                 | Final point                                                                              | -                                                   | -            | 0.58719<br>8 |    |
| <b>Romania</b>  | Water use efficiency (SDG 6.4.1.)                                                        | USD/m <sup>3</sup>                                  | 28.4681<br>8 | 0.49613<br>4 | 1  |
|                 | Water stress (SDG 6.4.2.)                                                                | %                                                   | 6.00692<br>8 | 0.66360<br>6 | 1  |
|                 | Total population with access to safe drinking water (SDG 6.1.1.)                         | %                                                   | 100          | 1            | 1  |
|                 | Proportion of safely treated domestic wastewater flows (SDG 6.3.1.)                      | %                                                   | 48.3224<br>7 | 0.48025<br>1 | 3  |
|                 | Degree of integrated water resources                                                     | %                                                   | 77           | 0.73255      | 3  |

|                     |                                                                                          |                                                  |          |          |    |
|---------------------|------------------------------------------------------------------------------------------|--------------------------------------------------|----------|----------|----|
|                     | management implementation (SDG 6.5.1.)                                                   |                                                  |          | 8        |    |
|                     | Proportion of hydrological basins showing high surface water extent changes (SDG 6.6.1.) | %                                                | 17       | 0.83     | 3  |
|                     | Tap water price per GDP per capita                                                       | USD/10 <sup>3</sup> m <sup>3</sup> /(USD/inh ab) | 0.085856 | 0.058762 | 89 |
|                     | Final point                                                                              | -                                                | -        | 0.608759 |    |
| <b>Russia</b>       | Water use efficiency (SDG 6.4.1.)                                                        | USD/m <sup>3</sup>                               | 18.91209 | 0.440929 | 1  |
|                     | Water stress (SDG 6.4.2.)                                                                | %                                                | 4.122243 | 0.702266 | 1  |
|                     | Total population with access to safe drinking water (SDG 6.1.1.)                         | %                                                | 96.9     | 0.939216 | 1  |
|                     | Proportion of safely treated domestic wastewater flows (SDG 6.3.1.)                      | %                                                | 12.92399 | 0.12423  | 3  |
|                     | Degree of integrated water resources management implementation (SDG 6.5.1.)              | %                                                | 88       | 0.860465 | 3  |
|                     | Proportion of hydrological basins showing high surface water extent changes (SDG 6.6.1.) | %                                                | 22       | 0.78     | 3  |
|                     | Tap water price per GDP per capita                                                       | USD/10 <sup>3</sup> m <sup>3</sup> /(USD/inh ab) | 0.077911 | 0.053324 | 10 |
|                     | Final point                                                                              | -                                                | -        | 0.557204 |    |
| <b>Saudi Arabia</b> | Water use efficiency (SDG 6.4.1.)                                                        | USD/m <sup>3</sup>                               | 25.07587 | 0.479008 | 1  |
|                     | Water stress (SDG 6.4.2.)                                                                | %                                                | 974.1667 | 0.141117 | 1  |
|                     | Total population with access to safe drinking water (SDG 6.1.1.)                         | %                                                | 97       | 0.941176 | 1  |
|                     | Proportion of safely treated domestic wastewater flows (SDG 6.3.1.)                      | %                                                | 79.63548 | 0.795183 | 3  |
|                     | Degree of integrated water resources management implementation (SDG 6.5.1.)              | %                                                | 57       | 0.5      | 3  |
|                     | Proportion of hydrological basins showing high surface water extent changes (SDG 6.6.1.) | %                                                | 14       | 0.86     | 3  |
|                     | Tap water price per GDP per capita                                                       | USD/10 <sup>3</sup> m <sup>3</sup> /(USD/inh ab) | 0.001641 | 0.001123 | 10 |
|                     | Final point                                                                              | -                                                | -        | 0.531087 |    |
| <b>Senegal</b>      | Water use efficiency (SDG 6.4.1.)                                                        | USD/m <sup>3</sup>                               | 5.718748 | 0.279487 | 1  |
|                     | Water stress (SDG 6.4.2.)                                                                | %                                                | 16.27645 | 0.561257 | 1  |
|                     | Total population with access to safe drinking water (SDG 6.1.1.)                         | %                                                | 78.5     | 0.578431 | 1  |
|                     | Proportion of safely treated domestic wastewater flows (SDG 6.3.1.)                      | %                                                | 14.16667 | 0.136728 | 3  |
|                     | Degree of integrated water resources management implementation (SDG 6.5.1.)              | %                                                | 50       | 0.418605 | 3  |
|                     | Proportion of hydrological basins                                                        | %                                                | 26       | 0.74     | 3  |

|                     |                                                                                          |                                                  |          |          |    |
|---------------------|------------------------------------------------------------------------------------------|--------------------------------------------------|----------|----------|----|
|                     | showing high surface water extent changes (SDG 6.6.1.)                                   |                                                  |          |          |    |
|                     | Tap water price per GDP per capita                                                       | USD/10 <sup>3</sup> m <sup>3</sup> /(USD/inh ab) | 0.528124 | 0.361461 | 10 |
|                     | Final point                                                                              | -                                                | -        | 0.439424 |    |
| <b>Serbia</b>       | Water use efficiency (SDG 6.4.1.)                                                        | USD/m <sup>3</sup>                               | 6.534429 | 0.297484 | 1  |
|                     | Water stress (SDG 6.4.2.)                                                                | %                                                | 6.000789 | 0.663711 | 1  |
|                     | Total population with access to safe drinking water (SDG 6.1.1.)                         | %                                                | 99.2     | 0.984314 | 1  |
|                     | Proportion of safely treated domestic wastewater flows (SDG 6.3.1.)                      | %                                                | 27.05284 | 0.266331 | 3  |
|                     | Degree of integrated water resources management implementation (SDG 6.5.1.)              | %                                                | 36       | 0.255814 | 3  |
|                     | Proportion of hydrological basins showing high surface water extent changes (SDG 6.6.1.) | %                                                | 21       | 0.79     | 3  |
|                     | Tap water price per GDP per capita                                                       | USD/10 <sup>3</sup> m <sup>3</sup> /(USD/inh ab) | 0.100579 | 0.068839 | 90 |
|                     | Final point                                                                              | -                                                | -        | 0.475213 |    |
| <b>Sierra Leone</b> | Water use efficiency (SDG 6.4.1.)                                                        | USD/m <sup>3</sup>                               | 8.41088  | 0.331559 | 1  |
|                     | Water stress (SDG 6.4.2.)                                                                | %                                                | 0.495794 | 0.919735 | 1  |
|                     | Total population with access to safe drinking water (SDG 6.1.1.)                         | %                                                | 62.6     | 0.266667 | 1  |
|                     | Proportion of safely treated domestic wastewater flows (SDG 6.3.1.)                      | %                                                | 8.392    | 0.078649 | 3  |
|                     | Degree of integrated water resources management implementation (SDG 6.5.1.)              | %                                                | 36       | 0.255814 | 3  |
|                     | Proportion of hydrological basins showing high surface water extent changes (SDG 6.6.1.) | %                                                | 22       | 0.78     | 3  |
|                     | Tap water price per GDP per capita                                                       | USD/10 <sup>3</sup> m <sup>3</sup> /(USD/inh ab) | 0.463458 | 0.317203 | 91 |
|                     | Final point                                                                              | -                                                | -        | 0.421375 |    |
| <b>Singapore</b>    | Water use efficiency (SDG 6.4.1.)                                                        | USD/m <sup>3</sup>                               | 476.27   | 0.876399 | 1  |
|                     | Water stress (SDG 6.4.2.)                                                                | %                                                | 83.11667 | 0.39384  | 1  |
|                     | Total population with access to safe drinking water (SDG 6.1.1.)                         | %                                                | 100      | 1        | 1  |
|                     | Proportion of safely treated domestic wastewater flows (SDG 6.3.1.)                      | %                                                | 100      | 1        | 3  |
|                     | Degree of integrated water resources management implementation (SDG 6.5.1.)              | %                                                | 100      | 1        | 3  |
|                     | Proportion of hydrological basins showing high surface water extent changes (SDG 6.6.1.) | %                                                | 0        | 1        | 3  |
|                     | Tap water price per GDP per capita                                                       | USD/10 <sup>3</sup> m <sup>3</sup> /(USD/inh ab) | 0.03045  | 0.02084  | 10 |

|                     |                                                                                          |                                                     |              |              |    |
|---------------------|------------------------------------------------------------------------------------------|-----------------------------------------------------|--------------|--------------|----|
|                     |                                                                                          | ab)                                                 | 7            | 6            |    |
|                     | Final point                                                                              | -                                                   | -            | 0.75586<br>9 |    |
| <b>Slovakia</b>     | Water use efficiency (SDG 6.4.1.)                                                        | USD/m <sup>3</sup>                                  | 149.873      | 0.72033<br>6 | 1  |
|                     | Water stress (SDG 6.4.2.)                                                                | %                                                   | 2.38812<br>4 | 0.75831<br>6 | 1  |
|                     | Total population with access to safe drinking water (SDG 6.1.1.)                         | %                                                   | 100          | 1            | 1  |
|                     | Proportion of safely treated domestic wastewater flows (SDG 6.3.1.)                      | %                                                   | 79.7851<br>9 | 0.79668<br>9 | 3  |
|                     | Degree of integrated water resources management implementation (SDG 6.5.1.)              | %                                                   | 61           | 0.54651<br>2 | 3  |
|                     | Proportion of hydrological basins showing high surface water extent changes (SDG 6.6.1.) | %                                                   | 0            | 1            | 3  |
|                     | Tap water price per GDP per capita                                                       | USD/10 <sup>3</sup> m <sup>3</sup> /(USD/inh<br>ab) | 0.05995<br>8 | 0.04103<br>6 | 92 |
|                     | Final point                                                                              | -                                                   | -            | 0.69469<br>8 |    |
| <b>Slovenia</b>     | Water use efficiency (SDG 6.4.1.)                                                        | USD/m <sup>3</sup>                                  | 41.3862<br>5 | 0.54663<br>8 | 1  |
|                     | Water stress (SDG 6.4.2.)                                                                | %                                                   | 6.78160<br>9 | 0.65115<br>1 | 1  |
|                     | Total population with access to safe drinking water (SDG 6.1.1.)                         | %                                                   | 99.5         | 0.99019<br>6 | 1  |
|                     | Proportion of safely treated domestic wastewater flows (SDG 6.3.1.)                      | %                                                   | 67.2051<br>3 | 0.67016<br>4 | 3  |
|                     | Degree of integrated water resources management implementation (SDG 6.5.1.)              | %                                                   | 87           | 0.84883<br>7 | 3  |
|                     | Proportion of hydrological basins showing high surface water extent changes (SDG 6.6.1.) | %                                                   | 18           | 0.82         | 3  |
|                     | Tap water price per GDP per capita                                                       | USD/10 <sup>3</sup> m <sup>3</sup> /(USD/inh<br>ab) | 0.04189<br>7 | 0.02867<br>5 | 93 |
|                     | Final point                                                                              | -                                                   | -            | 0.65080<br>9 |    |
| <b>South Africa</b> | Water use efficiency (SDG 6.4.1.)                                                        | USD/m <sup>3</sup>                                  | 13.7732<br>3 | 0.39813<br>1 | 1  |
|                     | Water stress (SDG 6.4.2.)                                                                | %                                                   | 65.0336<br>2 | 0.41903      | 1  |
|                     | Total population with access to safe drinking water (SDG 6.1.1.)                         | %                                                   | 93.2         | 0.86666<br>7 | 1  |
|                     | Proportion of safely treated domestic wastewater flows (SDG 6.3.1.)                      | %                                                   | 61.2913<br>8 | 0.61068<br>7 | 3  |
|                     | Degree of integrated water resources management implementation (SDG 6.5.1.)              | %                                                   | 71           | 0.66279<br>1 | 3  |
|                     | Proportion of hydrological basins showing high surface water extent changes (SDG 6.6.1.) | %                                                   | 26           | 0.74         | 3  |
|                     | Tap water price per GDP per capita                                                       | USD/10 <sup>3</sup> m <sup>3</sup> /(USD/inh<br>ab) | 0.30229<br>4 | 0.20689<br>7 | 10 |
|                     | Final point                                                                              | -                                                   | -            | 0.55774<br>3 |    |

|                    |                                                                                          |                                                  |              |              |     |
|--------------------|------------------------------------------------------------------------------------------|--------------------------------------------------|--------------|--------------|-----|
| <b>South Korea</b> | Water use efficiency (SDG 6.4.1.)                                                        | USD/m <sup>3</sup>                               | 54.4090<br>2 | 0.58356<br>6 | 1   |
|                    | Water stress (SDG 6.4.2.)                                                                | %                                                | 85.2218<br>3 | 0.39127<br>1 | 1   |
|                    | Total population with access to safe drinking water (SDG 6.1.1.)                         | %                                                | 97.6         | 0.95294<br>1 | 1   |
|                    | Proportion of safely treated domestic wastewater flows (SDG 6.3.1.)                      | %                                                | 99.5250<br>9 | 0.99522<br>4 | 3   |
|                    | Degree of integrated water resources management implementation (SDG 6.5.1.)              | %                                                | 76           | 0.72093      | 3   |
|                    | Proportion of hydrological basins showing high surface water extent changes (SDG 6.6.1.) | %                                                | 6            | 0.94         | 3   |
|                    | Tap water price per GDP per capita                                                       | USD/10 <sup>3</sup> m <sup>3</sup> /(USD/inh ab) | 0.02651<br>3 | 0.01814<br>6 | 10  |
|                    | Final point                                                                              | -                                                | -            | 0.65744      |     |
|                    |                                                                                          |                                                  |              |              |     |
| <b>South Sudan</b> | Water use efficiency (SDG 6.4.1.)                                                        | USD/m <sup>3</sup>                               | 8.57267<br>8 | 0.33413<br>1 | 1   |
|                    | Water stress (SDG 6.4.2.)                                                                | %                                                | 4.22607<br>6 | 0.69971<br>2 | 1   |
|                    | Total population with access to safe drinking water (SDG 6.1.1.)                         | %                                                | 58.7         | 0.19019<br>6 | 1   |
|                    | Proportion of safely treated domestic wastewater flows (SDG 6.3.1.)                      | %                                                | 2.5          | 0.01939      | 3   |
|                    | Degree of integrated water resources management implementation (SDG 6.5.1.)              | %                                                | 43           | 0.33720<br>9 | 3   |
|                    | Proportion of hydrological basins showing high surface water extent changes (SDG 6.6.1.) | %                                                | 16           | 0.84         | 3   |
|                    | Tap water price per GDP per capita                                                       | USD/10 <sup>3</sup> m <sup>3</sup> /(USD/inh ab) | 0.70457<br>7 | 0.48223      | 108 |
|                    | Final point                                                                              | -                                                | -            | 0.41469<br>5 |     |
|                    |                                                                                          |                                                  |              |              |     |
| <b>Spain</b>       | Water use efficiency (SDG 6.4.1.)                                                        | USD/m <sup>3</sup>                               | 36.2308<br>6 | 0.52868<br>1 | 1   |
|                    | Water stress (SDG 6.4.2.)                                                                | %                                                | 43.2540<br>4 | 0.46090<br>4 | 1   |
|                    | Total population with access to safe drinking water (SDG 6.1.1.)                         | %                                                | 100          | 1            | 1   |
|                    | Proportion of safely treated domestic wastewater flows (SDG 6.3.1.)                      | %                                                | 86.0158<br>2 | 0.85935<br>4 | 3   |
|                    | Degree of integrated water resources management implementation (SDG 6.5.1.)              | %                                                | 87           | 0.84883<br>7 | 3   |
|                    | Proportion of hydrological basins showing high surface water extent changes (SDG 6.6.1.) | %                                                | 19           | 0.81         | 3   |
|                    | Tap water price per GDP per capita                                                       | USD/10 <sup>3</sup> m <sup>3</sup> /(USD/inh ab) | 0.07504<br>9 | 0.05136<br>6 | 10  |
|                    | Final point                                                                              | -                                                | -            | 0.65130<br>6 |     |
|                    |                                                                                          |                                                  |              |              |     |
| <b>Suriname</b>    | Water use efficiency (SDG 6.4.1.)                                                        | USD/m <sup>3</sup>                               | 6.92486      | 0.30531<br>8 | 1   |

|                    |                                                                                          |                                                  |              |              |    |
|--------------------|------------------------------------------------------------------------------------------|--------------------------------------------------|--------------|--------------|----|
|                    | Water stress (SDG 6.4.2.)                                                                | %                                                | 3.95060<br>9 | 0.70663<br>2 | 1  |
|                    | Total population with access to safe drinking water (SDG 6.1.1.)                         | %                                                | 94.8         | 0.89803<br>9 | 1  |
|                    | Proportion of safely treated domestic wastewater flows (SDG 6.3.1.)                      | %                                                | 23.8176<br>2 | 0.23379<br>3 | 3  |
|                    | Degree of integrated water resources management implementation (SDG 6.5.1.)              | %                                                | 23           | 0.10465<br>1 | 3  |
|                    | Proportion of hydrological basins showing high surface water extent changes (SDG 6.6.1.) | %                                                | 12           | 0.88         | 3  |
|                    | Tap water price per GDP per capita                                                       | USD/10 <sup>3</sup> m <sup>3</sup> /(USD/inh ab) | 0.05325<br>5 | 0.03644<br>9 | 94 |
|                    | Final point                                                                              | -                                                | -            | 0.45212<br>6 |    |
| <b>Sweden</b>      | Water use efficiency (SDG 6.4.1.)                                                        | USD/m <sup>3</sup>                               | 187.925<br>4 | 0.75087<br>6 | 1  |
|                    | Water stress (SDG 6.4.2.)                                                                | %                                                | 3.58297<br>3 | 0.71666<br>2 | 1  |
|                    | Total population with access to safe drinking water (SDG 6.1.1.)                         | %                                                | 100          | 1            | 1  |
|                    | Proportion of safely treated domestic wastewater flows (SDG 6.3.1.)                      | %                                                | 95.2005      | 0.95172<br>9 | 3  |
|                    | Degree of integrated water resources management implementation (SDG 6.5.1.)              | %                                                | 86           | 0.83720<br>9 | 3  |
|                    | Proportion of hydrological basins showing high surface water extent changes (SDG 6.6.1.) | %                                                | 19           | 0.81         | 3  |
|                    | Tap water price per GDP per capita                                                       | USD/10 <sup>3</sup> m <sup>3</sup> /(USD/inh ab) | 0.07391<br>6 | 0.05059      | 10 |
|                    | Final point                                                                              | -                                                | -            | 0.73100<br>9 |    |
| <b>Switzerland</b> | Water use efficiency (SDG 6.4.1.)                                                        | USD/m <sup>3</sup>                               | 404.817<br>6 | 0.85445<br>8 | 1  |
|                    | Water stress (SDG 6.4.2.)                                                                | %                                                | 6.49885<br>6 | 0.65552<br>4 | 1  |
|                    | Total population with access to safe drinking water (SDG 6.1.1.)                         | %                                                | 100          | 1            | 1  |
|                    | Proportion of safely treated domestic wastewater flows (SDG 6.3.1.)                      | %                                                | 99.2043<br>6 | 0.99199<br>8 | 3  |
|                    | Degree of integrated water resources management implementation (SDG 6.5.1.)              | %                                                | 81           | 0.77907      | 3  |
|                    | Proportion of hydrological basins showing high surface water extent changes (SDG 6.6.1.) | %                                                | 0            | 1            | 3  |
|                    | Tap water price per GDP per capita                                                       | USD/10 <sup>3</sup> m <sup>3</sup> /(USD/inh ab) | 0.03543<br>5 | 0.02425<br>3 | 10 |
|                    | Final point                                                                              | -                                                | -            | 0.7579       |    |
| <b>Syria</b>       | Water use efficiency (SDG 6.4.1.)                                                        | USD/m <sup>3</sup>                               | 1.08327<br>3 | 0.05491<br>3 | 1  |
|                    | Water stress (SDG 6.4.2.)                                                                | %                                                | 124.360<br>1 | 0.35246<br>7 | 1  |
|                    | Total population with access to safe drinking water (SDG 6.1.1.)                         | %                                                | 90.1         | 0.80588<br>2 | 1  |

|                    |                                                                                          |                                                     |              |              |     |
|--------------------|------------------------------------------------------------------------------------------|-----------------------------------------------------|--------------|--------------|-----|
|                    | Proportion of safely treated domestic wastewater flows (SDG 6.3.1.)                      | %                                                   | 45.2         | 0.44884<br>7 | 109 |
|                    | Degree of integrated water resources management implementation (SDG 6.5.1.)              | %                                                   | 56           | 0.48837<br>2 | 3   |
|                    | Proportion of hydrological basins showing high surface water extent changes (SDG 6.6.1.) | %                                                   | 33           | 0.67         | 3   |
|                    | Tap water price per GDP per capita                                                       | USD/10 <sup>3</sup> m <sup>3</sup> /(USD/inh<br>ab) | 0.13598<br>3 | 0.09307      | 110 |
|                    | Final point                                                                              | -                                                   | -            | 0.41622<br>2 |     |
| <b>Tajikistan</b>  | Water use efficiency (SDG 6.4.1.)                                                        | USD/m <sup>3</sup>                                  | 1.01921<br>4 | 0.04668<br>5 | 1   |
|                    | Water stress (SDG 6.4.2.)                                                                | %                                                   | 69.9432<br>6 | 0.41155<br>8 | 1   |
|                    | Total population with access to safe drinking water (SDG 6.1.1.)                         | %                                                   | 73.8         | 0.48627<br>5 | 1   |
|                    | Proportion of safely treated domestic wastewater flows (SDG 6.3.1.)                      | %                                                   | 13.3         | 0.12801<br>2 | 95  |
|                    | Degree of integrated water resources management implementation (SDG 6.5.1.)              | %                                                   | 46           | 0.37209<br>3 | 3   |
|                    | Proportion of hydrological basins showing high surface water extent changes (SDG 6.6.1.) | %                                                   | 6            | 0.94         | 3   |
|                    | Tap water price per GDP per capita                                                       | USD/10 <sup>3</sup> m <sup>3</sup> /(USD/inh<br>ab) | 0.07871<br>7 | 0.05387<br>6 | 96  |
|                    | Final point                                                                              | -                                                   | -            | 0.34835<br>7 |     |
| <b>Thailand</b>    | Water use efficiency (SDG 6.4.1.)                                                        | USD/m <sup>3</sup>                                  | 7.27310<br>7 | 0.31194      | 1   |
|                    | Water stress (SDG 6.4.2.)                                                                | %                                                   | 23.0139<br>4 | 0.52569<br>2 | 1   |
|                    | Total population with access to safe drinking water (SDG 6.1.1.)                         | %                                                   | 97.8         | 0.95686<br>3 | 1   |
|                    | Proportion of safely treated domestic wastewater flows (SDG 6.3.1.)                      | %                                                   | 24.4022<br>9 | 0.23967<br>3 | 3   |
|                    | Degree of integrated water resources management implementation (SDG 6.5.1.)              | %                                                   | 53           | 0.45348<br>8 | 3   |
|                    | Proportion of hydrological basins showing high surface water extent changes (SDG 6.6.1.) | %                                                   | 11           | 0.89         | 3   |
|                    | Tap water price per GDP per capita                                                       | USD/10 <sup>3</sup> m <sup>3</sup> /(USD/inh<br>ab) | 0.08568<br>6 | 0.05864<br>6 | 97  |
|                    | Final point                                                                              | -                                                   | -            | 0.4909       |     |
| <b>Timor-Leste</b> | Water use efficiency (SDG 6.4.1.)                                                        | USD/m <sup>3</sup>                                  | 1.53046<br>1 | 0.10155<br>9 | 1   |
|                    | Water stress (SDG 6.4.2.)                                                                | %                                                   | 28.2682<br>1 | 0.50457<br>8 | 1   |
|                    | Total population with access to safe drinking water (SDG 6.1.1.)                         | %                                                   | 71.9         | 0.44902      | 1   |
|                    | Proportion of safely treated domestic wastewater flows (SDG 6.3.1.)                      | %                                                   | 12.7         | 0.12197<br>7 | 98  |
|                    | Degree of integrated water resources management implementation (SDG                      | %                                                   | 14           | 0            | 3   |

|                |                                                                                          |                                                  |          |          |     |
|----------------|------------------------------------------------------------------------------------------|--------------------------------------------------|----------|----------|-----|
|                | 6.5.1.)                                                                                  |                                                  |          |          |     |
|                | Proportion of hydrological basins showing high surface water extent changes (SDG 6.6.1.) | %                                                | 50       | 0.5      | 3   |
|                | Tap water price per GDP per capita                                                       | USD/10 <sup>3</sup> m <sup>3</sup> /(USD/inh ab) | 0.350725 | 0.240045 | 99  |
|                | Final point                                                                              | -                                                | -        | 0.273883 |     |
| <b>Togo</b>    | Water use efficiency (SDG 6.4.1.)                                                        | USD/m <sup>3</sup>                               | 21.37561 | 0.457458 | 1   |
|                | Water stress (SDG 6.4.2.)                                                                | %                                                | 3.391635 | 0.722297 | 1   |
|                | Total population with access to safe drinking water (SDG 6.1.1.)                         | %                                                | 63.1     | 0.276471 | 1   |
|                | Proportion of safely treated domestic wastewater flows (SDG 6.3.1.)                      | %                                                | 15.0379  | 0.145491 | 3   |
|                | Degree of integrated water resources management implementation (SDG 6.5.1.)              | %                                                | 34       | 0.232558 | 3   |
|                | Proportion of hydrological basins showing high surface water extent changes (SDG 6.6.1.) | %                                                | 22       | 0.78     | 3   |
|                | Tap water price per GDP per capita                                                       | USD/10 <sup>3</sup> m <sup>3</sup> /(USD/inh ab) | 0.713669 | 0.488453 | 44  |
|                | Final point                                                                              | -                                                | -        | 0.443247 |     |
| <b>Tunisia</b> | Water use efficiency (SDG 6.4.1.)                                                        | USD/m <sup>3</sup>                               | 10.01886 | 0.355173 | 1   |
|                | Water stress (SDG 6.4.2.)                                                                | %                                                | 98.1134  | 0.376808 | 1   |
|                | Total population with access to safe drinking water (SDG 6.1.1.)                         | %                                                | 97.7     | 0.954902 | 1   |
|                | Proportion of safely treated domestic wastewater flows (SDG 6.3.1.)                      | %                                                | 59.72575 | 0.59494  | 3   |
|                | Degree of integrated water resources management implementation (SDG 6.5.1.)              | %                                                | 60       | 0.534884 | 3   |
|                | Proportion of hydrological basins showing high surface water extent changes (SDG 6.6.1.) | %                                                | 21       | 0.79     | 3   |
|                | Tap water price per GDP per capita                                                       | USD/10 <sup>3</sup> m <sup>3</sup> /(USD/inh ab) | 0.185635 | 0.127054 | 100 |
|                | Final point                                                                              | -                                                | -        | 0.533394 |     |
| <b>Türkiye</b> | Water use efficiency (SDG 6.4.1.)                                                        | USD/m <sup>3</sup>                               | 13.75347 | 0.397937 | 1   |
|                | Water stress (SDG 6.4.2.)                                                                | %                                                | 45.7057  | 0.455243 | 1   |
|                | Total population with access to safe drinking water (SDG 6.1.1.)                         | %                                                | 100      | 1        | 1   |
|                | Proportion of safely treated domestic wastewater flows (SDG 6.3.1.)                      | %                                                | 63.32585 | 0.631148 | 3   |
|                | Degree of integrated water resources management implementation (SDG 6.5.1.)              | %                                                | 72       | 0.674419 | 3   |
|                | Proportion of hydrological basins showing high surface water extent                      | %                                                | 40       | 0.6      | 3   |



|                     |                                                                                          |                                                  |          |          |     |
|---------------------|------------------------------------------------------------------------------------------|--------------------------------------------------|----------|----------|-----|
|                     | changes (SDG 6.6.1.)                                                                     |                                                  |          |          |     |
|                     | Tap water price per GDP per capita                                                       | USD/10 <sup>3</sup> m <sup>3</sup> /(USD/inh ab) | 0.109509 | 0.074951 | 10  |
|                     | Final point                                                                              | -                                                | -        | 0.547671 |     |
| <b>Turkmenistan</b> | Water use efficiency (SDG 6.4.1.)                                                        | USD/m <sup>3</sup>                               | 1.17144  | 0.065474 | 1   |
|                     | Water stress (SDG 6.4.2.)                                                                | %                                                | 135.2138 | 0.343876 | 1   |
|                     | Total population with access to safe drinking water (SDG 6.1.1.)                         | %                                                | 60.4     | 0.223529 | 1   |
|                     | Proportion of safely treated domestic wastewater flows (SDG 6.3.1.)                      | %                                                | 14.8     | 0.143098 | 101 |
|                     | Degree of integrated water resources management implementation (SDG 6.5.1.)              | %                                                | 64       | 0.581395 | 3   |
|                     | Proportion of hydrological basins showing high surface water extent changes (SDG 6.6.1.) | %                                                | 25       | 0.75     | 3   |
|                     | Tap water price per GDP per capita                                                       | USD/10 <sup>3</sup> m <sup>3</sup> /(USD/inh ab) | 0        | 0        | 102 |
|                     | Final point                                                                              | -                                                | -        | 0.301053 |     |
| <b>Ukraine</b>      | Water use efficiency (SDG 6.4.1.)                                                        | USD/m <sup>3</sup>                               | 7.617022 | 0.318177 | 1   |
|                     | Water stress (SDG 6.4.2.)                                                                | %                                                | 12.25577 | 0.590389 | 1   |
|                     | Total population with access to safe drinking water (SDG 6.1.1.)                         | %                                                | 96.2     | 0.92549  | 1   |
|                     | Proportion of safely treated domestic wastewater flows (SDG 6.3.1.)                      | %                                                | 34.28519 | 0.339071 | 3   |
|                     | Degree of integrated water resources management implementation (SDG 6.5.1.)              | %                                                | 39       | 0.290698 | 3   |
|                     | Proportion of hydrological basins showing high surface water extent changes (SDG 6.6.1.) | %                                                | 1        | 0.99     | 3   |
|                     | Tap water price per GDP per capita                                                       | USD/10 <sup>3</sup> m <sup>3</sup> /(USD/inh ab) | 0.083486 | 0.05714  | 10  |
|                     | Final point                                                                              | -                                                | -        | 0.501566 |     |
| <b>U.A.E.</b>       | Water use efficiency (SDG 6.4.1.)                                                        | USD/m <sup>3</sup>                               | 74.45145 | 0.625898 | 1   |
|                     | Water stress (SDG 6.4.2.)                                                                | %                                                | 1587.333 | 0.090987 | 1   |
|                     | Total population with access to safe drinking water (SDG 6.1.1.)                         | %                                                | 99.6     | 0.992157 | 1   |
|                     | Proportion of safely treated domestic wastewater flows (SDG 6.3.1.)                      | %                                                | 95.90876 | 0.958852 | 3   |
|                     | Degree of integrated water resources management implementation (SDG 6.5.1.)              | %                                                | 79       | 0.755814 | 3   |
|                     | Proportion of hydrological basins showing high surface water extent changes (SDG 6.6.1.) | %                                                | 29       | 0.71     | 3   |
|                     | Tap water price per GDP per capita                                                       | USD/10 <sup>3</sup> m <sup>3</sup> /(USD/inh ab) | 0.094586 | 0.064737 | 10  |

|                   |                                                                                          |                                                     |              |              |     |
|-------------------|------------------------------------------------------------------------------------------|-----------------------------------------------------|--------------|--------------|-----|
|                   | Final point                                                                              | -                                                   | -            | 0.59977<br>8 |     |
| <b>U.K.</b>       | Water use efficiency (SDG 6.4.1.)                                                        | USD/m <sup>3</sup>                                  | 307.616<br>7 | 0.81739<br>5 | 1   |
|                   | Water stress (SDG 6.4.2.)                                                                | %                                                   | 14.3546<br>5 | 0.57415<br>8 | 1   |
|                   | Total population with access to safe drinking water (SDG 6.1.1.)                         | %                                                   | 100          | 1            | 1   |
|                   | Proportion of safely treated domestic wastewater flows (SDG 6.3.1.)                      | %                                                   | 98.8016<br>8 | 0.98794<br>8 | 3   |
|                   | Degree of integrated water resources management implementation (SDG 6.5.1.)              | %                                                   | 79           | 0.75581<br>4 | 3   |
|                   | Proportion of hydrological basins showing high surface water extent changes (SDG 6.6.1.) | %                                                   | 65           | 0.35         | 3   |
|                   | Tap water price per GDP per capita                                                       | USD/10 <sup>3</sup> m <sup>3</sup> /(USD/inh<br>ab) | 0.07888<br>4 | 0.05399      | 10  |
|                   | Final point                                                                              | -                                                   | -            | 0.64847<br>2 |     |
|                   |                                                                                          |                                                     |              |              |     |
| <b>U.S.A.</b>     | Water use efficiency (SDG 6.4.1.)                                                        | USD/m <sup>3</sup>                                  | 43.0341<br>5 | 0.55190<br>9 | 1   |
|                   | Water stress (SDG 6.4.2.)                                                                | %                                                   | 28.1619<br>8 | 0.50496<br>4 | 1   |
|                   | Total population with access to safe drinking water (SDG 6.1.1.)                         | %                                                   | 99.2         | 0.98431<br>4 | 1   |
|                   | Proportion of safely treated domestic wastewater flows (SDG 6.3.1.)                      | %                                                   | 91.0647<br>6 | 0.91013<br>3 | 3   |
|                   | Degree of integrated water resources management implementation (SDG 6.5.1.)              | %                                                   | 77           | 0.73255<br>8 | 3   |
|                   | Proportion of hydrological basins showing high surface water extent changes (SDG 6.6.1.) | %                                                   | 11           | 0.89         | 3   |
|                   | Tap water price per GDP per capita                                                       | USD/10 <sup>3</sup> m <sup>3</sup> /(USD/inh<br>ab) | 0.04130<br>1 | 0.02826<br>7 | 10  |
|                   | Final point                                                                              | -                                                   | -            | 0.65744<br>9 |     |
|                   |                                                                                          |                                                     |              |              |     |
| <b>Uzbekistan</b> | Water use efficiency (SDG 6.4.1.)                                                        | USD/m <sup>3</sup>                                  | 1.60451      | 0.10793<br>7 | 1   |
|                   | Water stress (SDG 6.4.2.)                                                                | %                                                   | 168.924<br>6 | 0.32102      | 1   |
|                   | Total population with access to safe drinking water (SDG 6.1.1.)                         | %                                                   | 87.3         | 0.75098      | 1   |
|                   | Proportion of safely treated domestic wastewater flows (SDG 6.3.1.)                      | %                                                   | 32.266       | 0.31876<br>3 | 3   |
|                   | Degree of integrated water resources management implementation (SDG 6.5.1.)              | %                                                   | 48           | 0.39534<br>9 | 3   |
|                   | Proportion of hydrological basins showing high surface water extent changes (SDG 6.6.1.) | %                                                   | 26           | 0.74         | 3   |
|                   | Tap water price per GDP per capita                                                       | USD/10 <sup>3</sup> m <sup>3</sup> /(USD/inh<br>ab) | 0.07017<br>8 | 0.04803<br>2 | 103 |
|                   | Final point                                                                              | -                                                   | -            | 0.38315<br>4 |     |
|                   |                                                                                          |                                                     |              |              |     |

|                 |                                                                                          |                                                     |              |              |     |
|-----------------|------------------------------------------------------------------------------------------|-----------------------------------------------------|--------------|--------------|-----|
| <b>Yemen</b>    | Water use efficiency (SDG 6.4.1.)                                                        | USD/m <sup>3</sup>                                  | 5.19451<br>1 | 0.26650<br>9 | 1   |
|                 | Water stress (SDG 6.4.2.)                                                                | %                                                   | 169.761<br>9 | 0.32051<br>3 | 1   |
|                 | Total population with access to safe drinking water (SDG 6.1.1.)                         | %                                                   | 54.9         | 0.11568<br>6 | 1   |
|                 | Proportion of safely treated domestic wastewater flows (SDG 6.3.1.)                      | %                                                   | 34.4029<br>2 | 0.34025<br>5 | 3   |
|                 | Degree of integrated water resources management implementation (SDG 6.5.1.)              | %                                                   | 36           | 0.25581<br>4 | 3   |
|                 | Proportion of hydrological basins showing high surface water extent changes (SDG 6.6.1.) | %                                                   | 22           | 0.78         | 3   |
|                 | Tap water price per GDP per capita                                                       | USD/10 <sup>3</sup> m <sup>3</sup> /(USD/inh<br>ab) | 1.09133<br>6 | 0.74693<br>8 | 111 |
|                 | Final point                                                                              | -                                                   | -            | 0.40367<br>4 |     |
|                 |                                                                                          |                                                     |              |              |     |
| <b>Zambia</b>   | Water use efficiency (SDG 6.4.1.)                                                        | USD/m <sup>3</sup>                                  | 13.7524<br>1 | 0.39792<br>7 | 1   |
|                 | Water stress (SDG 6.4.2.)                                                                | %                                                   | 2.83549<br>8 | 0.74068<br>5 | 1   |
|                 | Total population with access to safe drinking water (SDG 6.1.1.)                         | %                                                   | 65.4         | 0.32156<br>9 | 1   |
|                 | Proportion of safely treated domestic wastewater flows (SDG 6.3.1.)                      | %                                                   | 14.2         | 0.13706<br>3 | 104 |
|                 | Degree of integrated water resources management implementation (SDG 6.5.1.)              | %                                                   | 58           | 0.51162<br>8 | 3   |
|                 | Proportion of hydrological basins showing high surface water extent changes (SDG 6.6.1.) | %                                                   | 20           | 0.8          | 3   |
|                 | Tap water price per GDP per capita                                                       | USD/10 <sup>3</sup> m <sup>3</sup> /(USD/inh<br>ab) | 0.30148<br>2 | 0.20634<br>2 | 105 |
|                 | Final point                                                                              | -                                                   | -            | 0.44503<br>1 |     |
|                 |                                                                                          |                                                     |              |              |     |
| <b>Zimbabwe</b> | Water use efficiency (SDG 6.4.1.)                                                        | USD/m <sup>3</sup>                                  | 4.46999<br>3 | 0.24623<br>3 | 1   |
|                 | Water stress (SDG 6.4.2.)                                                                | %                                                   | 35.4053<br>9 | 0.48146<br>2 | 1   |
|                 | Total population with access to safe drinking water (SDG 6.1.1.)                         | %                                                   | 76.9         | 0.54705<br>9 | 1   |
|                 | Proportion of safely treated domestic wastewater flows (SDG 6.3.1.)                      | %                                                   | 22.9922      | 0.22549<br>1 | 3   |
|                 | Degree of integrated water resources management implementation (SDG 6.5.1.)              | %                                                   | 63           | 0.56976<br>7 | 3   |
|                 | Proportion of hydrological basins showing high surface water extent changes (SDG 6.6.1.) | %                                                   | 12           | 0.88         | 3   |
|                 | Tap water price per GDP per capita                                                       | USD/10 <sup>3</sup> m <sup>3</sup> /(USD/inh<br>ab) | 0.53279<br>8 | 0.36466<br>1 | 44  |
|                 | Final point                                                                              | -                                                   | -            | 0.47352<br>5 |     |
|                 |                                                                                          |                                                     |              |              |     |

Table S4. Current and future water production and energy consumption of PUB. Singapore's National Water Agency.

| <b>Year</b>           | <b>Water production</b>                                                                                    | <b>Energy consumption</b>                                                                                                                                                                                                                                        |
|-----------------------|------------------------------------------------------------------------------------------------------------|------------------------------------------------------------------------------------------------------------------------------------------------------------------------------------------------------------------------------------------------------------------|
| 2021                  | 594.12 Mm <sup>3</sup> /year<br>(430 MGD) <sup>112</sup>                                                   | 941.9 GWh/year in total<br>845.8 GWh/year from natural gas (89.8%)<br>96.1 GWh/year from photovoltaic (10.2%) <sup>113</sup>                                                                                                                                     |
| 2060<br>Unsustainable | 1184.24 Mm <sup>3</sup> /year<br>(860 MGD)<br><i>Two times more compared to<br/>2021<sup>112,114</sup></i> | 3767.6 GWh/year in total<br>3383.3 GWh/year from natural gas (89.8%)<br>384.3 GWh/year from photovoltaic (10.2%)<br><i>Four times more compared to 2021<sup>114,115</sup></i>                                                                                    |
| 2060<br>Sustainable   | 1184.24 Mm <sup>3</sup> /year<br>(860 MGD)<br><i>Two times more compared to<br/>2021<sup>112,114</sup></i> | 941.9 GWh/year in total<br>461.4 GWh/year from natural gas (49%)<br>480.5 GWh/year from photovoltaic (51%) <sup>113</sup><br><i>No change in total energy compared to 2021<sup>116</sup><br/>Five times more solar energy compared to<br/>2021<sup>117</sup></i> |

## Supporting References

1. AQUASTAT Database, (FAO 2020, accessed 9 September 2022); <https://www.fao.org/aquastat/statistics/query/index.html?lang=en>.
2. Yale University's Environmental Performance Index (EPI), Unsafe drinking water (2023, accessed 18 May 2023); <https://epi.yale.edu/epi-results/2022/component/uwd>.
3. United nations, UN Water Integrated Monitoring Initiative for SDG 6 (2020, accessed 18 May 2023) ; <https://www.unwater.org/our-work/integrated-monitoring-initiative-sdg-6>.
4. UKT Price Hike Approved, Drinking Water Price Increases 40% (exitnews, 2017, accessed 18 May 2023); <https://exit.al/en/ukt-price-hike-approved-drinking-water-price-increases-40/>.
5. S. Boukhari, D. Yassine, A. Guedri & A. E. K. Guebail. The impact of actual water pricing in Algeria on the environmental dimension of sustainable development. 2011, 2, 427-432
6. World Health Organization, 6.3.1. Safely Treated Household Wastewater Angola 2020 Country Estimate (2020, accessed 18 May 2023) ; [https://cdn.who.int/media/docs/default-source/wash-documents/wash-coverage/2021-country-files-for-sdg-631/angola\\_ago\\_sdg631\\_2021.xlsx?sfvrsn=84d3e406\\_6](https://cdn.who.int/media/docs/default-source/wash-documents/wash-coverage/2021-country-files-for-sdg-631/angola_ago_sdg631_2021.xlsx?sfvrsn=84d3e406_6).
7. Value of Water in Angola (Kunene River Awareness Kit, accessed 18 May 2023); [http://www.kunene.riverawarenesskit.com/kunenerak\\_com/EN/MANAGEMENT/VALUE\\_OF\\_WATER/ECONOMIC\\_VALUE/ANGOLA.HTM](http://www.kunene.riverawarenesskit.com/kunenerak_com/EN/MANAGEMENT/VALUE_OF_WATER/ECONOMIC_VALUE/ANGOLA.HTM).
8. World Health Organization, 6.3.1. Safely Treated Household Wastewater Antigua and Barbuda 2020 Country Estimate (2020, accessed 18 May 2023) ; <https://cdn.who.int/media/docs/default-source/wash-documents/wash-coverage/2021->

- [country-files-for-sdg-631/antigua-and-barbuda\\_atg\\_sdg631\\_2021.xlsx?sfvrsn=b9b2e0c8\\_6](#).
9. Rates, (APUA, accessed 18 May 2023); <http://www.apua.ag/customer-service/rates/>.
  10. The Water Price Index (Holidu, 2021, accessed 18 May 2023); <https://www.holidu.com/magazine/water-price-index-intl>.
  11. Water management for an entire country (Veolia 2017, accessed 18 May 2023); <https://www.veolia.com/en/drinking-water-waste-water-sanitation-armenia>.
  12. Price of water doubles in Azerbaijan – but what about the quality? (JAM news, 2021, accessed 18 May 2023); <https://jam-news.net/price-of-water-doubles-in-azerbaijan-but-what-about-the-quality/>.
  13. W. K. Al-Zubari. The Costs of Municipal Water Supply in Bahrain. *Energy, Environment and Resources (Produced as Part of the Valuing Vital Resources in the Gulf Series)*, Chatham House, UK, 2014,
  14. Water tariff in Dhaka set to rise again (The daily star, 2021, accessed 18 May 2023); <https://www.thedailystar.net/frontpage/news/water-tariff-dhaka-set-rise-again-2065069>.
  15. World Health Organization, 6.3.1. Safely Treated Household Wastewater Barbados 2020 Country Estimate (2020, accessed 18 May 2023) ; [https://cdn.who.int/media/docs/default-source/wash-documents/wash-coverage/2021-country-files-for-sdg-631/barbados\\_brb\\_sdg631\\_2021.xlsx?sfvrsn=eee9d6fc\\_6](https://cdn.who.int/media/docs/default-source/wash-documents/wash-coverage/2021-country-files-for-sdg-631/barbados_brb_sdg631_2021.xlsx?sfvrsn=eee9d6fc_6).
  16. New Water Tariffs, (Barbados GiS, 2009, accessed 18 May 2023); <https://gisbarbados.gov.bb/blog/new-water-tariffs/>.
  17. Tariffs and fines, (Great Water, accessed 18 May 2023); <https://greatwater.by/en/info/podklyucheniye/tarify-i-shtrafy/>.
  18. World Health Organization, 6.3.1. Safely Treated Household Wastewater Belize 2020 Country Estimate (2020, accessed 18 May 2023) ;

- [https://cdn.who.int/media/docs/default-source/wash-documents/wash-coverage/2021-country-files-for-sdg-631/belize\\_blz\\_sdg631\\_2021.xlsx?sfvrsn=480b65ef\\_6](https://cdn.who.int/media/docs/default-source/wash-documents/wash-coverage/2021-country-files-for-sdg-631/belize_blz_sdg631_2021.xlsx?sfvrsn=480b65ef_6).
19. Public Utilities, (The Belize Chamber of Commerce and Industry, accessed 18 May 2023); <https://www.belize.org/trade-investment-zone/investment-regime/public-utilities/#1565200425772-07c28f77-cb7b>.
  20. World Health Organization, 6.3.1. Safely Treated Household Wastewater Benin 2020 Country Estimate (2020, accessed 18 May 2023) ; [https://cdn.who.int/media/docs/default-source/wash-documents/wash-coverage/2021-country-files-for-sdg-631/benin\\_ben\\_sdg631\\_2021.xlsx?sfvrsn=4a8e14af\\_6](https://cdn.who.int/media/docs/default-source/wash-documents/wash-coverage/2021-country-files-for-sdg-631/benin_ben_sdg631_2021.xlsx?sfvrsn=4a8e14af_6).
  21. The World Bank, Republic of Benin Rural Water Supply Universal Access Program (2018); <https://documents1.worldbank.org/curated/en/574991525097378434/pdf/BENIN-PAD-04262018.pdf>.
  22. Asian Development Bank, Bhutan Urban Infrastructure Project (2011); <https://www.adb.org/sites/default/files/linked-documents/44240-013-bhu-fa.pdf>.
  23. D. Israel. Impact of Increased Access and Price on Household Water Use in Urban Bolivia. *The Journal of Environment & Development*, 2007, **16**, 58-83 <https://doi.org/10.1177/1070496506298190>
  24. Prices for Housing and Utilities Services in Bulgaria (Harmony Suites, accessed 18 May 2023); <https://www.harmony-suites.com/prices-for-housing-and-utilities-services-in-bulgaria#:~:text=Water%20supply,about%2020%20BGN%20per%20month.>,
  25. World Health Organization, 6.3.1. Safely Treated Household Wastewater Burkina Faso 2020 Country Estimate (2020, accessed 18 May 2023) ; [https://cdn.who.int/media/docs/default-source/wash-documents/wash-coverage/2021-country-files-for-sdg-631/burkina-faso\\_bfa\\_sdg631\\_2021.xlsx?sfvrsn=db32fd5d\\_8](https://cdn.who.int/media/docs/default-source/wash-documents/wash-coverage/2021-country-files-for-sdg-631/burkina-faso_bfa_sdg631_2021.xlsx?sfvrsn=db32fd5d_8).

26. Water supply and sanitation in Burkina Faso, (World Bank:Burkina Faso - Urban Water Sector Project, 2009, accessed 18 May 2023); [https://en.wikipedia.org/wiki/Water\\_supply\\_and\\_sanitation\\_in\\_Burkina\\_Faso#:~:text=The%20price%20per%20bucket%20corresponds,\(US%240.50%2Fm3\).](https://en.wikipedia.org/wiki/Water_supply_and_sanitation_in_Burkina_Faso#:~:text=The%20price%20per%20bucket%20corresponds,(US%240.50%2Fm3).)
27. World Health Organization, 6.3.1. Safely Treated Household Wastewater Cambodia 2020 Country Estimate (2020, accessed 18 May 2023) ; [https://cdn.who.int/media/docs/default-source/wash-documents/wash-coverage/2021-country-files-for-sdg-631/cambodia\\_khm\\_sdg631\\_2021.xlsx?sfvrsn=e7c7968b\\_6](https://cdn.who.int/media/docs/default-source/wash-documents/wash-coverage/2021-country-files-for-sdg-631/cambodia_khm_sdg631_2021.xlsx?sfvrsn=e7c7968b_6).
28. Water consumption tariff fee of Phnom Penh Water Supply Authority, (OpenDevelopment Cambodia, 2017, accessed 18 May 2023); <https://opendevelopmentcambodia.net/profiles/access-to-public-service/ppwsa-water-consumption-tariff/>.
29. World Health Organization, 6.3.1. Safely Treated Household Wastewater Cameroon 2020 Country Estimate (2020, accessed 18 May 2023); [https://cdn.who.int/media/docs/default-source/wash-documents/wash-coverage/2021-country-files-for-sdg-631/cameroon\\_cmr\\_sdg631\\_2021.xlsx?sfvrsn=e1fb8778\\_6](https://cdn.who.int/media/docs/default-source/wash-documents/wash-coverage/2021-country-files-for-sdg-631/cameroon_cmr_sdg631_2021.xlsx?sfvrsn=e1fb8778_6).
30. Yes, the price of water varies according to the area in Cameroon, (sbbc, 2018, accessed 18 May 2023); <https://www.stopblablacam.com/culture-and-society/0806-1807-yes-the-price-of-water-varies-according-to-the-area-in-cameroon>.
31. Chapter3. Present Situation of Water Supply Sector, (JICA, accessed 18 May 2023); [https://openjicareport.jica.go.jp/pdf/11558582\\_02.pdf](https://openjicareport.jica.go.jp/pdf/11558582_02.pdf).
32. I. Maazaz. Hydraulic bricolages: coexisting water supply and access regimes in N'Djamena, Chad *EchoGéo*, 2021, 57 <https://doi.org/https://doi.org/10.4000/echogeo.22514>
33. World Health Organization, 6.3.1. Safely Treated Household Wastewater Comoros 2020 Country Estimate (2020, accessed 18 May 2023);



- [https://cdn.who.int/media/docs/default-source/wash-documents/wash-coverage/2021-country-files-for-sdg-631/comoros\\_com\\_sdg631\\_2021.xlsx?sfvrsn=99cacabe\\_8](https://cdn.who.int/media/docs/default-source/wash-documents/wash-coverage/2021-country-files-for-sdg-631/comoros_com_sdg631_2021.xlsx?sfvrsn=99cacabe_8).
34. Ensuring climate resilient water supplies in the Comoros Islands, (Green Climate Fund, 2018, accessed 18 May 2023); [https://pims.undp.org/attachments/5740/215762/1712723/1725628/FP-UNDP-160818-5740-Annex%20II-Feasibility%20Study%20\\_2\\_.docx](https://pims.undp.org/attachments/5740/215762/1712723/1725628/FP-UNDP-160818-5740-Annex%20II-Feasibility%20Study%20_2_.docx).
35. Water Rates, (Costarica.com, 2023, accessed 18 May 2023); <https://www.costarica.com/business/water-rates>.
36. World Health Organization, 6.3.1. Safely Treated Household Wastewater Côte d'Ivoire 2020 Country Estimate (2020, accessed 18 May 2023); [https://cdn.who.int/media/docs/default-source/wash-documents/wash-coverage/2021-country-files-for-sdg-631/c%27%B4te-d-ivoire\\_civ\\_sdg631\\_2021.xlsx?sfvrsn=3a5ed007\\_6](https://cdn.who.int/media/docs/default-source/wash-documents/wash-coverage/2021-country-files-for-sdg-631/c%27%B4te-d-ivoire_civ_sdg631_2021.xlsx?sfvrsn=3a5ed007_6).
37. Urban Water Supply Innovations in Côte d'Ivoire: How Cross-Subsidies Help the Poor, (Water and Sanitation Program, 2002 accessed 18 May 2023); <https://documents1.worldbank.org/curated/en/472381468749780795/pdf/266290PAPER0English0Blue0Gold0no1011.pdf>.
38. Residential Water Tariff, (The Association for the Study of the Cuban Economy-ASCE, accessed 18 May 2023); [https://en.wikipedia.org/wiki/Water\\_supply\\_and\\_sanitation\\_in\\_Cuba#Tariffs](https://en.wikipedia.org/wiki/Water_supply_and_sanitation_in_Cuba#Tariffs).
39. Water Rates, (Water Board of Lemesos, accessed 18 May 2023); <https://www.wbl.com.cy/en/page/water-rates>.
40. Electricity & Water Access and Governance Project, (Germany Trade & Invest, 2022, accessed 18 May 2023); <https://www.gtai.de/de/trade/kongo-demokratische-republik/entwicklungsprojekte/nachhaltige-energie-und-wasserversorgung-825606>.

41. World Health Organization, 6.3.1. Safely Treated Household Wastewater Dominican Republic 2020 Country Estimate (2020, accessed 18 May 2023); [https://cdn.who.int/media/docs/default-source/wash-documents/wash-coverage/2021-country-files-for-sdg-631/dominican-republic\\_dom\\_sdg631\\_2021.xlsx?sfvrsn=be3f0e07\\_6](https://cdn.who.int/media/docs/default-source/wash-documents/wash-coverage/2021-country-files-for-sdg-631/dominican-republic_dom_sdg631_2021.xlsx?sfvrsn=be3f0e07_6).
42. A. Martínez Moscoso, V. G. Aguilar Feijó & T. Verdugo Silva. The Vital Minimum Amount of Drinking Water Required in Ecuador. *Resources*, 2018, 7, 15
43. C. Nauges & J. Strand. Estimation of non-tap water demand in Central American cities. *Resource and Energy Economics*, 2007, 29, 165-182  
<https://doi.org/https://doi.org/10.1016/j.reseneeco.2006.05.002>
44. S. Yates, A. Kruger, E. A. Yaari, Z. Mpakama, X. Baloyi, L. Menouer and A. Earle, Water Tariffing: What's at stake? Stockholm International Water Institute (SIWI) (2020); [https://siwi.org/wp-content/uploads/2020/03/AEWPP\\_-\\_Water-Tariffing-2020\\_WEBB.pdf](https://siwi.org/wp-content/uploads/2020/03/AEWPP_-_Water-Tariffing-2020_WEBB.pdf),
45. World Health Organization, 6.3.1. Safely Treated Household Wastewater Gabon 2020 Country Estimate (2020, accessed 18 May 2023); [https://cdn.who.int/media/docs/default-source/wash-documents/wash-coverage/2021-country-files-for-sdg-631/gabon\\_gab\\_sdg631\\_2021.xlsx?sfvrsn=13393cf8\\_6](https://cdn.who.int/media/docs/default-source/wash-documents/wash-coverage/2021-country-files-for-sdg-631/gabon_gab_sdg631_2021.xlsx?sfvrsn=13393cf8_6).
46. International Bank for Reconstruction and Development, Libreville Water Supply Project  
Gabon (1973); <https://documents1.worldbank.org/curated/en/690921468030357220/text/multi-page.txt>.
47. Water, electricity tariffs to increase from April 10th, (The Point, 2023, accessed 18 May 2023); <https://thepoint.gm/africa/gambia/headlines/water-electricity-tariffs-to-increase-from-april-10th>,

48. Georgian gov't will cover increased water tariff for families in need in Tbilisi, Mtskheta, Rustavi, (Agenda.ge, 2020, accessed 18 May 2023); <https://agenda.ge/en/news/2020/4060>.
49. World Health Organization, 6.3.1. Safely Treated Household Wastewater Guinea 2020 Country Estimate (2020, accessed 18 May 2023); [https://cdn.who.int/media/docs/default-source/wash-documents/wash-coverage/2021-country-files-for-sdg-631/guinea\\_gin\\_sdg631\\_2021.xlsx?sfvrsn=ecbd1889\\_6](https://cdn.who.int/media/docs/default-source/wash-documents/wash-coverage/2021-country-files-for-sdg-631/guinea_gin_sdg631_2021.xlsx?sfvrsn=ecbd1889_6).
50. The World Bank, The Welfare Effects of Private Sector Participation in Guineas Urban Water Supply (2000); <https://documents1.worldbank.org/curated/en/505751468749703582/pdf/multi-page.pdf>.
51. The world bank, international development association project paper on a proposed additional credit In the amount of sdr 13.3 million and a proposed additional grant in the amount of sdr 5.2 million and proposed restructuring to the republic of guinea-bissau for an emergency water and electricity services upgrading project (2017); <https://ewsdata.rightsindevelopment.org/files/documents/30/WB-P161630.pdf>.
52. World Health Organization, 6.3.1. Safely Treated Household Wastewater Guyana 2020 Country Estimate (2020, accessed 18 May 2023); [https://cdn.who.int/media/docs/default-source/wash-documents/wash-coverage/2021-country-files-for-sdg-631/guyana\\_guy\\_sdg631\\_2021.xlsx?sfvrsn=27223775\\_6](https://cdn.who.int/media/docs/default-source/wash-documents/wash-coverage/2021-country-files-for-sdg-631/guyana_guy_sdg631_2021.xlsx?sfvrsn=27223775_6).
53. Pricing & Tariffs, (Guyana Water Inc., accessed 18 May 2023); <https://gwiguyana.gy/pricing-tariffs>.
54. World Health Organization, 6.3.1. Safely Treated Household Wastewater Haiti 2020 Country Estimate (2020, accessed 18 May 2023); [https://cdn.who.int/media/docs/default-source/wash-documents/wash-coverage/2021-country-files-for-sdg-631/haiti\\_hti\\_sdg631\\_2021.xlsx?sfvrsn=5ad3d47f\\_6](https://cdn.who.int/media/docs/default-source/wash-documents/wash-coverage/2021-country-files-for-sdg-631/haiti_hti_sdg631_2021.xlsx?sfvrsn=5ad3d47f_6).

55. The world bank, International development association project appraisal document on a proposed grant in the amount of sdr 36.3 million (us\$ 50.00 million equivalent) to the republic of haiti for a sustainable rural and small towns water and sanitation project (2015);  
<https://documents1.worldbank.org/curated/en/604631468179974395/pdf/PAD1060-PAD-P148970-IDA-R2015-0127-1-Box391445B-OUO-9.pdf>.
56. World Health Organization, 6.3.1. Safely Treated Household Wastewater Honduras 2020 Country Estimate (2020, accessed 18 May 2023);  
[https://cdn.who.int/media/docs/default-source/wash-documents/wash-coverage/2021-country-files-for-sdg-631/honduras\\_hnd\\_sdg631\\_2021.xlsx?sfvrsn=560b2879\\_6](https://cdn.who.int/media/docs/default-source/wash-documents/wash-coverage/2021-country-files-for-sdg-631/honduras_hnd_sdg631_2021.xlsx?sfvrsn=560b2879_6).
57. J. Strans, Water pricing in Honduras: A political economy analysis (1998);  
<https://www.sv.uio.no/econ/english/research/Memoranda/working-papers/pdf-files/1998/Memo-21-1998.pdf>
58. Gjaldskrá Ferskt neysluvatn Nr. 26, (hsveitur.is, 2021, accessed 18 May 2023);  
<https://www.hsveitur.is/media/25837/26-01-01-21-ferskvatn.pdf>.
59. J. Harahap, T. Gunawan, S. Suprayogi & M. Widyastuti. A review: Domestic wastewater management system in Indonesia. *IOP Conference Series: Earth and Environmental Science*, 2021, **739**, 012031 <https://doi.org:10.1088/1755-1315/739/1/012031>
60. Reaching the poor in Mashhad City: from subsidising water to providing cash transfers in Iran. *International Journal of Water*, 2016, **10**, 213-227  
<https://doi.org:10.1504/ijw.2016.075569>
61. The world bank, Baghdad Water and Sewerage Improvement Project (P162094) (2017);  
<https://documents1.worldbank.org/curated/en/947941487509910477/pdf/ITM00184-P162094-02-19-2017-1487509904633.pdf>.

62. World Health Organization, 6.3.1. Safely Treated Household Wastewater Jamaica 2020 Country Estimate (2020, accessed 18 May 2023); [https://cdn.who.int/media/docs/default-source/wash-documents/wash-coverage/2021-country-files-for-sdg-631/jamaica\\_jam\\_sdg631\\_2021.xlsx?sfvrsn=e1d48104\\_6](https://cdn.who.int/media/docs/default-source/wash-documents/wash-coverage/2021-country-files-for-sdg-631/jamaica_jam_sdg631_2021.xlsx?sfvrsn=e1d48104_6).
63. National Water Commission 2019-2021 TARIFF APPLICATION, (The National Water Commission 2019, accessed 18 May 2023); <https://nwcjamaica.com/uploads/document/2019-2021-NWC-TARIFF-APPLICATION-FACT-SHEET.pdf>.
64. Asian Development Bank, Republic of Kazakhstan: Astana Integrated Water Master Plan (2011); <https://www.adb.org/sites/default/files/project-documents/51353/51353-001-tar-en.pdf>.
65. Cubic meter of drinking water in Kyrgyzstan should cost from 10 to 100 soms, (24.kg, 2018, accessed 18 May 2023); [https://24.kg/english/79859\\_Cubic\\_meter\\_of\\_drinking\\_water\\_in\\_Kyrgyzstan\\_should\\_cost\\_from\\_10\\_to\\_100\\_soms/](https://24.kg/english/79859_Cubic_meter_of_drinking_water_in_Kyrgyzstan_should_cost_from_10_to_100_soms/).
66. The world bank, Lao People’s Democratic Republic Water Supply and Sanitation Sector Review (2010); <https://documents1.worldbank.org/curated/en/404841468266177438/pdf/686080ESW0P098000December0150020100.pdf>.
67. Water bills in Rīga to rise in October, (LSM.lv., 2022, accessed 18 May 2023); <https://eng.lsm.lv/article/economy/economy/water-bills-in-riga-to-rise-in-october.a471328/>.
68. World Health Organization, 6.3.1. Safely Treated Household Wastewater Lebanon 2020 Country Estimate (2020, accessed 18 May 2023); [https://cdn.who.int/media/docs/default-source/wash-documents/wash-coverage/2021-country-files-for-sdg-631/lebanon\\_lbn\\_sdg631\\_2021.xlsx?sfvrsn=cb9d7790\\_6](https://cdn.who.int/media/docs/default-source/wash-documents/wash-coverage/2021-country-files-for-sdg-631/lebanon_lbn_sdg631_2021.xlsx?sfvrsn=cb9d7790_6).

69. World Health Organization, 6.3.1. Safely Treated Household Wastewater Lesotho 2020 Country Estimate (2020, accessed 18 May 2023); [https://cdn.who.int/media/docs/default-source/wash-documents/wash-coverage/2021-country-files-for-sdg-631/lesotho\\_iso\\_sdg631\\_2021.xlsx?sfvrsn=2e1d54ec\\_6](https://cdn.who.int/media/docs/default-source/wash-documents/wash-coverage/2021-country-files-for-sdg-631/lesotho_iso_sdg631_2021.xlsx?sfvrsn=2e1d54ec_6).
70. Tariffs, (WASCO accessed 18 May 2023); <https://www.wasco.co.ls/tariffs/>.
71. World Health Organization, 6.3.1. Safely Treated Household Wastewater Liberia 2020 Country Estimate (2020, accessed 18 May 2023); [https://cdn.who.int/media/docs/default-source/wash-documents/wash-coverage/2021-country-files-for-sdg-631/liberia\\_lbr\\_sdg631\\_2021.xlsx?sfvrsn=fc994ddd\\_6](https://cdn.who.int/media/docs/default-source/wash-documents/wash-coverage/2021-country-files-for-sdg-631/liberia_lbr_sdg631_2021.xlsx?sfvrsn=fc994ddd_6).
72. Water and Sewerage Tariffs, (the Liberia Water and Sewer Corporation, accessed 18 May 2023); <https://www.lwsc.gov.lr/2content.php?sub=138&related=32&third=138&pg=sp>.
73. Prices, (Vilniaus vandenys, accessed 18 May 2023); <https://www.vv.lt/en/prices-2/>.
74. Water: connecting your home, (Municipal Office of the City of Luxembourg, accessed 18 May 2023); <https://www.vdl.lu/en/living/your-home/water-connecting-your-home>.
75. The world bank, Madagascar National Water Project (P174477) (2022); <https://documents1.worldbank.org/curated/en/099320004112227001/P1744771c9b788cc1e4ff141eb199cd1f98f795d2cfe.docx>.
76. Regulated Water Tariffs, (Regulator for Energy and Water Services, accessed 18 May 2023); <https://www.rews.org.mt/#/en/a/14-regulated-water-tariffs>.
77. World Health Organization, 6.3.1. Safely Treated Household Wastewater Mauritania 2020 Country Estimate (2020, accessed 18 May 2023); [https://cdn.who.int/media/docs/default-source/wash-documents/wash-coverage/2021-country-files-for-sdg-631/mauritania\\_mrt\\_sdg631\\_2021.xlsx?sfvrsn=194b7377\\_6](https://cdn.who.int/media/docs/default-source/wash-documents/wash-coverage/2021-country-files-for-sdg-631/mauritania_mrt_sdg631_2021.xlsx?sfvrsn=194b7377_6).
78. African Development Bank, Islamic Republic of Mauritania: Nouakchott City (Aftout Essahli) Drinking Water Supply Project (2013);

- <https://idev.afdb.org/sites/default/files/Evaluations/2020-03/Nouakchott%20City%20Aftout%20Essahli%20Drinking%20Water%20Supply%20Project.pdf>.
79. Moldova, (Danube Water Program, accessed 18 May 2023); <https://sos.danubis.org/eng/country-notes/moldova/>.
80. The value of water in ger areas of Ulaanbaatar, (Water Science Policy, 2021, accessed 18 May 2023); <https://watersciencepolicy.com/article/the-value-of-water-in-ger-areas-of-ulaanbaatar-5b6ec9b1bfd1?language=English>.
81. World Health Organization, 6.3.1. Safely Treated Household Wastewater Mozambique 2020 Country Estimate (2020, accessed 18 May 2023); [https://cdn.who.int/media/docs/default-source/wash-documents/wash-coverage/2021-country-files-for-sdg-631/mozambique\\_moz\\_sdg631\\_2021b117feeb-6272-4dfa-be01-3f65b5620a51.xlsx?sfvrsn=49610396\\_6](https://cdn.who.int/media/docs/default-source/wash-documents/wash-coverage/2021-country-files-for-sdg-631/mozambique_moz_sdg631_2021b117feeb-6272-4dfa-be01-3f65b5620a51.xlsx?sfvrsn=49610396_6).
82. African Development Fund, Urban Water Supply, Sanitation and Institutional Support Project Republic Of Mozambique (2013); [https://www.afdb.org/fileadmin/uploads/afdb/Documents/Project-and-Operations/Mozambique\\_-\\_Urban\\_Water\\_Supply\\_Sanitation\\_and\\_Institutional\\_Support\\_-\\_Appraisal\\_Report.pdf](https://www.afdb.org/fileadmin/uploads/afdb/Documents/Project-and-Operations/Mozambique_-_Urban_Water_Supply_Sanitation_and_Institutional_Support_-_Appraisal_Report.pdf).
83. World Health Organization, 6.3.1. Safely Treated Household Wastewater Namibia 2020 Country Estimate (2020, accessed 18 May 2023); [https://cdn.who.int/media/docs/default-source/wash-documents/wash-coverage/2021-country-files-for-sdg-631/namibia\\_nam\\_sdg631\\_20210ee2d009-2ead-4612-9ec4-55bec4d7fe69.xlsx?sfvrsn=6a93d8d\\_5](https://cdn.who.int/media/docs/default-source/wash-documents/wash-coverage/2021-country-files-for-sdg-631/namibia_nam_sdg631_20210ee2d009-2ead-4612-9ec4-55bec4d7fe69.xlsx?sfvrsn=6a93d8d_5).
84. R. Ojha, B. R. Thapa, S. Shrestha, J. Shindo, H. Ishidaira & F. Kazama. Water Price Optimization after the Melamchi Water Supply Project: Ensuring Affordability and

- Equitability for Consumer's Water Use and Sustainability for Utilities. *Water*, 2018, **10**, 249
85. FYR Macedonia, (Danube Water Program , accessed 18 May 2023); <https://sos.danubis.org/eng/country-notes/macedonia-fyr/>.
  86. World Health Organization, 6.3.1. Safely Treated Household Wastewater Pakistan 2020 Country Estimate (2020, accessed 18 May 2023); [https://cdn.who.int/media/docs/default-source/wash-documents/wash-coverage/2021-country-files-for-sdg-631/pakistan\\_pak\\_sdg631\\_2021.xlsx?sfvrsn=b6886ef6\\_6](https://cdn.who.int/media/docs/default-source/wash-documents/wash-coverage/2021-country-files-for-sdg-631/pakistan_pak_sdg631_2021.xlsx?sfvrsn=b6886ef6_6).
  87. World Health Organization, 6.3.1. Safely Treated Household Wastewater Panama 2020 Country Estimate (2020, accessed 18 May 2023); [https://cdn.who.int/media/docs/default-source/wash-documents/wash-coverage/2021-country-files-for-sdg-631/panama\\_pan\\_sdg631\\_2021.xlsx?sfvrsn=4ea1ced0\\_6](https://cdn.who.int/media/docs/default-source/wash-documents/wash-coverage/2021-country-files-for-sdg-631/panama_pan_sdg631_2021.xlsx?sfvrsn=4ea1ced0_6).
  88. World Health Organization, 6.3.1. Safely Treated Household Wastewater Peru 2020 Country Estimate (2020, accessed 18 May 2023); [https://cdn.who.int/media/docs/default-source/wash-documents/wash-coverage/2021-country-files-for-sdg-631/peru\\_per\\_sdg631\\_2021.xlsx?sfvrsn=5a94c1cd\\_6](https://cdn.who.int/media/docs/default-source/wash-documents/wash-coverage/2021-country-files-for-sdg-631/peru_per_sdg631_2021.xlsx?sfvrsn=5a94c1cd_6).
  89. Bucharest water company changes tariff structure for water, sewage, (romania-insider.com, 2017, accessed 18 May 2023); <https://www.romania-insider.com/bucharest-water-company-changes-tariff-structure-water-sewage>.
  90. D. Dimkić, M. Milovanović, M. Dimkić & S. Milojković. Current and Economic Price of Water in Serbia. *Environmental Sciences Proceedings*, 2020, **2**, 45
  91. Water supply in Sierra Leone, (profilbaru.com, accessed 18 May 2023); [https://profilbaru.com/article/Water\\_supply\\_in\\_Sierra\\_Leone](https://profilbaru.com/article/Water_supply_in_Sierra_Leone).
  92. Water connection, (National Agency for Network and Electronic Services, accessed 18 May 2023); [https://www.slovensko.sk/en/life-situation/life-situation/\\_water-connection](https://www.slovensko.sk/en/life-situation/life-situation/_water-connection).



93. Slovenia, (Danube Water Program, accessed 18 May 2023); <https://sos.danubis.org/eng/country-notes/slovenia/>.
94. K&M Advisors, Governance Position Paper on the Caribbean Water and Sanitation Sector Final Report and Action Plan (2019); <https://clmeplus.org/app/uploads/2020/04/Governance-Pos-Paper-on-the-Caribbean-Water-and-Sanitation-Sector.pdf>.
95. World Health Organization, 6.3.1. Safely Treated Household Wastewater Tajikistan 2020 Country Estimate (2020, accessed 18 May 2023); [https://cdn.who.int/media/docs/default-source/wash-documents/wash-coverage/2021-country-files-for-sdg-631/tajikistan\\_tjk\\_sdg631\\_2021.xlsx?sfvrsn=d7aaf275\\_6](https://cdn.who.int/media/docs/default-source/wash-documents/wash-coverage/2021-country-files-for-sdg-631/tajikistan_tjk_sdg631_2021.xlsx?sfvrsn=d7aaf275_6).
96. Asian Development Bank, Proposed Grant Republic of Tajikistan: Dushanbe Water Supply and Sanitation Project (2018); <https://www.adb.org/sites/default/files/project-documents/50347/50347-002-rrp-en.pdf>.
97. PWA Water Tariff Rate, (Provincial Waterworks Authority, accessed 18 May 2023); <https://en.pwa.co.th/contents/service/table-price>.
98. World Health Organization, 6.3.1. Safely Treated Household Wastewater Timor-Leste 2020 Country Estimate (2020, accessed 18 May 2023); [https://cdn.who.int/media/docs/default-source/wash-documents/wash-coverage/2021-country-files-for-sdg-631/timor-leste\\_tls\\_sdg631\\_2021.xlsx?sfvrsn=f2a3d44c\\_6](https://cdn.who.int/media/docs/default-source/wash-documents/wash-coverage/2021-country-files-for-sdg-631/timor-leste_tls_sdg631_2021.xlsx?sfvrsn=f2a3d44c_6).
99. Economic Analysis, Dili West Water Supply Project: Report and Recommendation of the President (2022); <https://www.adb.org/sites/default/files/linked-documents/54429-001-ea.pdf>.
100. M. Favre & M. Montginoul. Water pricing in Tunisia: Can an original rate structure achieve multiple objectives? *Utilities Policy*, 2018, **55**, 209-223 <https://doi.org/https://doi.org/10.1016/j.jup.2018.06.004>

101. World Health Organization, 6.3.1. Safely Treated Household Wastewater Turkmenistan 2020 Country Estimate (2020, accessed 18 May 2023); [https://cdn.who.int/media/docs/default-source/wash-documents/wash-coverage/2021-country-files-for-sdg-631/turkmenistan\\_tkm\\_sdg631\\_2021.xlsx?sfvrsn=7ec2c89b\\_6](https://cdn.who.int/media/docs/default-source/wash-documents/wash-coverage/2021-country-files-for-sdg-631/turkmenistan_tkm_sdg631_2021.xlsx?sfvrsn=7ec2c89b_6).
102. Y. Volovik, Assessment of Water Sector in Turkmenistan, (2010); [http://www.cawater-info.net/bk/water\\_law/pdf/tm\\_water\\_sector\\_assessment\\_en.pdf](http://www.cawater-info.net/bk/water_law/pdf/tm_water_sector_assessment_en.pdf).
103. Utility tariffs: cold and hot water, heating, gas, electricity in Tashkent, (Golden Pages, accessed 18 May 2023); <https://www.goldenpages.uz/en/komunal-tarifi/>.
104. World Health Organization, 6.3.1. Safely Treated Household Wastewater Zambia 2020 Country Estimate (2020, accessed 18 May 2023); [https://cdn.who.int/media/docs/default-source/wash-documents/wash-coverage/2021-country-files-for-sdg-631/zambia\\_zmb\\_sdg631\\_2021.xlsx?sfvrsn=5120ebf\\_8](https://cdn.who.int/media/docs/default-source/wash-documents/wash-coverage/2021-country-files-for-sdg-631/zambia_zmb_sdg631_2021.xlsx?sfvrsn=5120ebf_8).
105. Water Supply And Sewerage Tariffs 2017, (NWaSCO, 2017, accessed 18 May 2023); [http://admin.theiguides.org/Media/Documents/WATER\\_AND\\_SEWERAGE\\_TARIFFS\\_FOR\\_2017\\_final.pdf](http://admin.theiguides.org/Media/Documents/WATER_AND_SEWERAGE_TARIFFS_FOR_2017_final.pdf).
106. UNICEF, Libya Water Scarcity and Climate Change: an analysis on WASH enabling environment in Libya (2022); [https://www.unicef.org/mena/media/19321/file/Libya%20water%20scarcity%20analysis%20and%20recommendations\\_%20UNICEF%20Sep%202022.pdf](https://www.unicef.org/mena/media/19321/file/Libya%20water%20scarcity%20analysis%20and%20recommendations_%20UNICEF%20Sep%202022.pdf).
107. M. Fall, P. Marin, A. Locussol, R. Verspyck, Reforming Urban Water Utilities in Western and Central Africa: Experiences with Public-Private Partnerships, Water Sector Board Discussion Paper Series (2009); <https://www.ifc.org/wps/wcm/connect/fe59dec8-54f0-4e15-9820-f9f4536ff4f4/WaterPPPvol1.pdf?MOD=AJPERES&CVID=jw07cqM>.
108. African Development Bank Group, South Sudan: An Infrastructure Action Plan - A Program for Sustained Strong Economic Growth, Chapter 9: Water Supply and

- Sanitation (2013); <https://www.afdb.org/fileadmin/uploads/afdb/Documents/Generic-Documents/South%20Sudan%20Infrastructure%20Action%20Plan%20-%20%20A%20Program%20for%20Sustained%20Strong%20Economic%20Growth%20-%20Chapter%209%20-%20Water%20Supply%20and%20Sanitation.pdf>.
109. World Health Organization, 6.3.1. Safely Treated Household Wastewater Syrian Arab Republic 2020 Country Estimate (2020, accessed 18 May 2023); [https://cdn.who.int/media/docs/default-source/wash-documents/wash-coverage/2021-country-files-for-sdg-631/syrian-arab-republic\\_syr\\_sdg631\\_2021.xlsx?sfvrsn=8c81e81d\\_6](https://cdn.who.int/media/docs/default-source/wash-documents/wash-coverage/2021-country-files-for-sdg-631/syrian-arab-republic_syr_sdg631_2021.xlsx?sfvrsn=8c81e81d_6).
  110. P. H. John. in *Water Conservation* (ed K. Jha Manoj) Ch. 8 (IntechOpen, 2011).
  111. N. Mohammed, Abu-Lohom, Y. Konishi, Y. Mumssen, B. Zabara, and S. Michael Moore, Water Supply in a War Zone A Preliminary Analysis of Two Urban Water Tanker Supply Systems in the Republic of Yemen, World Bank Group (2018); <https://documents1.worldbank.org/curated/pt/434091532620702995/pdf/128907-WP-P165727-Water-Supply-in-a-War-Zone-PUBLIC.pdf>.
  112. Singapore Water Story (PUB. Singapore’s National Water Agency, accessed 6 September 2022); <https://www.pub.gov.sg/watersupply/singaporewaterstory>.
  113. PUB Sustainability Report FY2020/21 (PUB. Singapore’s National Water Agency, 2021); [https://www.pub.gov.sg/Documents/Publications/PUB\\_Sustainability\\_Report.pdf](https://www.pub.gov.sg/Documents/Publications/PUB_Sustainability_Report.pdf).
  114. PUB to achieve net zero emissions by increasing renewable energy sources and leveraging innovative solutions to close carbon loop (Singapore’s National Water Agency, 2021); <https://www.pub.gov.sg/news/pressreleases/2021pr018>.
  115. PUB pushes the frontier of water technology to reach future energy and sludge reduction targets (PUB. Singapore’s National Water Agency, 2018);

[https://www.nas.gov.sg/archivesonline/data/pdfdoc/20180704002/Press%20Release\\_PUB%20RD%20blueprint.pdf](https://www.nas.gov.sg/archivesonline/data/pdfdoc/20180704002/Press%20Release_PUB%20RD%20blueprint.pdf).

116. Tang, L., PUB aims to double water supply by 2060 without using more energy or producing more waste (today, 2018, accessed 6 September 2022); <https://www.todayonline.com/singapore/pub-aims-double-water-supply-2060-without-using-more-energy-producing-more-waste>.
117. Chandran, R., Land-starved Singapore gets creative with solar in clean energy push (Reuters, 2021, accessed 6 September 2022); <https://www.reuters.com/article/us-singapore-renewables-solar-trfn-idUSKBN2C30ZD>
